# Supplementary material for: Polyphosphate discriminates protein conformational ensembles more efficiently than DNA promoting diverse assembly and maturation behaviors
Source: eLife. 2025 Jul 14;14:RP105461. doi: 10.7554/eLife.105461 (PMC12259020; doi:10.7554/eLife.105461)
Supplement: Source data 1. [file elife-105461-data1.xlsx]

## Sheet: Figure 1
Disorder Propensity of CytR DBD (panel 1C)				Far-UV CD Signal (panel 1D)					Far-UV CD signal (panel 1E)					Stokes Radius (panel 1F)
Residue number	IUPred Score (Long disorder prediction)	IUPred Score (Short disorder prediction)		Wavelength (nm)	WT MRE @ 298 K	DM MRE @ 298 K	P33A MRE @ 298 K		Temperature (K)	WT MRE @222 nm	DM MRE @222 nm	P33A MRE @222 nm		Protein	Stokes Radius	Error
1	0.7672	0.9142		250	0	0	0		278.15	-7612.95	-11226.7	-5073.29		P33A	21.5766	0.6702
2	0.7289	0.904		249	-46.4468	-41.6565	0.3252		283.15	-7796.27	-11228.8	-4785.15		WT	19.9433	0.7922
3	0.7505	0.8664		248	-72.4955	-78.6408	-28.066		288.15	-7711.21	-11096.9	-4634.47		DM	17.2242	0.47
4	0.7672	0.8114		247	-89.0125	-120.869	-90.7249		293.15	-7415.25	-10790.6	-4512.12
5	0.6991	0.747		246	-104.604	-184.606	-103.824		298.15	-6995.66	-10419.8	-4488.19
6	0.6806	0.6798		245	-167.861	-294.268	-198.532		303.15	-6553.99	-9794.22	-4365.48
7	0.6089	0.6146		244	-241.546	-371.094	-220.884		308.15	-6002.1	-8953.74	-4387.76
8	0.6322	0.5551		243	-370.029	-492.299	-282.08		313.15	-5570.14	-7878.34	-4377.18
9	0.6183	0.5036		242	-506.968	-606.816	-345.838		318.15	-5192.74	-6937.05	-4475.09
10	0.6375	0.4614		241	-639.854	-818.242	-461.611		323.15	-5041.4	-5972.29	-4570.46
11	0.5854	0.4268		240	-813.786	-1069.41	-597.665		328.15	-4948.73	-5221.39	-4737.16
12	0.6227	0.4053		239	-1011.59	-1321.29	-726.327		333.15	-4976.72	-4803.89	-4843.68
13	0.6183	0.3926		238	-1292.63	-1628.61	-920.078		338.15	-5037.59	-4636.44	-4953.07
14	0.6183	0.3823		237	-1573.94	-2050.1	-1151.09		343.15	-5171.16	-4516.66	-5107.27
15	0.6183	0.3723		236	-1870.34	-2475.11	-1426.64		348.15	-5292.77	-4587.87	-5250.93
16	0.5493	0.3626		235	-2237.92	-3018.92	-1653.21		353.15	-5330.8	-4674.56	-5374.94
17	0.5419	0.3553		234	-2655.82	-3626.1	-1880.33		358.15	-5376.84	-4678.36	-5511.69
18	0.5577	0.3486		233	-3082.72	-4327.36	-2122.52		363.15	-5397.91	-4729.66	-5708.87
19	0.5342	0.3448		232	-3563.81	-4989.66	-2376.97		368.15	-5504.44	-4773.08	-5794.35
20	0.4979	0.3355		231	-4028.97	-5709.94	-2642.25
21	0.4979	0.3409		230	-4533.65	-6502.61	-2915.56
22	0.5139	0.3507		229	-4959.73	-7306.56	-3252.62
23	0.5758	0.3681		228	-5418.56	-7980.32	-3505.39
24	0.5707	0.3832		227	-5832.95	-8618.07	-3788.63
25	0.5758	0.3933		226	-6266.03	-9147.72	-4017.26
26	0.5707	0.4122		225	-6593.4	-9629.17	-4195.98
27	0.5992	0.433		224	-6799.6	-10036.5	-4305.52
28	0.6806	0.4516		223	-6977.99	-10370	-4406.43
29	0.6482	0.4646		222	-7123.93	-10518.9	-4490.45
30	0.6806	0.479		221	-7187.32	-10558.8	-4504.86
31	0.6906	0.4958		220	-7245.36	-10516.9	-4515.88
32	0.7672	0.5117		219	-7202.29	-10527	-4550.24
33	0.7799	0.5234		218	-7177.69	-10361.9	-4620.91
34	0.7163	0.5284		217	-7192.52	-10205.7	-4719.45
35	0.7459	0.5329		216	-7228.83	-10084.4	-4790.33
36	0.7505	0.5459		215	-7267.72	-10047.5	-4972.55
37	0.7843	0.5596		214	-7543.83	-10132.8	-5254.5
38	0.7595	0.5676		213	-7955.03	-10354.3	-5705.06
39	0.7629	0.568		212	-8436.54	-10703.2	-6192.44
40	0.7881	0.5628		211	-9132.59	-11302.5	-6924.43
41	0.7881	0.5598		210	-10167.3	-12033.2	-7928.49
42	0.8085	0.5499		209	-11381.8	-12749.4	-9128.01
43	0.6991	0.5325		208	-12628.1	-13468.7	-10518.5
44	0.5901	0.5244		207	-13879.1	-13948.2	-12110.6
45	0.6269	0.522		206	-15104	-14235.8	-13748.7
46	0.6269	0.5287		205	-16118.6	-14089.6	-15454.7
47	0.7289	0.5315		204	-17011.5	-13769.3	-17146.6
48	0.6991	0.5392		203	-17778.8	-13104.7	-18755.8
49	0.6851	0.5503		202	-18201.3	-11960.4	-20306
50	0.7289	0.5585		201	-18419.8	-10191.5	-21700
51	0.7415	0.5608		200	-17869.5	-7755.01	-22573.7
52	0.6661	0.5541		199	-16792.7	-4625.65	-22965.9
53	0.6531	0.5481		198	-15092.6	-953.606	-22937.7
54	0.6482	0.5475		197	-12896.1	2934.01	-22009.6
55	0.7289	0.5567		196	-9917.85	6455.93	-20845.2
56	0.7289	0.5787		195	-7428.13	9290.59	-18956.6
57	0.712	0.605		194	-4357.41	11280.1	-16669.9
58	0.7289	0.6448		193	-2029.89	13633.9	-14111.1
59	0.7459	0.6916		192	-195.399	14749.9	-11371.5
60	0.7163	0.7426		191	1625.1	15677	-9377.83
61	0.6991	0.795		190	3852.71	17237.1	-5721.63
62	0.7672	0.8458
63	0.7629	0.892
64	0.8792	0.9312
65	0.9362	0.9614
66	0.9081	0.9814

## Sheet: Figure 2
Phase Diagram (panel 2A)								OD at 350 nm as a function of ionic strength (panel 2E)						FRAP @ 0 min (panel 2I)
Protein conc. (µM)	OD 350 @ 3 µM polyP	OD 350 @ 6 µM polyP	OD 350 @ 11 µM polyP	OD 350 @ 22 µM polyP	OD 350 @ 41 µM polyP	OD 350 @ 100 µM polyP		Ionic Strength (mM)	OD @350 nm	error	fit			WT				DM
5	0.207	0.167	0.095	0.009	0.001	0.006		20	1.201	0.1754	1.2578			Time (sec)	Experimental data points	error	fit	Time (sec)	Experimental data points	error	fit
25	0.278	0.48	0.559	0.505	0.383	0.011		43	1.2315	0.0813	1.242			0	1	0		0	1	0
55	0.33	0.502	0.736	0.806	0.759	0.862		60	1.215	0.0438	1.2197			0.4842	1.0071	0.0398		0.4842	1.0153	0.0148
90	0.288	0.49	0.767	0.787	0.998	0.881		80	1.2975	0.0544	1.1725			1.3883	0	0	0.0372	1.2803	0	0	0.1033
125	0.288	0.494	0.891	0.91	1.076	1.094		100	1.0595	0.0841	1.0883			1.8725	0.0921	0.052	0.0893	1.7645	0.1343	0.0385	0.1459
								120	0.954	0.1202	0.9518			2.3567	0.1538	0.0755	0.1372	2.2487	0.191	0.0512	0.1854
								140	0.697	0.0113	0.7611			2.8409	0.1943	0.0837	0.1813	2.7329	0.2406	0.0448	0.2221
								160	0.5735	0.1492	0.5436			3.3251	0.2391	0.075	0.2219	3.2171	0.2903	0.0434	0.2563
								180	0.3575	0.0021213	0.3461			3.8093	0.2778	0.0887	0.2594	3.7013	0.3132	0.0558	0.2882
								200	0.208	0.0212	0.2005			4.2935	0.3118	0.0691	0.2939	4.1855	0.3418	0.0483	0.3179
														4.7777	0.3394	0.0669	0.3258	4.6697	0.3599	0.0539	0.3455
														5.2619	0.3698	0.0687	0.3552	5.1539	0.3822	0.0478	0.3713
														5.7461	0.3973	0.0568	0.3824	5.6381	0.421	0.0576	0.3954
														6.2303	0.4126	0.0655	0.4075	6.1223	0.442	0.0343	0.4179
														6.7145	0.4204	0.0687	0.4308	6.6065	0.4462	0.0451	0.4389
														7.1987	0.455	0.0459	0.4524	7.0907	0.4659	0.0552	0.4585
														7.6829	0.4732	0.0543	0.4724	7.5749	0.4909	0.0461	0.4769
														8.167	0.4936	0.0594	0.491	8.059	0.502	0.0465	0.4941
														8.6512	0.5019	0.029	0.5083	8.5432	0.5008	0.0519	0.5102
														9.1354	0.5008	0.0709	0.5244	9.0274	0.5294	0.0412	0.5253
														9.6196	0.5342	0.0518	0.5394	9.5116	0.5547	0.0547	0.5395
														10.1038	0.537	0.0504	0.5534	9.9958	0.5583	0.0481	0.5528
														10.588	0.5575	0.04	0.5664	10.48	0.5773	0.0517	0.5653
														11.0722	0.5834	0.0538	0.5787	10.9642	0.5699	0.0306	0.5771
														11.5564	0.582	0.0514	0.5901	11.4484	0.575	0.0486	0.5882
														12.0406	0.5874	0.0486	0.6008	11.9326	0.6027	0.056	0.5987
														12.5248	0.5952	0.0519	0.6109	12.4168	0.6066	0.0331	0.6086
														13.009	0.6143	0.0358	0.6204	12.901	0.6139	0.0556	0.6179
														13.4932	0.6298	0.0521	0.6293	13.3852	0.6074	0.0537	0.6267
														13.9774	0.6231	0.0632	0.6377	13.8694	0.624	0.0488	0.6351
														14.4616	0.6338	0.0276	0.6457	14.3536	0.6313	0.0576	0.643
														14.9458	0.6515	0.0552	0.6532	14.8378	0.6441	0.055	0.6505
														15.43	0.6544	0.0608	0.6603	15.322	0.6587	0.0332	0.6576
														15.9142	0.6526	0.0487	0.6671	15.8062	0.6681	0.037	0.6644
														16.3984	0.6586	0.0568	0.6735	16.2904	0.6709	0.0285	0.6708
														16.8826	0.6592	0.0617	0.6796	16.7746	0.6649	0.0506	0.6769
														17.3668	0.6924	0.0572	0.6855	17.2588	0.6694	0.0643	0.6828
														17.851	0.692	0.0629	0.6911	17.743	0.6664	0.0402	0.6883
														18.3352	0.7019	0.0596	0.6964	18.2272	0.6893	0.0464	0.6937
														18.8194	0.7019	0.0581	0.7015	18.7114	0.6877	0.0287	0.6988
														19.3036	0.6996	0.0706	0.7064	19.1956	0.6856	0.0474	0.7036
														19.7878	0.6943	0.0698	0.7111	19.6798	0.704	0.0361	0.7083
														20.2719	0.7095	0.0728	0.7156	20.1639	0.7036	0.041	0.7128
														20.7561	0.7112	0.0727	0.7199	20.6481	0.7124	0.0593	0.7171
														21.2403	0.7349	0.0486	0.7241	21.1323	0.7039	0.0411	0.7212
														21.7245	0.7284	0.0742	0.7282	21.6165	0.7	0.048	0.7252
														22.2087	0.7316	0.0804	0.7321	22.1007	0.7267	0.0587	0.729
														22.6929	0.7412	0.0821	0.7359	22.5849	0.7209	0.0466	0.7327
														23.1771	0.7527	0.0757	0.7395	23.0691	0.7416	0.0331	0.7363
														23.6613	0.7529	0.0717	0.7431	23.5533	0.7228	0.033	0.7397
														24.1455	0.7483	0.0845	0.7466	24.0375	0.7293	0.0368	0.7431
														24.6297	0.7543	0.0644	0.7499	24.5217	0.7422	0.0388	0.7463
														25.1139	0.7607	0.0623	0.7532	25.0059	0.7309	0.0283	0.7494
														25.5981	0.7462	0.0645	0.7564	25.4901	0.7443	0.0357	0.7524
														26.0823	0.7561	0.0799	0.7595	25.9743	0.745	0.0467	0.7553
														26.5665	0.7758	0.071	0.7625	26.4585	0.766	0.0345	0.7582
														27.0507	0.7631	0.0708	0.7654	26.9427	0.772	0.0371	0.7609
														27.5349	0.7716	0.0763	0.7683	27.4269	0.76	0.0229	0.7636
														28.0191	0.7865	0.0646	0.7711	27.9111	0.7823	0.024	0.7662
														28.5033	0.7832	0.0757	0.7739	28.3953	0.768	0.04	0.7688
														28.9875	0.7888	0.076	0.7766	28.8795	0.763	0.0321	0.7712
														29.4717	0.7845	0.0701	0.7792	29.3637	0.7808	0.0308	0.7736
														29.9559	0.7809	0.0705	0.7818	29.8479	0.7956	0.0348	0.776
														30.4401	0.7807	0.072	0.7843	30.3321	0.7831	0.0422	0.7783
														30.9243	0.7808	0.0662	0.7868	30.8163	0.7666	0.0217	0.7805
														31.4085	0.7962	0.0737	0.7892	31.3005	0.796	0.0372	0.7827
														31.8927	0.8078	0.0835	0.7916	31.7847	0.7868	0.0316	0.7848
														32.3768	0.7987	0.0769	0.794	32.2688	0.7898	0.0367	0.7869
														32.861	0.7956	0.0849	0.7963	32.753	0.7855	0.0158	0.7889
														33.3452	0.8032	0.0791	0.7985	33.2372	0.7895	0.0197	0.7909
														33.8294	0.8031	0.0836	0.8007	33.7214	0.7959	0.05	0.7928
														34.3136	0.8089	0.0836	0.8029	34.2056	0.774	0.0508	0.7947
														34.7978	0.8082	0.0824	0.8051	34.6898	0.818	0.048	0.7966
														35.282	0.8073	0.0665	0.8072	35.174	0.8084	0.0363	0.7984
														35.7662	0.8312	0.0914	0.8093	35.6582	0.8354	0.043	0.8002
														36.2504	0.8124	0.0864	0.8113	36.1424	0.8151	0.045	0.8019
														36.7346	0.7915	0.084	0.8133	36.6266	0.8202	0.0486	0.8036
														37.2188	0.8233	0.0879	0.8153	37.1108	0.7926	0.0363	0.8053
														37.703	0.8271	0.0942	0.8173	37.595	0.8206	0.0572	0.807
														38.1872	0.8047	0.1071	0.8192	38.0792	0.8067	0.0533	0.8086
														38.6714	0.8285	0.0761	0.8211	38.5634	0.8187	0.0416	0.8102
														39.1556	0.832	0.0964	0.823	39.0476	0.8192	0.0356	0.8117
														39.6398	0.8451	0.0783	0.8248	39.5318	0.8197	0.0348	0.8132
														40.124	0.8202	0.0875	0.8266	40.016	0.8246	0.0425	0.8147
														40.6082	0.8374	0.0744	0.8284	40.5002	0.8315	0.0366	0.8162
														41.0924	0.8485	0.1019	0.8302	40.9844	0.8138	0.0526	0.8176
														41.5766	0.8313	0.0818	0.8319	41.4686	0.8165	0.0287	0.8191
														42.0608	0.8388	0.0783	0.8336	41.9528	0.8125	0.0434	0.8204
														42.545	0.8353	0.0999	0.8353	42.437	0.8256	0.0302	0.8218
														43.0292	0.8431	0.0781	0.837	42.9212	0.8105	0.031	0.8232
														43.5134	0.8494	0.0727	0.8386	43.4054	0.8317	0.0567	0.8245
														43.9976	0.8327	0.0763	0.8402	43.8896	0.8442	0.0397	0.8258
														44.4817	0.8291	0.0835	0.8418	44.3737	0.8185	0.0449	0.827
														44.9659	0.8269	0.0812	0.8434	44.8579	0.8262	0.036	0.8283
														45.4501	0.8419	0.0769	0.8449	45.3421	0.8192	0.0315	0.8295
														45.9343	0.8565	0.0742	0.8465	45.8263	0.8188	0.0369	0.8307
														46.4185	0.8283	0.0776	0.848	46.3105	0.8229	0.0425	0.8319
														46.9027	0.8491	0.0948	0.8495	46.7947	0.8241	0.0449	0.8331
														47.3869	0.851	0.0773	0.8509	47.2789	0.8373	0.0346	0.8342
														47.8711	0.8425	0.0747	0.8524	47.7631	0.8384	0.0427	0.8354
														48.3553	0.8623	0.083	0.8538	48.2473	0.8505	0.0487	0.8365
														48.8395	0.8513	0.0844	0.8552	48.7315	0.8454	0.0237	0.8376
														49.3237	0.8539	0.0797	0.8566	49.2157	0.8328	0.036	0.8387
														49.8079	0.8596	0.0667	0.858	49.6999	0.8377	0.0356	0.8397
														50.2921	0.8555	0.0785	0.8593	50.1841	0.8415	0.0468	0.8408
														50.7763	0.8691	0.0924	0.8607	50.6683	0.8527	0.0497	0.8418
														51.2605	0.8491	0.0723	0.862	51.1525	0.8288	0.0441	0.8428
														51.7447	0.8546	0.0771	0.8633	51.6367	0.8496	0.03	0.8438
														52.2289	0.8645	0.0888	0.8646	52.1209	0.8432	0.0374	0.8447
														52.7131	0.8625	0.0842	0.8658	52.6051	0.8531	0.062	0.8457
														53.1973	0.8709	0.0821	0.8671	53.0893	0.858	0.0382	0.8466
														53.6815	0.8734	0.0853	0.8683	53.5735	0.8582	0.0298	0.8476
														54.1657	0.8719	0.0805	0.8695	54.0577	0.8543	0.0319	0.8485
														54.6499	0.8791	0.0844	0.8707	54.5419	0.8516	0.0523	0.8494
														55.1341	0.855	0.0814	0.8719	55.0261	0.8572	0.0312	0.8503
														55.6183	0.8724	0.0933	0.8731	55.5103	0.8462	0.0413	0.8511
														56.1025	0.8588	0.0744	0.8742	55.9945	0.8466	0.0594	0.852
														56.5866	0.8726	0.1005	0.8754	56.4786	0.8715	0.0397	0.8528
														57.0708	0.8695	0.0897	0.8765	56.9628	0.8473	0.0496	0.8537
														57.555	0.8789	0.0958	0.8776	57.447	0.8663	0.0607	0.8545
														58.0392	0.8705	0.0784	0.8787	57.9312	0.8439	0.0486	0.8553
														58.5234	0.8802	0.0954	0.8797	58.4154	0.8567	0.0333	0.8561
														59.0076	0.8766	0.0742	0.8808	58.8996	0.8565	0.0152	0.8569
														59.4918	0.8782	0.0792	0.8819	59.3838	0.8635	0.0504	0.8576
														59.976	0.8907	0.0733	0.8829	59.868	0.8581	0.0332	0.8584
														60.4602	0.885	0.091	0.8839	60.3522	0.879	0.0394	0.8591
														60.9444	0.8856	0.0952	0.8849	60.8364	0.8551	0.0336	0.8598
														61.4286	0.8855	0.0875	0.8859	61.3206	0.8821	0.0362	0.8606
														61.9128	0.8795	0.0975	0.8869	61.8048	0.8432	0.0476	0.8613
														62.397	0.8905	0.0757	0.8879	62.289	0.8695	0.037	0.862
														62.8812	0.8729	0.0662	0.8888	62.7732	0.8677	0.0464	0.8626
														63.3654	0.9003	0.1079	0.8898	63.2574	0.8508	0.0439	0.8633
														63.8496	0.8829	0.0828	0.8907	63.7416	0.8686	0.0425	0.864
														64.3338	0.8888	0.0711	0.8916	64.2258	0.8585	0.0347	0.8646
														64.818	0.8823	0.0975	0.8925	64.71	0.872	0.0601	0.8653
														65.3022	0.8855	0.0904	0.8934	65.1942	0.8823	0.0501	0.8659
														65.7864	0.8836	0.0859	0.8943	65.6784	0.8828	0.0292	0.8665
														66.2706	0.8673	0.088	0.8952	66.1626	0.8606	0.0369	0.8671
														66.7548	0.8836	0.0923	0.896	66.6468	0.8514	0.0366	0.8677
														67.239	0.8931	0.0669	0.8969	67.131	0.8601	0.0508	0.8683
														67.7232	0.8921	0.086	0.8977	67.6152	0.8452	0.0388	0.8689
														68.2074	0.8888	0.0756	0.8985	68.0994	0.858	0.0504	0.8695
														68.6915	0.902	0.1002	0.8994	68.5835	0.8591	0.0531	0.8701
														69.1757	0.9173	0.0965	0.9002	69.0677	0.8644	0.0351	0.8706
														69.6599	0.9118	0.1075	0.901	69.5519	0.8598	0.0341	0.8712
														70.1441	0.9195	0.0911	0.9017	70.0361	0.874	0.0239	0.8717
														70.6283	0.9158	0.098	0.9025	70.5203	0.8736	0.0408	0.8722
														71.1125	0.9168	0.1091	0.9033	71.0045	0.8826	0.0575	0.8728
														71.5967	0.9244	0.0835	0.904	71.4887	0.8732	0.0509	0.8733
														72.0809	0.923	0.1018	0.9048	71.9729	0.8764	0.0392	0.8738
														72.5651	0.916	0.0892	0.9055	72.4571	0.8714	0.0553	0.8743
														73.0493	0.9154	0.1271	0.9062	72.9413	0.8816	0.0634	0.8748
														73.5335	0.9043	0.0987	0.9069	73.4255	0.8822	0.0716	0.8753
														74.0177	0.9069	0.1048	0.9076	73.9097	0.8806	0.0425	0.8757
														74.5019	0.9126	0.0925	0.9083	74.3939	0.8642	0.05	0.8762
														74.9861	0.9045	0.0974	0.909	74.8781	0.8883	0.0639	0.8767
														75.4703	0.917	0.082	0.9097	75.3623	0.873	0.0535	0.8771
														75.9545	0.9046	0.0931	0.9104	75.8465	0.8688	0.0517	0.8776
														76.4387	0.9125	0.0872	0.911	76.3307	0.8846	0.0482	0.878
														76.9229	0.9016	0.0905	0.9117	76.8149	0.8719	0.0564	0.8784
														77.4071	0.9111	0.0907	0.9123	77.2991	0.9067	0.074	0.8789
														77.8913	0.9223	0.0999	0.913	77.7833	0.8826	0.0624	0.8793
														78.3755	0.9153	0.0904	0.9136	78.2675	0.8683	0.0617	0.8797
														78.8597	0.9123	0.089	0.9142	78.7517	0.8857	0.0659	0.8801
														79.3439	0.9069	0.0876	0.9148	79.2359	0.892	0.0684	0.8805
														79.8281	0.915	0.1073	0.9154	79.7201	0.8748	0.061	0.8809
														80.3123	0.9267	0.1033	0.916	80.2043	0.8735	0.0651	0.8813
														80.7964	0.9295	0.0953	0.9166	80.6884	0.8796	0.079	0.8817
														81.2806	0.9208	0.1067	0.9172	81.1726	0.8818	0.045	0.882
														81.7648	0.9211	0.0835	0.9177	81.6568	0.883	0.0675	0.8824
														82.249	0.9402	0.0887	0.9183	82.141	0.9	0.0547	0.8828
														82.7332	0.9119	0.0941	0.9189	82.6252	0.8811	0.0607	0.8831
														83.2174	0.9335	0.0983	0.9194	83.1094	0.8743	0.0884	0.8835
														83.7016	0.9104	0.0855	0.9199	83.5936	0.8605	0.0503	0.8838
														84.1858	0.9234	0.0935	0.9205	84.0778	0.8854	0.0334	0.8842
														84.67	0.9172	0.1015	0.921	84.562	0.8765	0.0666	0.8845
														85.1542	0.9249	0.0877	0.9215	85.0462	0.8816	0.0698	0.8848
														85.6384	0.934	0.0853	0.922	85.5304	0.8853	0.06	0.8851
														86.1226	0.9226	0.0841	0.9225	86.0146	0.8794	0.0213	0.8855
														86.6068	0.931	0.0765	0.923	86.4988	0.8789	0.0514	0.8858
														87.091	0.919	0.0943	0.9235	86.983	0.8818	0.0594	0.8861
														87.5752	0.9272	0.087	0.924	87.4672	0.8943	0.0524	0.8864
														88.0594	0.9099	0.0958	0.9245	87.9514	0.8923	0.0735	0.8867
														88.5436	0.9007	0.0832	0.925	88.4356	0.8855	0.056	0.887
														89.0278	0.9127	0.1168	0.9254	88.9198	0.8964	0.0587	0.8873
														89.512	0.9032	0.0866	0.9259	89.404	0.8763	0.0712	0.8876
														89.9962	0.9238	0.1068	0.9264	89.8882	0.8714	0.0736	0.8879

## Sheet: Figure 3
OD (350nm) and Fluorescence intensity as a function of time (panel 3A)																	FRAP signal at different time points (panel 3C-3H)
	WT				DM				P33A								WT@ 0min				WT@ 30min				WT@ 60min				DM@ 0min				DM@ 30min				DM@ 60min
Time(min)	OD 350 nm	Error	ThT flu	Error	OD 350 nm	Error	ThT flu	Error	OD 350 nm	Error	ThT flu	Error		Time (sec)			Time (sec)	Fractional Recovery	error	fit	Time (sec)	Fractional Recovery	error	fit	Time (sec)	Fractional Recovery	error	fit	Time (sec)	Fractional Recovery	error	fit	Time (sec)	Fractional Recovery	error	fit	Time (sec)	Fractional Recovery	error	fit		WT t-half @ 0min	WT t-half @ 30min	WT t-half @ 60min		DM t-half @ 0min	DM t-half @ 30min	DM t-half @ 60min
1	1.227	0.147	7.5	8.5	1.028	0.001	8.5	5.5	1.024	0.07	547.5	14.5		-1.2803	-0.0003		0.0017	1	0		-0.0003	1	0		-0.0003	1	0		-0.0003	1	0		-0.0003	1	0		-0.0003	1	0		t-half	6.56	0.46	0.49	t-half	5.87	5.5	10
8	1.074	0.125	8.5	2.5	0.877	0.033	9	3	1.0725	0.0205	595	34		-0.7961	0.4839		0.4859	1.0071	0.0398		0.4839	0.9821	0.0433		0.4839	0.992	0.0121		0.4839	1.0153	0.0148		0.4839	0.9821	0.074		0.4839	0.9933	0.04			7.3	0.78	0.73		4.05	5.94	7.93
15	0.9535	0.1295	13.5	8.5	0.7745	0.0285	8.5	4.5	1.1095	0.0005	587	59		0	1.28		1.39	0	0	0.0372	1.28	0	0	0.0124	1.28	0	0	0.00030141	1.28	0	0	0.1033	1.28	0	0	0.051	1.28	0	0	0.0401		9.01	1.41	0.81		3.75	7.16	14.28
22	0.8585	0.1295	21	2	0.6735	0.0375	8.5	5.5	1.116	0.025	553	78		0.4842	1.7642		1.8742	0.0921	0.052	0.0893	1.7642	0.1274	0.0813	0.1142	1.7642	0.1673	0.0327	0.1671	1.7642	0.1343	0.0385	0.1459	1.7642	0.1274	0.0177	0.1159	1.7642	0.0776	0.0151	0.0716		3.16	2.03	0.99		5.5	4.28	10.56
29	0.7745	0.1305	31	8	0.621	0.015	7.5	2.5	1.1245	0.0555	548	57		0.9684	2.2484		2.3584	0.1538	0.0755	0.1372	2.2484	0.1993	0.0891	0.1838	2.2484	0.2419	0.0161	0.2427	2.2484	0.191	0.0512	0.1854	2.2484	0.1993	0.0116	0.1734	2.2484	0.1115	0.0248	0.1015		3.77	2.82	0.94		7	5.04	11.94
36	0.722	0.133	65.5	31.5	0.572	0.002	5	2	1.1465	0.0775	548	65		1.4526	2.7326		2.8426	0.1943	0.0837	0.1813	2.7326	0.234	0.0719	0.2315	2.7326	0.287	0.0208	0.2775	2.7326	0.2406	0.0448	0.2221	2.7326	0.234	0.0337	0.2243	2.7326	0.141	0.0307	0.1299	Average thalf	5.96	1.5	0.792	Average thalf	5.244	5.584	10.942
43	0.711	0.147	131.5	57.5	0.5335	0.0075	6	1	1.166	0.086	577.5	42.5		1.9368	3.2168		3.3268	0.2391	0.075	0.2219	3.2168	0.2597	0.0771	0.2644	3.2168	0.2869	0.0347	0.2941	3.2168	0.2903	0.0434	0.2563	3.2168	0.2597	0.0522	0.2696	3.2168	0.1682	0.0205	0.157	Error	2.4543	0.9528	0.1978	Error	1.3441	1.074	2.3582
50	0.716	0.139	192.5	61.5	0.5105	0.0095	5	2	1.1745	0.1025	591.5	44.5		2.421	3.701		3.811	0.2778	0.0887	0.2594	3.701	0.2771	0.0541	0.2872	3.701	0.2945	0.0306	0.3023	3.701	0.3132	0.0558	0.2882	3.701	0.2771	0.0612	0.3098	3.701	0.1966	0.031	0.1827
57	0.729	0.132	239	51	0.478	0.014	7	1	1.1905	0.1105	636.5	43.5		2.9052	4.1852		4.2952	0.3118	0.0691	0.2939	4.1852	0.2967	0.0528	0.3032	4.1852	0.3045	0.0407	0.3069	4.1852	0.3418	0.0483	0.3179	4.1852	0.2967	0.0849	0.3458	4.1852	0.2105	0.0271	0.2072
64	0.7395	0.1215	288.5	26.5	0.4565	0.0075	8.5	2.5	1.202	0.114	666	66		3.3894	4.6694		4.7794	0.3394	0.0669	0.3258	4.6694	0.3092	0.0513	0.3146	4.6694	0.2993	0.0374	0.3098	4.6694	0.3599	0.0539	0.3455	4.6694	0.3092	0.1054	0.3779	4.6694	0.2426	0.0407	0.2306
71	0.748	0.114	329	7	0.44	0.006	6	1	1.205	0.128	711	86		3.8736	5.1536		5.2636	0.3698	0.0687	0.3552	5.1536	0.3042	0.039	0.3229	5.1536	0.3069	0.0351	0.312	5.1536	0.3822	0.0478	0.3713	5.1536	0.3042	0.1153	0.4068	5.1536	0.2541	0.0465	0.2528
78	0.7545	0.1095	369.5	8.5	0.4215	0.0135	6	0	1.219	0.132	746	99		4.3578	5.6378		5.7478	0.3973	0.0568	0.3824	5.6378	0.3294	0.0305	0.329	5.6378	0.3158	0.0334	0.3138	5.6378	0.421	0.0576	0.3954	5.6378	0.3294	0.1412	0.4327	5.6378	0.2745	0.0286	0.274
85	0.766	0.103	398	11	0.4015	0.0145	20	7	1.2295	0.1375	775	122		4.842	6.122		6.232	0.4126	0.0655	0.4075	6.122	0.3333	0.038	0.3337	6.122	0.3138	0.044	0.3155	6.122	0.442	0.0343	0.4179	6.122	0.3333	0.1334	0.4561	6.122	0.3011	0.0378	0.2943
92	0.7735	0.0995	424	17	0.3865	0.0255	17	7	1.238	0.141	817	138		5.3262	6.6062		6.7162	0.4204	0.0687	0.4308	6.6062	0.3344	0.0347	0.3375	6.6062	0.315	0.04	0.3171	6.6062	0.4462	0.0451	0.4389	6.6062	0.3344	0.1581	0.4773	6.6062	0.3016	0.0534	0.3136
99	0.7805	0.0935	449	10	0.3665	0.0275	12.5	2.5	1.2435	0.1455	841	153		5.8104	7.0904		7.2004	0.455	0.0459	0.4524	7.0904	0.3359	0.0245	0.3405	7.0904	0.3189	0.0382	0.3186	7.0904	0.4659	0.0552	0.4585	7.0904	0.3359	0.1826	0.4966	7.0904	0.3382	0.0548	0.332
106	0.7875	0.0895	476	14	0.3535	0.0345	10.5	0.5	1.2515	0.1495	871	156		6.2946	7.5746		7.6846	0.4732	0.0543	0.4724	7.5746	0.3403	0.0192	0.3431	7.5746	0.3175	0.0356	0.3201	7.5746	0.4909	0.0461	0.4769	7.5746	0.3403	0.1847	0.5141	7.5746	0.3465	0.038	0.3496
113	0.795	0.084	497.5	14.5	0.3435	0.0465	11.5	0.5	1.2545	0.1595	895.5	154.5		6.7787	8.0587		8.1687	0.4936	0.0594	0.491	8.0587	0.3434	0.0354	0.3453	8.0587	0.3211	0.0298	0.3216	8.0587	0.502	0.0465	0.4941	8.0587	0.3434	0.1971	0.5302	8.0587	0.3674	0.0434	0.3663
120	0.8	0.082	511.5	11.5	0.3295	0.0485	11	2	1.2655	0.1615	914.5	153.5		7.2629	8.5429		8.6529	0.5019	0.029	0.5083	8.5429	0.3498	0.0267	0.3474	8.5429	0.3287	0.0436	0.323	8.5429	0.5008	0.0519	0.5102	8.5429	0.3498	0.1964	0.5449	8.5429	0.3583	0.0474	0.3824
127	0.807	0.077	533.5	14.5	0.3235	0.0535	12	1	1.2715	0.1625	930	163		7.7471	9.0271		9.1371	0.5008	0.0709	0.5244	9.0271	0.3428	0.036	0.3493	9.0271	0.3181	0.0374	0.3245	9.0271	0.5294	0.0412	0.5253	9.0271	0.3428	0.2259	0.5585	9.0271	0.3953	0.0259	0.3978
134	0.812	0.073	549.5	15.5	0.308	0.062	16.5	1.5	1.274	0.17	955	164		8.2313	9.5113		9.6213	0.5342	0.0518	0.5394	9.5113	0.3538	0.0226	0.3511	9.5113	0.3194	0.0351	0.3259	9.5113	0.5547	0.0547	0.5395	9.5113	0.3538	0.2327	0.5711	9.5113	0.4113	0.0532	0.4125
141	0.816	0.072	561.5	12.5	0.303	0.06	11.5	0.5	1.279	0.174	977.5	157.5		8.7155	9.9955		10.1055	0.537	0.0504	0.5534	9.9955	0.3491	0.0263	0.3528	9.9955	0.3305	0.0322	0.3273	9.9955	0.5583	0.0481	0.5528	9.9955	0.3491	0.2551	0.5827	9.9955	0.4371	0.0552	0.4265
148	0.82	0.07	583	17	0.2885	0.0625	16.5	3.5	1.283	0.178	989.5	155.5		9.1997	10.4797		10.5897	0.5575	0.04	0.5664	10.4797	0.3569	0.0303	0.3544	10.4797	0.3325	0.0347	0.3287	10.4797	0.5773	0.0517	0.5653	10.4797	0.3569	0.2445	0.5936	10.4797	0.4414	0.0504	0.44
155	0.824	0.067	596	21	0.28	0.064	20	7	1.284	0.181	1005.5	152.5		9.6839	10.9639		11.0739	0.5834	0.0538	0.5787	10.9639	0.3562	0.026	0.356	10.9639	0.3299	0.0313	0.3301	10.9639	0.5699	0.0306	0.5771	10.9639	0.3562	0.2933	0.6038	10.9639	0.4441	0.0383	0.4529
162	0.828	0.065	601	21	0.2665	0.0585	21.5	7.5	1.2865	0.1835	1027	149		10.1681	11.4481		11.5581	0.582	0.0514	0.5901	11.4481	0.3596	0.0181	0.3576	11.4481	0.3367	0.0301	0.3315	11.4481	0.575	0.0486	0.5882	11.4481	0.3596	0.275	0.6133	11.4481	0.451	0.0623	0.4653
169	0.8295	0.0635	623	36	0.254	0.052	25	10	1.2925	0.1855	1031	145		10.6523	11.9323		12.0423	0.5874	0.0486	0.6008	11.9323	0.3578	0.022	0.3591	11.9323	0.3291	0.0335	0.3328	11.9323	0.6027	0.056	0.5987	11.9323	0.3578	0.2814	0.6223	11.9323	0.4727	0.0673	0.4772
176	0.834	0.063	633.5	33.5	0.24	0.049	25	7	1.292	0.187	1045	140		11.1365	12.4165		12.5265	0.5952	0.0519	0.6109	12.4165	0.3551	0.0253	0.3606	12.4165	0.3311	0.028	0.3342	12.4165	0.6066	0.0331	0.6086	12.4165	0.3551	0.3082	0.6307	12.4165	0.498	0.0424	0.4886
183	0.8365	0.0615	652.5	39.5	0.2295	0.0515	26.5	8.5	1.2955	0.1915	1060	136		11.6207	12.9007		13.0107	0.6143	0.0358	0.6204	12.9007	0.3659	0.0237	0.3621	12.9007	0.337	0.0302	0.3355	12.9007	0.6139	0.0556	0.6179	12.9007	0.3659	0.288	0.6388	12.9007	0.519	0.0508	0.4995
190	0.839	0.059	658.5	48.5	0.221	0.047	24	6	1.2985	0.1935	1072	128		12.1049	13.3849		13.4949	0.6298	0.0521	0.6293	13.3849	0.3689	0.0182	0.3636	13.3849	0.3445	0.0278	0.3368	13.3849	0.6074	0.0537	0.6267	13.3849	0.3689	0.2887	0.6464	13.3849	0.5048	0.071	0.51
197	0.842	0.059	670.5	56.5	0.212	0.041	27.5	10.5	1.301	0.193	1089.5	115.5		12.5891	13.8691		13.9791	0.6231	0.0632	0.6377	13.8691	0.3669	0.0229	0.365	13.8691	0.3395	0.035	0.3382	13.8691	0.624	0.0488	0.6351	13.8691	0.3669	0.2946	0.6536	13.8691	0.5193	0.0565	0.5202
204	0.8455	0.0565	675.5	49.5	0.2045	0.0435	29	11	1.303	0.194	1091.5	118.5		13.0733	14.3533		14.4633	0.6338	0.0276	0.6457	14.3533	0.3616	0.0124	0.3664	14.3533	0.3401	0.0344	0.3395	14.3533	0.6313	0.0576	0.643	14.3533	0.3616	0.3302	0.6606	14.3533	0.5342	0.0497	0.5299
211	0.8455	0.0565	686	50	0.1975	0.0425	32	12	1.305	0.195	1110.5	100.5		13.5575	14.8375		14.9475	0.6515	0.0552	0.6532	14.8375	0.3718	0.0254	0.3679	14.8375	0.3455	0.0283	0.3407	14.8375	0.6441	0.055	0.6505	14.8375	0.3718	0.3509	0.6672	14.8375	0.5349	0.0563	0.5393
218	0.849	0.055	697.5	67.5	0.1875	0.0385	39	16	1.306	0.197	1118.5	100.5		14.0417	15.3217		15.4317	0.6544	0.0608	0.6603	15.3217	0.374	0.0207	0.3693	15.3217	0.3487	0.031	0.342	15.3217	0.6587	0.0332	0.6576	15.3217	0.374	0.3283	0.6736	15.3217	0.5301	0.0531	0.5483
225	0.8495	0.0545	712	70	0.1785	0.0345	35.5	14.5	1.3065	0.1995	1139	83		14.5259	15.8059		15.9159	0.6526	0.0487	0.6671	15.8059	0.375	0.0287	0.3707	15.8059	0.3412	0.0304	0.3433	15.8059	0.6681	0.037	0.6644	15.8059	0.375	0.3242	0.6798	15.8059	0.5459	0.0416	0.557
232	0.8515	0.0545	708	66	0.1715	0.0325	39	17	1.3075	0.1995	1150	74		15.0101	16.2901		16.4001	0.6586	0.0568	0.6735	16.2901	0.3782	0.028	0.372	16.2901	0.3533	0.0392	0.3445	16.2901	0.6709	0.0285	0.6708	16.2901	0.3782	0.3393	0.6857	16.2901	0.5732	0.0327	0.5654
239	0.8515	0.0535	718.5	77.5	0.163	0.029	40	19	1.3085	0.2015	1158.5	71.5		15.4943	16.7743		16.8843	0.6592	0.0617	0.6796	16.7743	0.3749	0.0148	0.3734	16.7743	0.3482	0.0309	0.3457	16.7743	0.6649	0.0506	0.6769	16.7743	0.3749	0.3454	0.6914	16.7743	0.5679	0.0507	0.5735
246	0.8555	0.0515	722.5	77.5	0.157	0.027	46	24	1.3105	0.2025	1164.5	65.5		15.9785	17.2585		17.3685	0.6924	0.0572	0.6855	17.2585	0.3797	0.0228	0.3748	17.2585	0.3493	0.0308	0.347	17.2585	0.6694	0.0643	0.6828	17.2585	0.3797	0.3403	0.6969	17.2585	0.573	0.037	0.5814
253	0.8555	0.0525	734	88	0.151	0.026	50.5	26.5	1.31	0.203	1176.5	57.5		16.4627	17.7427		17.8527	0.692	0.0629	0.6911	17.7427	0.3737	0.0251	0.3761	17.7427	0.3515	0.0363	0.3482	17.7427	0.6664	0.0402	0.6883	17.7427	0.3737	0.3721	0.7023	17.7427	0.582	0.032	0.5889
260	0.857	0.051	734.5	86.5	0.1465	0.0245	49.5	23.5	1.312	0.203	1195.5	40.5		16.9469	18.2269		18.3369	0.7019	0.0596	0.6964	18.2269	0.381	0.0274	0.3774	18.2269	0.358	0.0358	0.3494	18.2269	0.6893	0.0464	0.6937	18.2269	0.381	0.3706	0.7075	18.2269	0.5845	0.0436	0.5963
267	0.858	0.051	739	87	0.1445	0.0205	54	29	1.3155	0.2005	1193	44		17.4311	18.7111		18.8211	0.7019	0.0581	0.7015	18.7111	0.3871	0.0193	0.3787	18.7111	0.3505	0.0226	0.3505	18.7111	0.6877	0.0287	0.6988	18.7111	0.3871	0.3548	0.7125	18.7111	0.5975	0.0436	0.6033
274	0.859	0.05	742	91	0.1405	0.0215	57	30	1.317	0.2	1209	25		17.9153	19.1953		19.3053	0.6996	0.0706	0.7064	19.1953	0.3835	0.0319	0.38	19.1953	0.3612	0.0433	0.3517	19.1953	0.6856	0.0474	0.7036	19.1953	0.3835	0.3811	0.7174	19.1953	0.6157	0.046	0.6102
281	0.859	0.051	746.5	90.5	0.136	0.02	59.5	33.5	1.316	0.202	1221.5	25.5		18.3995	19.6795		19.7895	0.6943	0.0698	0.7111	19.6795	0.3809	0.0192	0.3813	19.6795	0.3577	0.0343	0.3529	19.6795	0.704	0.0361	0.7083	19.6795	0.3809	0.3888	0.7222	19.6795	0.6059	0.0444	0.6168
288	0.861	0.05	746.5	92.5	0.132	0.021	68	40	1.315	0.203	1232.5	8.5		18.8836	20.1636		20.2736	0.7095	0.0728	0.7156	20.1636	0.3896	0.0178	0.3826	20.1636	0.354	0.027	0.354	20.1636	0.7036	0.041	0.7128	20.1636	0.3896	0.379	0.7268	20.1636	0.6344	0.0503	0.6233
295	0.861	0.05	750.5	95.5	0.131	0.02	66.5	41.5	1.317	0.201	1240	4		19.3678	20.6478		20.7578	0.7112	0.0727	0.7199	20.6478	0.388	0.0163	0.3838	20.6478	0.3575	0.0329	0.3552	20.6478	0.7124	0.0593	0.7171	20.6478	0.388	0.3849	0.7314	20.6478	0.6218	0.0634	0.6295
302	0.861	0.051	756.5	98.5	0.129	0.02	73	41	1.318	0.201	1251	4		19.852	21.132		21.242	0.7349	0.0486	0.7241	21.132	0.3764	0.0239	0.3851	21.132	0.3588	0.0378	0.3563	21.132	0.7039	0.0411	0.7212	21.132	0.3764	0.3912	0.7358	21.132	0.6355	0.0466	0.6356
309	0.8635	0.0495	761.5	99.5	0.124	0.024	76.5	45.5	1.3155	0.2025	1254	5		20.3362	21.6162		21.7262	0.7284	0.0742	0.7282	21.6162	0.3926	0.0225	0.3863	21.6162	0.3592	0.0292	0.3574	21.6162	0.7	0.048	0.7252	21.6162	0.3926	0.3814	0.7401	21.6162	0.657	0.0464	0.6415
316	0.864	0.049	755	100	0.123	0.024	77	48	1.3165	0.2045	1254.5	7.5		20.8204	22.1004		22.2104	0.7316	0.0804	0.7321	22.1004	0.3895	0.0223	0.3876	22.1004	0.3652	0.0312	0.3585	22.1004	0.7267	0.0587	0.729	22.1004	0.3895	0.3653	0.7443	22.1004	0.6539	0.0399	0.6472
323	0.8635	0.0495	763.5	103.5	0.124	0.022	89	56	1.3185	0.2025	1270.5	22.5		21.3046	22.5846		22.6946	0.7412	0.0821	0.7359	22.5846	0.3825	0.0212	0.3888	22.5846	0.3639	0.0292	0.3596	22.5846	0.7209	0.0466	0.7327	22.5846	0.3825	0.4312	0.7484	22.5846	0.6551	0.0464	0.6527
330	0.8655	0.0495	769.5	110.5	0.1225	0.0225	94.5	61.5	1.319	0.201	1270	20		21.7888	23.0688		23.1788	0.7527	0.0757	0.7395	23.0688	0.4013	0.0092	0.39	23.0688	0.3532	0.0346	0.3607	23.0688	0.7416	0.0331	0.7363	23.0688	0.4013	0.3916	0.7525	23.0688	0.6493	0.0374	0.6581
337	0.865	0.049	778	111	0.121	0.023	107.5	72.5	1.32	0.203	1261	28		22.273	23.553		23.663	0.7529	0.0717	0.7431	23.553	0.3975	0.0251	0.3911	23.553	0.3655	0.0277	0.3618	23.553	0.7228	0.033	0.7397	23.553	0.3975	0.4091	0.7564	23.553	0.6737	0.0451	0.6634
344	0.8655	0.0495	768	102	0.1205	0.0235	102.5	68.5	1.3195	0.2025	1292	40		22.7572	24.0372		24.1472	0.7483	0.0845	0.7466	24.0372	0.3945	0.0229	0.3923	24.0372	0.3602	0.032	0.3628	24.0372	0.7293	0.0368	0.7431	24.0372	0.3945	0.3916	0.7603	24.0372	0.6716	0.0457	0.6685
351	0.865	0.05	772.5	108.5	0.1175	0.0255	103.5	70.5	1.319	0.204	1286.5	36.5		23.2414	24.5214		24.6314	0.7543	0.0644	0.7499	24.5214	0.4013	0.0211	0.3935	24.5214	0.3592	0.0286	0.3639	24.5214	0.7422	0.0388	0.7463	24.5214	0.4013	0.3933	0.764	24.5214	0.6793	0.0353	0.6735
358	0.8655	0.0495	768	105	0.1165	0.0275	115	76	1.319	0.206	1294.5	37.5		23.7256	25.0056		25.1156	0.7607	0.0623	0.7532	25.0056	0.3908	0.0231	0.3946	25.0056	0.371	0.0289	0.3649	25.0056	0.7309	0.0283	0.7494	25.0056	0.3908	0.4128	0.7677	25.0056	0.6634	0.0374	0.6784
365	0.8665	0.0495	769	110	0.1165	0.0275	115	82	1.32	0.204	1299.5	49.5		24.2098	25.4898		25.5998	0.7462	0.0645	0.7564	25.4898	0.4004	0.0166	0.3958	25.4898	0.3634	0.024	0.3659	25.4898	0.7443	0.0357	0.7524	25.4898	0.4004	0.4133	0.7713	25.4898	0.6868	0.0324	0.6832
372	0.8665	0.0505	775.5	109.5	0.115	0.027	118.5	79.5	1.32	0.205	1302.5	47.5		24.694	25.974		26.084	0.7561	0.0799	0.7595	25.974	0.3962	0.0278	0.3969	25.974	0.3625	0.0269	0.367	25.974	0.745	0.0467	0.7553	25.974	0.3962	0.4381	0.7749	25.974	0.702	0.0553	0.6878
379	0.8675	0.0495	776	105	0.117	0.026	127	84	1.3225	0.2025	1308	48		25.1782	26.4582		26.5682	0.7758	0.071	0.7625	26.4582	0.4067	0.0227	0.398	26.4582	0.3622	0.0325	0.368	26.4582	0.766	0.0345	0.7582	26.4582	0.4067	0.393	0.7784	26.4582	0.7184	0.0535	0.6923
386	0.869	0.05	770.5	106.5	0.1155	0.0275	132	93	1.3215	0.2045	1306.5	56.5		25.6624	26.9424		27.0524	0.7631	0.0708	0.7654	26.9424	0.4037	0.0276	0.3991	26.9424	0.3737	0.0255	0.369	26.9424	0.772	0.0371	0.7609	26.9424	0.4037	0.4249	0.7818	26.9424	0.7065	0.0495	0.6967
393	0.8685	0.0495	775.5	103.5	0.1145	0.0295	137	96	1.3215	0.2055	1310.5	58.5		26.1466	27.4266		27.5366	0.7716	0.0763	0.7683	27.4266	0.4073	0.03	0.4002	27.4266	0.3652	0.0331	0.37	27.4266	0.76	0.0229	0.7636	27.4266	0.4073	0.4179	0.7851	27.4266	0.7169	0.0481	0.7011
400	0.869	0.049	776	111	0.1125	0.0305	138	95	1.321	0.206	1318	66		26.6308	27.9108		28.0208	0.7865	0.0646	0.7711	27.9108	0.4008	0.0183	0.4013	27.9108	0.3762	0.0333	0.3709	27.9108	0.7823	0.024	0.7662	27.9108	0.4008	0.4263	0.7884	27.9108	0.708	0.0346	0.7053
407	0.8695	0.0495	782.5	111.5	0.113	0.03	138	100	1.3225	0.2055	1313	66		27.115	28.395		28.505	0.7832	0.0757	0.7739	28.395	0.3982	0.0164	0.4024	28.395	0.3681	0.0351	0.3719	28.395	0.768	0.04	0.7688	28.395	0.3982	0.4248	0.7916	28.395	0.7115	0.079	0.7094
414	0.8695	0.0495	780.5	112.5	0.1135	0.0295	147.5	106.5	1.324	0.205	1326	73		27.5992	28.8792		28.9892	0.7888	0.076	0.7766	28.8792	0.3979	0.0176	0.4034	28.8792	0.3792	0.0378	0.3729	28.8792	0.763	0.0321	0.7712	28.8792	0.3979	0.4332	0.7947	28.8792	0.7114	0.0469	0.7135
421	0.87	0.05	776	108	0.114	0.029	149	105	1.3245	0.2035	1333.5	74.5		28.0834	29.3634		29.4734	0.7845	0.0701	0.7792	29.3634	0.4066	0.0106	0.4045	29.3634	0.3713	0.032	0.3738	29.3634	0.7808	0.0308	0.7736	29.3634	0.4066	0.4121	0.7978	29.3634	0.7453	0.0457	0.7175
428	0.8705	0.0495	773	100	0.1135	0.0295	150	106	1.3255	0.2045	1330	71		28.5676	29.8476		29.9576	0.7809	0.0705	0.7818	29.8476	0.4074	0.0197	0.4055	29.8476	0.3746	0.0313	0.3748	29.8476	0.7956	0.0348	0.776	29.8476	0.4074	0.4447	0.8009	29.8476	0.7277	0.0324	0.7213
435	0.8705	0.0505	790	115	0.1125	0.0305	154.5	109.5	1.325	0.204	1327.5	77.5		29.0518	30.3318		30.4418	0.7807	0.072	0.7843	30.3318	0.4065	0.0169	0.4066	30.3318	0.3745	0.0341	0.3757	30.3318	0.7831	0.0422	0.7783	30.3318	0.4065	0.4373	0.8038	30.3318	0.7062	0.0334	0.7252
442	0.871	0.05	789.5	117.5	0.113	0.03	162	114	1.326	0.204	1343	83		29.536	30.816		30.926	0.7808	0.0662	0.7868	30.816	0.4135	0.0173	0.4076	30.816	0.3777	0.0359	0.3766	30.816	0.7666	0.0217	0.7805	30.816	0.4135	0.4324	0.8068	30.816	0.741	0.0492	0.7289
449	0.872	0.05	783.5	105.5	0.1125	0.0305	158	111	1.3265	0.2045	1340.5	83.5		30.0202	31.3002		31.4102	0.7962	0.0737	0.7892	31.3002	0.4088	0.0207	0.4086	31.3002	0.3823	0.0279	0.3775	31.3002	0.796	0.0372	0.7827	31.3002	0.4088	0.4449	0.8096	31.3002	0.7268	0.0508	0.7326
456	0.8715	0.0495	785.5	107.5	0.112	0.031	159	112	1.3275	0.2045	1340	91		30.5044	31.7844		31.8944	0.8078	0.0835	0.7916	31.7844	0.4133	0.0149	0.4096	31.7844	0.3848	0.0387	0.3784	31.7844	0.7868	0.0316	0.7848	31.7844	0.4133	0.4148	0.8124	31.7844	0.7228	0.0139	0.7362
463	0.8715	0.0505	791	116	0.112	0.031	163.5	112.5	1.3275	0.2045	1344.5	88.5		30.9885	32.2685		32.3785	0.7987	0.0769	0.794	32.2685	0.4138	0.0261	0.4106	32.2685	0.3697	0.0303	0.3793	32.2685	0.7898	0.0367	0.7869	32.2685	0.4138	0.4107	0.8152	32.2685	0.7263	0.0422	0.7397
470	0.8725	0.0505	781.5	109.5	0.112	0.031	165	113	1.3275	0.2045	1345	84		31.4727	32.7527		32.8627	0.7956	0.0849	0.7963	32.7527	0.4202	0.0169	0.4116	32.7527	0.3787	0.0333	0.3802	32.7527	0.7855	0.0158	0.7889	32.7527	0.4202	0.4388	0.8179	32.7527	0.7329	0.0344	0.7431
477	0.873	0.05	792	123	0.1095	0.0335	172	121	1.3265	0.2065	1352	98		31.9569	33.2369		33.3469	0.8032	0.0791	0.7985	33.2369	0.4078	0.0236	0.4126	33.2369	0.3845	0.035	0.3811	33.2369	0.7895	0.0197	0.7909	33.2369	0.4078	0.4428	0.8205	33.2369	0.7435	0.0397	0.7466
484	0.8725	0.0505	794	118	0.1095	0.0335	171	122	1.327	0.207	1350	103		32.4411	33.7211		33.8311	0.8031	0.0836	0.8007	33.7211	0.4189	0.0191	0.4135	33.7211	0.3762	0.0279	0.382	33.7211	0.7959	0.05	0.7928	33.7211	0.4189	0.4152	0.8231	33.7211	0.7394	0.0434	0.7499
491	0.8735	0.0505	784	107	0.1085	0.0345	168	118	1.326	0.207	1355	99		32.9253	34.2053		34.3153	0.8089	0.0836	0.8029	34.2053	0.4166	0.0295	0.4145	34.2053	0.3859	0.0272	0.3828	34.2053	0.774	0.0508	0.7947	34.2053	0.4166	0.4404	0.8257	34.2053	0.7759	0.0602	0.7532
498	0.874	0.051	797.5	120.5	0.109	0.034	169	119	1.327	0.207	1348	102		33.4095	34.6895		34.7995	0.8082	0.0824	0.8051	34.6895	0.4134	0.0183	0.4154	34.6895	0.3806	0.0278	0.3837	34.6895	0.818	0.048	0.7966	34.6895	0.4134	0.4511	0.8282	34.6895	0.7726	0.0521	0.7564
505	0.874	0.051	797	118	0.111	0.032	172.5	119.5	1.329	0.204	1368.5	109.5		33.8937	35.1737		35.2837	0.8073	0.0665	0.8072	35.1737	0.4185	0.0197	0.4164	35.1737	0.3836	0.0268	0.3845	35.1737	0.8084	0.0363	0.7984	35.1737	0.4185	0.4415	0.8306	35.1737	0.7593	0.0519	0.7596
512	0.8745	0.0515	785.5	112.5	0.111	0.032	175.5	121.5	1.33	0.205	1363.5	108.5		34.3779	35.6579		35.7679	0.8312	0.0914	0.8093	35.6579	0.4226	0.021	0.4173	35.6579	0.3892	0.0256	0.3854	35.6579	0.8354	0.043	0.8002	35.6579	0.4226	0.4309	0.833	35.6579	0.7575	0.061	0.7627
519	0.8745	0.0515	792	118	0.1105	0.0325	181	121	1.33	0.205	1367.5	116.5		34.8621	36.1421		36.2521	0.8124	0.0864	0.8113	36.1421	0.4179	0.0165	0.4182	36.1421	0.3833	0.0317	0.3862	36.1421	0.8151	0.045	0.8019	36.1421	0.4179	0.4354	0.8354	36.1421	0.7728	0.0382	0.7658
526	0.8755	0.0515	791.5	112.5	0.1105	0.0325	176	120	1.3305	0.2055	1360.5	110.5		35.3463	36.6263		36.7363	0.7915	0.084	0.8133	36.6263	0.4182	0.0186	0.4191	36.6263	0.3787	0.0236	0.387	36.6263	0.8202	0.0486	0.8036	36.6263	0.4182	0.444	0.8377	36.6263	0.754	0.0194	0.7689
533	0.8755	0.0515	793	116	0.1105	0.0325	186.5	128.5	1.33	0.205	1375.5	120.5		35.8305	37.1105		37.2205	0.8233	0.0879	0.8153	37.1105	0.4182	0.024	0.42	37.1105	0.3872	0.0409	0.3878	37.1105	0.7926	0.0363	0.8053	37.1105	0.4182	0.443	0.84	37.1105	0.7561	0.0366	0.7718
540	0.876	0.052	795	120	0.11	0.033	185.5	125.5	1.3315	0.2055	1377.5	123.5		36.3147	37.5947		37.7047	0.8271	0.0942	0.8173	37.5947	0.423	0.0122	0.4209	37.5947	0.3825	0.0276	0.3886	37.5947	0.8206	0.0572	0.807	37.5947	0.423	0.4579	0.8422	37.5947	0.7577	0.0632	0.7748
547	0.8755	0.0525	788.5	117.5	0.11	0.032	185	123	1.331	0.205	1370.5	118.5		36.7989	38.0789		38.1889	0.8047	0.1071	0.8192	38.0789	0.4089	0.0261	0.4218	38.0789	0.3786	0.0262	0.3894	38.0789	0.8067	0.0533	0.8086	38.0789	0.4089	0.4669	0.8444	38.0789	0.8	0.0617	0.7777
554	0.8765	0.0525	793.5	125.5	0.11	0.033	193	133	1.3315	0.2055	1376.5	128.5		37.2831	38.5631		38.6731	0.8285	0.0761	0.8211	38.5631	0.4217	0.0193	0.4227	38.5631	0.3791	0.0205	0.3902	38.5631	0.8187	0.0416	0.8102	38.5631	0.4217	0.4341	0.8466	38.5631	0.7955	0.024	0.7806
561	0.8765	0.0525	800.5	131.5	0.11	0.033	187	128	1.3315	0.2055	1380	130		37.7673	39.0473		39.1573	0.832	0.0964	0.823	39.0473	0.4219	0.0099	0.4235	39.0473	0.3888	0.0267	0.391	39.0473	0.8192	0.0356	0.8117	39.0473	0.4219	0.4326	0.8487	39.0473	0.7641	0.049	0.7834
568	0.8765	0.0525	787.5	123.5	0.1095	0.0335	186.5	124.5	1.331	0.205	1381.5	122.5		38.2515	39.5315		39.6415	0.8451	0.0783	0.8248	39.5315	0.4183	0.0257	0.4244	39.5315	0.3943	0.0285	0.3918	39.5315	0.8197	0.0348	0.8132	39.5315	0.4183	0.4571	0.8508	39.5315	0.7781	0.0554	0.7862
575	0.8775	0.0525	799	123	0.1095	0.0335	192.5	131.5	1.332	0.206	1384.5	129.5		38.7357	40.0157		40.1257	0.8202	0.0875	0.8266	40.0157	0.4285	0.0161	0.4252	40.0157	0.3866	0.0316	0.3925	40.0157	0.8246	0.0425	0.8147	40.0157	0.4285	0.457	0.8528	40.0157	0.7857	0.0458	0.7889
582	0.878	0.053	800.5	125.5	0.11	0.033	194.5	131.5	1.3325	0.2065	1388	134		39.2199	40.4999		40.6099	0.8374	0.0744	0.8284	40.4999	0.4223	0.0192	0.4261	40.4999	0.3891	0.0346	0.3933	40.4999	0.8315	0.0366	0.8162	40.4999	0.4223	0.468	0.8548	40.4999	0.7893	0.0628	0.7916
589	0.8775	0.0535	799.5	127.5	0.1095	0.0335	191.5	126.5	1.332	0.206	1384.5	140.5		39.7041	40.9841		41.0941	0.8485	0.1019	0.8302	40.9841	0.4241	0.0158	0.4269	40.9841	0.3927	0.0323	0.394	40.9841	0.8138	0.0526	0.8176	40.9841	0.4241	0.453	0.8568	40.9841	0.7919	0.0445	0.7943
596	0.878	0.053	796.5	124.5	0.1095	0.0335	201	137	1.3325	0.2065	1392	153		40.1883	41.4683		41.5783	0.8313	0.0818	0.8319	41.4683	0.424	0.0226	0.4277	41.4683	0.3946	0.0313	0.3948	41.4683	0.8165	0.0287	0.8191	41.4683	0.424	0.482	0.8587	41.4683	0.7816	0.041	0.7969
603	0.878	0.053	803.5	133.5	0.1095	0.0335	197	130	1.3325	0.2065	1389.5	147.5		40.6725	41.9525		42.0625	0.8388	0.0783	0.8336	41.9525	0.4323	0.0224	0.4285	41.9525	0.3926	0.0224	0.3955	41.9525	0.8125	0.0434	0.8204	41.9525	0.4323	0.4577	0.8606	41.9525	0.8018	0.0436	0.7995
610	0.8785	0.0535	800	128	0.1095	0.0335	198	130	1.3335	0.2065	1398.5	153.5		41.1567	42.4367		42.5467	0.8353	0.0999	0.8353	42.4367	0.4293	0.015	0.4293	42.4367	0.4042	0.029	0.3962	42.4367	0.8256	0.0302	0.8218	42.4367	0.4293	0.4437	0.8625	42.4367	0.791	0.0344	0.8021
617	0.8785	0.0535	800	126	0.1095	0.0345	197.5	126.5	1.333	0.206	1407.5	153.5		41.6409	42.9209		43.0309	0.8431	0.0781	0.837	42.9209	0.4296	0.0191	0.4301	42.9209	0.3972	0.0242	0.3969	42.9209	0.8105	0.031	0.8232	42.9209	0.4296	0.4535	0.8643	42.9209	0.7969	0.0533	0.8046
624	0.879	0.054	792.5	124.5	0.1095	0.0335	199	130	1.333	0.207	1406	154		42.1251	43.4051		43.5151	0.8494	0.0727	0.8386	43.4051	0.4236	0.0267	0.4309	43.4051	0.4018	0.0318	0.3977	43.4051	0.8317	0.0567	0.8245	43.4051	0.4236	0.4377	0.8661	43.4051	0.8265	0.0348	0.8071
631	0.8795	0.0535	793.5	122.5	0.1095	0.0335	198.5	127.5	1.3325	0.2065	1412	162		42.6093	43.8893		43.9993	0.8327	0.0763	0.8402	43.8893	0.4265	0.01	0.4317	43.8893	0.3935	0.0308	0.3984	43.8893	0.8442	0.0397	0.8258	43.8893	0.4265	0.4826	0.8678	43.8893	0.7934	0.0445	0.8096
638	0.8795	0.0535	799	132	0.109	0.034	198	125	1.3335	0.2065	1399	158		43.0934	44.3734		44.4834	0.8291	0.0835	0.8418	44.3734	0.4257	0.0224	0.4325	44.3734	0.4018	0.0269	0.3991	44.3734	0.8185	0.0449	0.827	44.3734	0.4257	0.4733	0.8696	44.3734	0.8153	0.0468	0.812
645	0.8795	0.0545	801	122	0.109	0.034	198	129	1.3335	0.2065	1409.5	158.5		43.5776	44.8576		44.9676	0.8269	0.0812	0.8434	44.8576	0.429	0.0225	0.4332	44.8576	0.3961	0.0237	0.3998	44.8576	0.8262	0.036	0.8283	44.8576	0.429	0.4779	0.8712	44.8576	0.8374	0.0496	0.8144
652	0.88	0.054	800	129	0.109	0.034	199.5	130.5	1.334	0.207	1416.5	174.5		44.0618	45.3418		45.4518	0.8419	0.0769	0.8449	45.3418	0.4342	0.0236	0.434	45.3418	0.402	0.03	0.4004	45.3418	0.8192	0.0315	0.8295	45.3418	0.4342	0.4839	0.8729	45.3418	0.8148	0.038	0.8168
659	0.881	0.054	799.5	129.5	0.109	0.034	206	133	1.3335	0.2075	1407	170		44.546	45.826		45.936	0.8565	0.0742	0.8465	45.826	0.438	0.0097	0.4347	45.826	0.4024	0.0303	0.4011	45.826	0.8188	0.0369	0.8307	45.826	0.438	0.5087	0.8745	45.826	0.8156	0.0263	0.8191
666	0.8805	0.0545	796.5	121.5	0.11	0.034	203.5	127.5	1.3335	0.2075	1412	170		45.0302	46.3102		46.4202	0.8283	0.0776	0.848	46.3102	0.4272	0.0251	0.4355	46.3102	0.3956	0.0288	0.4018	46.3102	0.8229	0.0425	0.8319	46.3102	0.4272	0.5116	0.8761	46.3102	0.832	0.0347	0.8215
673	0.881	0.054	796.5	132.5	0.109	0.034	205	127	1.334	0.207	1416	172		45.5144	46.7944		46.9044	0.8491	0.0948	0.8495	46.7944	0.4381	0.0211	0.4362	46.7944	0.4105	0.0254	0.4025	46.7944	0.8241	0.0449	0.8331	46.7944	0.4381	0.4748	0.8777	46.7944	0.8283	0.0456	0.8237
680	0.8815	0.0545	794.5	124.5	0.109	0.034	204	129	1.334	0.207	1418	172		45.9986	47.2786		47.3886	0.851	0.0773	0.8509	47.2786	0.4404	0.013	0.437	47.2786	0.4015	0.0256	0.4031	47.2786	0.8373	0.0346	0.8342	47.2786	0.4404	0.4679	0.8792	47.2786	0.8391	0.0324	0.826
687	0.8815	0.0545	796.5	127.5	0.1085	0.0345	210	130	1.335	0.208	1430.5	189.5		46.4828	47.7628		47.8728	0.8425	0.0747	0.8524	47.7628	0.432	0.0249	0.4377	47.7628	0.4053	0.0292	0.4038	47.7628	0.8384	0.0427	0.8354	47.7628	0.432	0.4867	0.8808	47.7628	0.83	0.03	0.8283
694	0.8825	0.0545	792.5	117.5	0.1095	0.0345	201.5	126.5	1.334	0.207	1428	181		46.967	48.247		48.357	0.8623	0.083	0.8538	48.247	0.4309	0.0279	0.4384	48.247	0.4092	0.016	0.4044	48.247	0.8505	0.0487	0.8365	48.247	0.4309	0.4941	0.8822	48.247	0.8501	0.0614	0.8305
701	0.882	0.055	795.5	130.5	0.1095	0.0345	208.5	132.5	1.3345	0.2085	1434	185		47.4512	48.7312		48.8412	0.8513	0.0844	0.8552	48.7312	0.4409	0.0163	0.4391	48.7312	0.4018	0.0267	0.405	48.7312	0.8454	0.0237	0.8376	48.7312	0.4409	0.493	0.8837	48.7312	0.8503	0.0492	0.8327
708	0.8825	0.0545	795.5	130.5	0.1095	0.0345	209	127	1.334	0.207	1442	194		47.9354	49.2154		49.3254	0.8539	0.0797	0.8566	49.2154	0.4268	0.0229	0.4398	49.2154	0.4054	0.0285	0.4057	49.2154	0.8328	0.036	0.8387	49.2154	0.4268	0.5189	0.8851	49.2154	0.8077	0.0397	0.8348
715	0.8825	0.0545	789	121	0.1095	0.0345	206.5	128.5	1.335	0.208	1432	196		48.4196	49.6996		49.8096	0.8596	0.0667	0.858	49.6996	0.4433	0.0272	0.4405	49.6996	0.4068	0.0282	0.4063	49.6996	0.8377	0.0356	0.8397	49.6996	0.4433	0.4663	0.8865	49.6996	0.8299	0.029	0.837
722	0.8835	0.0545	794	127	0.1095	0.0345	214	129	1.335	0.208	1439	198		48.9038	50.1838		50.2938	0.8555	0.0785	0.8593	50.1838	0.4437	0.0223	0.4412	50.1838	0.4101	0.0286	0.4069	50.1838	0.8415	0.0468	0.8408	50.1838	0.4437	0.5087	0.8879	50.1838	0.8412	0.03	0.8391
729	0.8835	0.0545	802	125	0.1095	0.0345	217.5	135.5	1.335	0.208	1436.5	198.5		49.388	50.668		50.778	0.8691	0.0924	0.8607	50.668	0.436	0.0262	0.4419	50.668	0.4066	0.0216	0.4075	50.668	0.8527	0.0497	0.8418	50.668	0.436	0.543	0.8893	50.668	0.8207	0.0264	0.8412
736	0.8835	0.0545	799	128	0.1095	0.0345	215	131	1.3355	0.2085	1445	198		49.8722	51.1522		51.2622	0.8491	0.0723	0.862	51.1522	0.4415	0.0206	0.4425	51.1522	0.4093	0.0266	0.4081	51.1522	0.8288	0.0441	0.8428	51.1522	0.4415	0.4962	0.8906	51.1522	0.8293	0.0388	0.8433
743	0.884	0.054	784	120	0.109	0.035	208.5	125.5	1.3355	0.2085	1452.5	204.5		50.3564	51.6364		51.7464	0.8546	0.0771	0.8633	51.6364	0.4378	0.0221	0.4432	51.6364	0.404	0.028	0.4087	51.6364	0.8496	0.03	0.8438	51.6364	0.4378	0.5087	0.8919	51.6364	0.8433	0.0424	0.8453
750	0.884	0.055	803	131	0.1095	0.0345	219.5	135.5	1.3355	0.2085	1442	189		50.8406	52.1206		52.2306	0.8645	0.0888	0.8646	52.1206	0.4438	0.0236	0.4439	52.1206	0.4084	0.0225	0.4093	52.1206	0.8432	0.0374	0.8447	52.1206	0.4438	0.5193	0.8932	52.1206	0.8475	0.0409	0.8474
757	0.8845	0.0545	793	127	0.1095	0.0345	215.5	129.5	1.335	0.209	1464.5	213.5		51.3248	52.6048		52.7148	0.8625	0.0842	0.8658	52.6048	0.4434	0.013	0.4445	52.6048	0.4056	0.0183	0.4099	52.6048	0.8531	0.062	0.8457	52.6048	0.4434	0.495	0.8944	52.6048	0.837	0.0267	0.8494
764	0.8845	0.0545	790.5	122.5	0.1095	0.0345	212	125	1.336	0.209	1464	218		51.809	53.089		53.199	0.8709	0.0821	0.8671	53.089	0.4469	0.011	0.4452	53.089	0.408	0.0226	0.4105	53.089	0.858	0.0382	0.8466	53.089	0.4469	0.508	0.8956	53.089	0.845	0.0233	0.8514
771	0.884	0.054	797.5	126.5	0.1095	0.0345	215	131	1.3355	0.2095	1462.5	219.5		52.2932	53.5732		53.6832	0.8734	0.0853	0.8683	53.5732	0.4348	0.0262	0.4458	53.5732	0.4146	0.0253	0.4111	53.5732	0.8582	0.0298	0.8476	53.5732	0.4348	0.4887	0.8969	53.5732	0.8511	0.0479	0.8533
778	0.885	0.055	791.5	123.5	0.1095	0.0345	213.5	123.5	1.3365	0.2095	1461	212		52.7774	54.0574		54.1674	0.8719	0.0805	0.8695	54.0574	0.4479	0.0295	0.4464	54.0574	0.4051	0.0388	0.4117	54.0574	0.8543	0.0319	0.8485	54.0574	0.4479	0.4867	0.898	54.0574	0.8411	0.0384	0.8553
785	0.8855	0.0545	795.5	125.5	0.11	0.035	215.5	128.5	1.336	0.21	1468	220		53.2616	54.5416		54.6516	0.8791	0.0844	0.8707	54.5416	0.4554	0.02	0.4471	54.5416	0.4105	0.0192	0.4122	54.5416	0.8516	0.0523	0.8494	54.5416	0.4554	0.5089	0.8992	54.5416	0.8395	0.0306	0.8572
792	0.8855	0.0545	790	124	0.1095	0.0345	216.5	125.5	1.336	0.21	1468	223		53.7458	55.0258		55.1358	0.855	0.0814	0.8719	55.0258	0.4405	0.0192	0.4477	55.0258	0.41	0.0298	0.4128	55.0258	0.8572	0.0312	0.8503	55.0258	0.4405	0.5112	0.9003	55.0258	0.8455	0.0247	0.8591
799	0.886	0.055	790	125	0.1095	0.0345	218.5	130.5	1.336	0.21	1466	229		54.23	55.51		55.62	0.8724	0.0933	0.8731	55.51	0.4467	0.0178	0.4483	55.51	0.4164	0.0268	0.4133	55.51	0.8462	0.0413	0.8511	55.51	0.4467	0.4844	0.9015	55.51	0.8545	0.0338	0.861
806	0.886	0.054	787.5	127.5	0.1095	0.0345	226.5	135.5	1.336	0.21	1471.5	224.5		54.7142	55.9942		56.1042	0.8588	0.0744	0.8742	55.9942	0.4511	0.0241	0.4489	55.9942	0.4126	0.0214	0.4139	55.9942	0.8466	0.0594	0.852	55.9942	0.4511	0.5449	0.9026	55.9942	0.8616	0.0361	0.8629
813	0.8865	0.0545	788	123	0.11	0.035	219	125	1.336	0.21	1485.5	237.5		55.1983	56.4783		56.5883	0.8726	0.1005	0.8754	56.4783	0.4493	0.0196	0.4495	56.4783	0.4145	0.0232	0.4144	56.4783	0.8715	0.0397	0.8528	56.4783	0.4493	0.5507	0.9037	56.4783	0.8747	0.0419	0.8647
820	0.886	0.055	790.5	127.5	0.1105	0.0345	222	130	1.3365	0.2105	1474.5	236.5		55.6825	56.9625		57.0725	0.8695	0.0897	0.8765	56.9625	0.4475	0.0258	0.4501	56.9625	0.4177	0.0248	0.415	56.9625	0.8473	0.0496	0.8537	56.9625	0.4475	0.5401	0.9047	56.9625	0.8572	0.0456	0.8665
827	0.8865	0.0545	786	119	0.1105	0.0345	215	122	1.3365	0.2105	1480	228		56.1667	57.4467		57.5567	0.8789	0.0958	0.8776	57.4467	0.4579	0.0293	0.4507	57.4467	0.4165	0.0239	0.4155	57.4467	0.8663	0.0607	0.8545	57.4467	0.4579	0.5275	0.9058	57.4467	0.8741	0.0334	0.8684
834	0.8875	0.0545	792	129	0.11	0.035	225	129	1.337	0.211	1479	237		56.6509	57.9309		58.0409	0.8705	0.0784	0.8787	57.9309	0.441	0.015	0.4513	57.9309	0.416	0.0243	0.416	57.9309	0.8439	0.0486	0.8553	57.9309	0.441	0.5562	0.9068	57.9309	0.8695	0.0361	0.8701
841	0.887	0.054	786.5	120.5	0.11	0.035	218	124	1.337	0.211	1490	246		57.1351	58.4151		58.5251	0.8802	0.0954	0.8797	58.4151	0.4415	0.0266	0.4519	58.4151	0.4162	0.0169	0.4166	58.4151	0.8567	0.0333	0.8561	58.4151	0.4415	0.529	0.9078	58.4151	0.8692	0.034	0.8719
848	0.887	0.054	796.5	128.5	0.11	0.035	228	131	1.337	0.211	1487	241		57.6193	58.8993		59.0093	0.8766	0.0742	0.8808	58.8993	0.4543	0.0269	0.4525	58.8993	0.4231	0.029	0.4171	58.8993	0.8565	0.0152	0.8569	58.8993	0.4543	0.5277	0.9088	58.8993	0.877	0.037	0.8737
855	0.8875	0.0545	793	126	0.11	0.035	222	128	1.337	0.211	1500.5	250.5		58.1035	59.3835		59.4935	0.8782	0.0792	0.8819	59.3835	0.4696	0.0222	0.453	59.3835	0.4175	0.0185	0.4176	59.3835	0.8635	0.0504	0.8576	59.3835	0.4696	0.5097	0.9097	59.3835	0.8892	0.0248	0.8754
862	0.8875	0.0545	789	124	0.11	0.035	223	128	1.337	0.211	1501.5	257.5		58.5877	59.8677		59.9777	0.8907	0.0733	0.8829	59.8677	0.4427	0.0164	0.4536	59.8677	0.4221	0.0207	0.4181	59.8677	0.8581	0.0332	0.8584	59.8677	0.4427	0.5175	0.9107	59.8677	0.8864	0.0477	0.8771
869	0.888	0.054	793.5	129.5	0.1105	0.0345	228.5	129.5	1.3365	0.2115	1501.5	253.5		59.0719	60.3519		60.4619	0.885	0.091	0.8839	60.3519	0.4481	0.0239	0.4541	60.3519	0.4233	0.0178	0.4186	60.3519	0.879	0.0394	0.8591	60.3519	0.4481	0.5258	0.9116	60.3519	0.8955	0.0302	0.8789
876	0.888	0.054	786	122	0.11	0.035	222.5	122.5	1.337	0.212	1504	255		59.5561	60.8361		60.9461	0.8856	0.0952	0.8849	60.8361	0.4618	0.0149	0.4547	60.8361	0.4207	0.02	0.4191	60.8361	0.8551	0.0336	0.8598	60.8361	0.4618	0.5203	0.9125	60.8361	0.8721	0.0467	0.8805
883	0.888	0.054	794	133	0.11	0.035	227	127	1.337	0.212	1501.5	254.5		60.0403	61.3203		61.4303	0.8855	0.0875	0.8859	61.3203	0.4473	0.0275	0.4552	61.3203	0.4213	0.0265	0.4196	61.3203	0.8821	0.0362	0.8606	61.3203	0.4473	0.4901	0.9134	61.3203	0.897	0.0345	0.8822
890	0.8885	0.0545	792	126	0.1095	0.0355	226	126	1.3365	0.2125	1519.5	274.5		60.5245	61.8045		61.9145	0.8795	0.0975	0.8869	61.8045	0.4523	0.0248	0.4558	61.8045	0.43	0.0247	0.4201	61.8045	0.8432	0.0476	0.8613	61.8045	0.4523	0.5177	0.9143	61.8045	0.9074	0.0511	0.8839
897	0.8885	0.0545	788	117	0.1095	0.0355	222.5	120.5	1.3365	0.2125	1515	271		61.0087	62.2887		62.3987	0.8905	0.0757	0.8879	62.2887	0.4624	0.0205	0.4563	62.2887	0.4192	0.0304	0.4206	62.2887	0.8695	0.037	0.862	62.2887	0.4624	0.4884	0.9152	62.2887	0.8884	0.0527	0.8855
904	0.8885	0.0545	792	126	0.1095	0.0355	225.5	121.5	1.337	0.213	1511	267		61.4929	62.7729		62.8829	0.8729	0.0662	0.8888	62.7729	0.4555	0.0323	0.4569	62.7729	0.4161	0.014	0.421	62.7729	0.8677	0.0464	0.8626	62.7729	0.4555	0.4883	0.916	62.7729	0.8929	0.0362	0.8871
911	0.889	0.054	787	130	0.1095	0.0355	226.5	123.5	1.337	0.213	1529	278		61.9771	63.2571		63.3671	0.9003	0.1079	0.8898	63.2571	0.4572	0.0247	0.4574	63.2571	0.4154	0.0219	0.4215	63.2571	0.8508	0.0439	0.8633	63.2571	0.4572	0.4987	0.9168	63.2571	0.89	0.0391	0.8887
918	0.889	0.054	790	125	0.1095	0.0355	227	125	1.337	0.213	1519	272		62.4613	63.7413		63.8513	0.8829	0.0828	0.8907	63.7413	0.453	0.0244	0.4579	63.7413	0.4191	0.0195	0.422	63.7413	0.8686	0.0425	0.864	63.7413	0.453	0.4807	0.9177	63.7413	0.9004	0.0335	0.8903
925	0.889	0.054	785.5	122.5	0.1095	0.0355	229	126	1.337	0.213	1533.5	286.5		62.9455	64.2255		64.3355	0.8888	0.0711	0.8916	64.2255	0.4578	0.024	0.4584	64.2255	0.4207	0.0198	0.4225	64.2255	0.8585	0.0347	0.8646	64.2255	0.4578	0.5	0.9185	64.2255	0.8832	0.0398	0.8919
932	0.8895	0.0545	792	129	0.1095	0.0355	234	131	1.3365	0.2135	1526	281		63.4297	64.7097		64.8197	0.8823	0.0975	0.8925	64.7097	0.4582	0.0236	0.4589	64.7097	0.4192	0.0177	0.4229	64.7097	0.872	0.0601	0.8653	64.7097	0.4582	0.4828	0.9193	64.7097	0.8964	0.0258	0.8935
939	0.8895	0.0545	788	127	0.1095	0.0355	234	129	1.3375	0.2135	1537.5	294.5		63.9139	65.1939		65.3039	0.8855	0.0904	0.8934	65.1939	0.4622	0.0194	0.4594	65.1939	0.4151	0.0241	0.4234	65.1939	0.8823	0.0501	0.8659	65.1939	0.4622	0.5266	0.92	65.1939	0.909	0.0221	0.895
946	0.89	0.054	785	118	0.11	0.035	236	127	1.337	0.214	1533.5	288.5		64.3981	65.6781		65.7881	0.8836	0.0859	0.8943	65.6781	0.4616	0.0289	0.4599	65.6781	0.4323	0.0161	0.4238	65.6781	0.8828	0.0292	0.8665	65.6781	0.4616	0.5269	0.9208	65.6781	0.9145	0.0285	0.8965
953	0.89	0.054	787	121	0.1105	0.0355	232.5	125.5	1.337	0.214	1546.5	296.5		64.8823	66.1623		66.2723	0.8673	0.088	0.8952	66.1623	0.4498	0.0262	0.4604	66.1623	0.4236	0.0381	0.4243	66.1623	0.8606	0.0369	0.8671	66.1623	0.4498	0.5158	0.9215	66.1623	0.8869	0.0215	0.8981
960	0.8905	0.0545	784	120	0.1095	0.0355	225.5	115.5	1.3365	0.2135	1552	300		65.3665	66.6465		66.7565	0.8836	0.0923	0.896	66.6465	0.4565	0.0196	0.4609	66.6465	0.4215	0.0229	0.4247	66.6465	0.8514	0.0366	0.8677	66.6465	0.4565	0.4906	0.9223	66.6465	0.9183	0.0407	0.8996
967	0.891	0.054	790	127	0.1105	0.0355	234	127	1.3375	0.2145	1547.5	298.5		65.8507	67.1307		67.2407	0.8931	0.0669	0.8969	67.1307	0.4677	0.0336	0.4614	67.1307	0.4291	0.0204	0.4251	67.1307	0.8601	0.0508	0.8683	67.1307	0.4677	0.4828	0.923	67.1307	0.8919	0.0291	0.9011
974	0.8905	0.0545	786	123	0.1105	0.0355	231.5	121.5	1.337	0.214	1557.5	303.5		66.3349	67.6149		67.7249	0.8921	0.086	0.8977	67.6149	0.4507	0.0239	0.4619	67.6149	0.4276	0.0229	0.4256	67.6149	0.8452	0.0388	0.8689	67.6149	0.4507	0.5273	0.9237	67.6149	0.9044	0.0156	0.9025
981	0.8905	0.0545	790.5	122.5	0.1095	0.0355	237	125	1.337	0.214	1559.5	303.5		66.8191	68.0991		68.2091	0.8888	0.0756	0.8985	68.0991	0.4647	0.0212	0.4624	68.0991	0.4232	0.0256	0.426	68.0991	0.858	0.0504	0.8695	68.0991	0.4647	0.5125	0.9244	68.0991	0.8745	0.0272	0.904
988	0.891	0.054	785	121	0.1095	0.0355	228	115	1.3375	0.2145	1571	314		67.3032	68.5832		68.6932	0.902	0.1002	0.8994	68.5832	0.471	0.0251	0.4628	68.5832	0.4196	0.0241	0.4264	68.5832	0.8591	0.0531	0.8701	68.5832	0.471	0.5136	0.9251	68.5832	0.899	0.0347	0.9054
995	0.891	0.055	791.5	125.5	0.1105	0.0355	231.5	118.5	1.3375	0.2145	1570.5	316.5		67.7874	69.0674		69.1774	0.9173	0.0965	0.9002	69.0674	0.4673	0.0139	0.4633	69.0674	0.4289	0.0158	0.4268	69.0674	0.8644	0.0351	0.8706	69.0674	0.4673	0.4938	0.9257	69.0674	0.9351	0.0216	0.9069
1002	0.8915	0.0545	790.5	127.5	0.1105	0.0355	232	120	1.337	0.215	1572	320		68.2716	69.5516		69.6616	0.9118	0.1075	0.901	69.5516	0.47	0.0123	0.4638	69.5516	0.4267	0.0291	0.4273	69.5516	0.8598	0.0341	0.8712	69.5516	0.47	0.5044	0.9264	69.5516	0.9122	0.0222	0.9083
1009	0.8915	0.0545	789.5	126.5	0.11	0.036	236	125	1.3365	0.2145	1575	328		68.7558	70.0358		70.1458	0.9195	0.0911	0.9017	70.0358	0.4589	0.0247	0.4642	70.0358	0.4326	0.0188	0.4277	70.0358	0.874	0.0239	0.8717	70.0358	0.4589	0.5126	0.927	70.0358	0.9029	0.0208	0.9097
1016	0.8915	0.0545	793	130	0.11	0.036	241	127	1.337	0.215	1570.5	322.5		69.24	70.52		70.63	0.9158	0.098	0.9025	70.52	0.4609	0.0228	0.4647	70.52	0.4277	0.0242	0.4281	70.52	0.8736	0.0408	0.8722	70.52	0.4609	0.5325	0.9276	70.52	0.8918	0.0317	0.9111
1023	0.8915	0.0545	787.5	128.5	0.1095	0.0365	234	121	1.337	0.216	1579	331		69.7242	71.0042		71.1142	0.9168	0.1091	0.9033	71.0042	0.4561	0.0215	0.4651	71.0042	0.4239	0.0228	0.4285	71.0042	0.8826	0.0575	0.8728	71.0042	0.4561	0.5119	0.9283	71.0042	0.9033	0.0124	0.9125
1030	0.892	0.054	783	122	0.1095	0.0365	235	119	1.3365	0.2155	1595	339		70.2084	71.4884		71.5984	0.9244	0.0835	0.904	71.4884	0.456	0.0121	0.4656	71.4884	0.424	0.0189	0.4289	71.4884	0.8732	0.0509	0.8733	71.4884	0.456	0.5056	0.9289	71.4884	0.9048	0.0405	0.9138
1037	0.8915	0.0545	785.5	124.5	0.1095	0.0365	235.5	117.5	1.336	0.216	1585.5	337.5		70.6926	71.9726		72.0826	0.923	0.1018	0.9048	71.9726	0.4628	0.0181	0.466	71.9726	0.4343	0.0167	0.4293	71.9726	0.8764	0.0392	0.8738	71.9726	0.4628	0.5262	0.9295	71.9726	0.9082	0.037	0.9152
1044	0.892	0.054	783.5	123.5	0.1105	0.0355	237	121	1.3365	0.2155	1594.5	347.5		71.1768	72.4568		72.5668	0.916	0.0892	0.9055	72.4568	0.4687	0.0249	0.4664	72.4568	0.4244	0.0236	0.4297	72.4568	0.8714	0.0553	0.8743	72.4568	0.4687	0.5005	0.93	72.4568	0.9104	0.0303	0.9165
1051	0.892	0.054	785	128	0.11	0.036	233.5	118.5	1.3365	0.2155	1607	349		71.661	72.941		73.051	0.9154	0.1271	0.9062	72.941	0.4713	0.0239	0.4669	72.941	0.4273	0.0279	0.4301	72.941	0.8816	0.0634	0.8748	72.941	0.4713	0.5154	0.9306	72.941	0.9081	0.024	0.9178
1058	0.892	0.054	784.5	122.5	0.11	0.036	236.5	117.5	1.337	0.216	1607	354		72.1452	73.4252		73.5352	0.9043	0.0987	0.9069	73.4252	0.4711	0.0293	0.4673	73.4252	0.4349	0.0253	0.4304	73.4252	0.8822	0.0716	0.8753	73.4252	0.4711	0.5135	0.9312	73.4252	0.936	0.0391	0.9192
1065	0.8925	0.0545	778	126	0.1105	0.0355	233.5	117.5	1.337	0.216	1610	359		72.6294	73.9094		74.0194	0.9069	0.1048	0.9076	73.9094	0.4726	0.0239	0.4677	73.9094	0.4345	0.0203	0.4308	73.9094	0.8806	0.0425	0.8757	73.9094	0.4726	0.4938	0.9317	73.9094	0.9383	0.032	0.9205
1072	0.893	0.054	790.5	131.5	0.1105	0.0355	246.5	127.5	1.337	0.216	1609.5	358.5		73.1136	74.3936		74.5036	0.9126	0.0925	0.9083	74.3936	0.4667	0.0205	0.4681	74.3936	0.4327	0.0151	0.4312	74.3936	0.8642	0.05	0.8762	74.3936	0.4667	0.5044	0.9323	74.3936	0.9177	0.0323	0.9217
1079	0.893	0.054	786.5	127.5	0.1105	0.0355	234.5	115.5	1.3375	0.2165	1622	362		73.5978	74.8778		74.9878	0.9045	0.0974	0.909	74.8778	0.4714	0.0221	0.4685	74.8778	0.436	0.0308	0.4316	74.8778	0.8883	0.0639	0.8767	74.8778	0.4714	0.5425	0.9328	74.8778	0.923	0.0383	0.923
1086	0.893	0.054	779.5	121.5	0.11	0.036	233.5	114.5	1.337	0.216	1626.5	366.5		74.082	75.362		75.472	0.917	0.082	0.9097	75.362	0.4665	0.0168	0.469	75.362	0.4316	0.0215	0.4319	75.362	0.873	0.0535	0.8771	75.362	0.4665	0.5456	0.9333	75.362	0.9264	0.0143	0.9243
1093	0.893	0.054	785	129	0.11	0.036	241.5	119.5	1.337	0.217	1624.5	377.5		74.5662	75.8462		75.9562	0.9046	0.0931	0.9104	75.8462	0.4727	0.0217	0.4694	75.8462	0.4261	0.0258	0.4323	75.8462	0.8688	0.0517	0.8776	75.8462	0.4727	0.5257	0.9338	75.8462	0.9261	0.0136	0.9255
1100	0.893	0.054	786	124	0.1105	0.0355	240	118	1.337	0.217	1626.5	375.5		75.0504	76.3304		76.4404	0.9125	0.0872	0.911	76.3304	0.463	0.0174	0.4698	76.3304	0.4307	0.0224	0.4327	76.3304	0.8846	0.0482	0.878	76.3304	0.463	0.5312	0.9344	76.3304	0.9297	0.0339	0.9268
1107	0.8935	0.0535	789	130	0.1105	0.0355	242	118	1.337	0.217	1637	388		75.5346	76.8146		76.9246	0.9016	0.0905	0.9117	76.8146	0.464	0.0204	0.4702	76.8146	0.4428	0.0172	0.433	76.8146	0.8719	0.0564	0.8784	76.8146	0.464	0.5806	0.9348	76.8146	0.9238	0.0254	0.928
1114	0.8935	0.0545	780.5	126.5	0.1095	0.0365	245	120	1.336	0.217	1629.5	384.5		76.0188	77.2988		77.4088	0.9111	0.0907	0.9123	77.2988	0.4879	0.0219	0.4706	77.2988	0.4295	0.0209	0.4334	77.2988	0.9067	0.074	0.8789	77.2988	0.4879	0.5209	0.9353	77.2988	0.9186	0.0442	0.9292
1121	0.894	0.054	784.5	128.5	0.1105	0.0355	239.5	114.5	1.3365	0.2175	1633.5	382.5		76.503	77.783		77.893	0.9223	0.0999	0.913	77.783	0.466	0.0265	0.4709	77.783	0.4401	0.0209	0.4337	77.783	0.8826	0.0624	0.8793	77.783	0.466	0.5146	0.9358	77.783	0.9397	0.0157	0.9304
1128	0.894	0.054	781.5	123.5	0.1095	0.0365	239	115	1.336	0.218	1650	396		76.9872	78.2672		78.3772	0.9153	0.0904	0.9136	78.2672	0.4728	0.0205	0.4713	78.2672	0.4325	0.0219	0.4341	78.2672	0.8683	0.0617	0.8797	78.2672	0.4728	0.5613	0.9363	78.2672	0.9482	0.0222	0.9316
1135	0.894	0.054	780	124	0.1095	0.0365	239.5	117.5	1.3365	0.2185	1642	396		77.4714	78.7514		78.8614	0.9123	0.089	0.9142	78.7514	0.4709	0.024	0.4717	78.7514	0.4432	0.024	0.4344	78.7514	0.8857	0.0659	0.8801	78.7514	0.4709	0.4882	0.9367	78.7514	0.9287	0.0431	0.9328
1142	0.894	0.054	786.5	127.5	0.11	0.036	246.5	118.5	1.3365	0.2185	1652	407		77.9556	79.2356		79.3456	0.9069	0.0876	0.9148	79.2356	0.4788	0.0207	0.4721	79.2356	0.443	0.0105	0.4348	79.2356	0.892	0.0684	0.8805	79.2356	0.4788	0.5516	0.9372	79.2356	0.9305	0.0435	0.934
1149	0.894	0.054	788	131	0.1095	0.0365	249	122	1.3365	0.2185	1656	408		78.4398	79.7198		79.8298	0.915	0.1073	0.9154	79.7198	0.4755	0.014	0.4725	79.7198	0.4421	0.0183	0.4351	79.7198	0.8748	0.061	0.8809	79.7198	0.4755	0.4867	0.9376	79.7198	0.9403	0.0195	0.9352
1156	0.894	0.054	786	129	0.11	0.036	250	121	1.3365	0.2185	1654.5	405.5		78.924	80.204		80.314	0.9267	0.1033	0.916	80.204	0.4787	0.0238	0.4728	80.204	0.4376	0.016	0.4354	80.204	0.8735	0.0651	0.8813	80.204	0.4787	0.5073	0.9381	80.204	0.9518	0.0273	0.9363
1163	0.894	0.054	784.5	131.5	0.1095	0.0365	244.5	113.5	1.336	0.219	1669.5	416.5		79.4081	80.6881		80.7981	0.9295	0.0953	0.9166	80.6881	0.4787	0.0203	0.4732	80.6881	0.4275	0.022	0.4358	80.6881	0.8796	0.079	0.8817	80.6881	0.4787	0.5401	0.9385	80.6881	0.9491	0.0367	0.9374
1170	0.894	0.054	782	128	0.11	0.037	247	117	1.336	0.219	1674.5	428.5		79.8923	81.1723		81.2823	0.9208	0.1067	0.9172	81.1723	0.4745	0.0304	0.4736	81.1723	0.4355	0.0343	0.4361	81.1723	0.8818	0.045	0.882	81.1723	0.4745	0.5445	0.9389	81.1723	0.9342	0.031	0.9386
1177	0.8945	0.0535	780.5	128.5	0.1105	0.0365	255.5	121.5	1.336	0.219	1676.5	431.5		80.3765	81.6565		81.7665	0.9211	0.0835	0.9177	81.6565	0.4759	0.0275	0.4739	81.6565	0.4359	0.0376	0.4364	81.6565	0.883	0.0675	0.8824	81.6565	0.4759	0.5137	0.9393	81.6565	0.9532	0.0355	0.9397
1184	0.895	0.054	783.5	131.5	0.11	0.037	247.5	118.5	1.336	0.219	1682	436		80.8607	82.1407		82.2507	0.9402	0.0887	0.9183	82.1407	0.4817	0.0219	0.4743	82.1407	0.4355	0.0243	0.4367	82.1407	0.9	0.0547	0.8828	82.1407	0.4817	0.4804	0.9397	82.1407	0.9264	0.0424	0.9408
1191	0.8945	0.0535	783	131	0.1105	0.0365	249	116	1.336	0.219	1689	433		81.3449	82.6249		82.7349	0.9119	0.0941	0.9189	82.6249	0.4869	0.0266	0.4746	82.6249	0.4378	0.026	0.4371	82.6249	0.8811	0.0607	0.8831	82.6249	0.4869	0.5268	0.9401	82.6249	0.9333	0.0614	0.9419
1198	0.895	0.054	788	136	0.1105	0.0365	247.5	114.5	1.335	0.219	1686	433		81.8291	83.1091		83.2191	0.9335	0.0983	0.9194	83.1091	0.4695	0.0151	0.475	83.1091	0.4325	0.0245	0.4374	83.1091	0.8743	0.0884	0.8835	83.1091	0.4695	0.5388	0.9405	83.1091	0.9345	0.0354	0.943
1205	0.895	0.054	776	124	0.1105	0.0365	244.5	111.5	1.335	0.219	1696	441		82.3133	83.5933		83.7033	0.9104	0.0855	0.9199	83.5933	0.4792	0.0358	0.4753	83.5933	0.4339	0.0323	0.4377	83.5933	0.8605	0.0503	0.8838	83.5933	0.4792	0.5195	0.9409	83.5933	0.9434	0.043	0.9441
1212	0.895	0.054	774.5	124.5	0.11	0.037	247	115	1.3355	0.2195	1697.5	441.5		82.7975	84.0775		84.1875	0.9234	0.0935	0.9205	84.0775	0.4745	0.0222	0.4757	84.0775	0.4312	0.0224	0.438	84.0775	0.8854	0.0334	0.8842	84.0775	0.4745	0.5072	0.9413	84.0775	0.9076	0.037	0.9451
1219	0.895	0.054	782	127	0.11	0.037	246	112	1.335	0.219	1707.5	455.5		83.2817	84.5617		84.6717	0.9172	0.1015	0.921	84.5617	0.4769	0.0287	0.476	84.5617	0.4379	0.0262	0.4383	84.5617	0.8765	0.0666	0.8845	84.5617	0.4769	0.48	0.9416	84.5617	0.9314	0.0282	0.9462
1226	0.8945	0.0535	780.5	128.5	0.1105	0.0365	243.5	112.5	1.335	0.219	1705.5	448.5		83.7659	85.0459		85.1559	0.9249	0.0877	0.9215	85.0459	0.4804	0.0218	0.4764	85.0459	0.4354	0.0235	0.4386	85.0459	0.8816	0.0698	0.8848	85.0459	0.4804	0.5503	0.942	85.0459	0.9502	0.0393	0.9472
1233	0.895	0.054	783.5	128.5	0.1105	0.0365	255.5	118.5	1.3355	0.2195	1719.5	474.5		84.2501	85.5301		85.6401	0.934	0.0853	0.922	85.5301	0.4738	0.0275	0.4767	85.5301	0.4421	0.0204	0.4389	85.5301	0.8853	0.06	0.8851	85.5301	0.4738	0.5605	0.9423	85.5301	0.9547	0.0439	0.9483
1240	0.895	0.053	785.5	134.5	0.1105	0.0365	259.5	121.5	1.335	0.219	1715.5	463.5		84.7343	86.0143		86.1243	0.9226	0.0841	0.9225	86.0143	0.4661	0.0173	0.477	86.0143	0.4407	0.0138	0.4392	86.0143	0.8794	0.0213	0.8855	86.0143	0.4661	0.5226	0.9427	86.0143	0.9654	0.0433	0.9493
1247	0.895	0.053	786	133	0.1105	0.0365	255.5	117.5	1.3355	0.2205	1721.5	469.5		85.2185	86.4985		86.6085	0.931	0.0765	0.923	86.4985	0.4883	0.0194	0.4773	86.4985	0.4338	0.0185	0.4395	86.4985	0.8789	0.0514	0.8858	86.4985	0.4883	0.5202	0.943	86.4985	0.9209	0.0452	0.9503
1254	0.895	0.054	786	127	0.1105	0.0365	253	114	1.3355	0.2205	1731.5	480.5		85.7027	86.9827		87.0927	0.919	0.0943	0.9235	86.9827	0.4799	0.027	0.4777	86.9827	0.4477	0.0197	0.4398	86.9827	0.8818	0.0594	0.8861	86.9827	0.4799	0.5566	0.9434	86.9827	0.9672	0.0435	0.9513
1261	0.896	0.054	780	130	0.1105	0.0365	252	114	1.3355	0.2205	1734	487		86.1869	87.4669		87.5769	0.9272	0.087	0.924	87.4669	0.4752	0.0228	0.478	87.4669	0.4396	0.0249	0.4401	87.4669	0.8943	0.0524	0.8864	87.4669	0.4752	0.5364	0.9437	87.4669	0.9386	0.03	0.9523
1268	0.896	0.054	782.5	127.5	0.11	0.037	251.5	114.5	1.3355	0.2205	1740.5	485.5		86.6711	87.9511		88.0611	0.9099	0.0958	0.9245	87.9511	0.4669	0.0304	0.4783	87.9511	0.4418	0.0274	0.4404	87.9511	0.8923	0.0735	0.8867	87.9511	0.4669	0.5384	0.944	87.9511	0.9844	0.0546	0.9533
1275	0.8955	0.0535	783.5	130.5	0.11	0.037	257	119	1.335	0.221	1727	483		87.1553	88.4353		88.5453	0.9007	0.0832	0.925	88.4353	0.4811	0.0238	0.4786	88.4353	0.4453	0.0281	0.4406	88.4353	0.8855	0.056	0.887	88.4353	0.4811	0.5388	0.9443	88.4353	0.9653	0.0284	0.9543
1282	0.896	0.054	785	137	0.1105	0.0365	258.5	116.5	1.3345	0.2205	1741.5	487.5		87.6395	88.9195		89.0295	0.9127	0.1168	0.9254	88.9195	0.4777	0.0229	0.4789	88.9195	0.4396	0.0271	0.4409	88.9195	0.8964	0.0587	0.8873	88.9195	0.4777	0.5232	0.9446	88.9195	0.9515	0.0263	0.9553
1289	0.896	0.054	777.5	124.5	0.1105	0.0365	250	110	1.3345	0.2205	1749	506		88.1237	89.4037		89.5137	0.9032	0.0866	0.9259	89.4037	0.4869	0.0086	0.4792	89.4037	0.4357	0.0177	0.4412	89.4037	0.8763	0.0712	0.8876	89.4037	0.4869	0.5405	0.9449	89.4037	0.9621	0.0446	0.9562
1296	0.8955	0.0535	787	133	0.1105	0.0365	254	111	1.335	0.221	1749	498		88.6079	89.8879		89.9979	0.9238	0.1068	0.9264	89.8879	0.4816	0.0293	0.4795	89.8879	0.4471	0.0319	0.4415	89.8879	0.8714	0.0736	0.8879	89.8879	0.4816	0.5429	0.9452	89.8879	0.9468	0.0377	0.9572
1303	0.8955	0.0535	783	127	0.1105	0.0365	257	116	1.3345	0.2215	1755	502
1310	0.8965	0.0535	782	136	0.1105	0.0365	261	117	1.3345	0.2215	1765.5	510.5
1317	0.8965	0.0535	779.5	127.5	0.1105	0.0365	259.5	111.5	1.334	0.221	1765	520
1324	0.896	0.053	788.5	131.5	0.1105	0.0365	259.5	114.5	1.3345	0.2215	1774	520
1331	0.896	0.053	785.5	133.5	0.1105	0.0365	257.5	114.5	1.334	0.222	1772.5	530.5
1338	0.896	0.053	782	137	0.1105	0.0365	261.5	113.5	1.334	0.222	1778.5	532.5
1345	0.896	0.053	782.5	128.5	0.11	0.037	255	112	1.334	0.222	1797.5	547.5
1352	0.896	0.053	786.5	130.5	0.1105	0.0365	259	112	1.334	0.222	1786.5	544.5
1359	0.896	0.053	784.5	130.5	0.1105	0.0365	261.5	113.5	1.334	0.222	1803	557
1366	0.896	0.053	785.5	135.5	0.111	0.037	263.5	116.5	1.3335	0.2225	1810.5	567.5
1373	0.896	0.053	789	136	0.1105	0.0365	265	114	1.3335	0.2225	1805	567
1380	0.896	0.053	783	131	0.111	0.037	262	116	1.333	0.222	1802	573
1387	0.896	0.053	787	136	0.1105	0.0365	264.5	116.5	1.3325	0.2225	1822	583
1394	0.896	0.053	782.5	133.5	0.111	0.037	260	109	1.333	0.223	1820.5	588.5
1401	0.896	0.053	787	140	0.111	0.037	262	114	1.3325	0.2225	1821	582
1408	0.8965	0.0525	791.5	136.5	0.111	0.037	266	114	1.3325	0.2225	1827.5	590.5
1415	0.897	0.053	785	133	0.111	0.037	270	117	1.3325	0.2225	1829	603
1422	0.897	0.053	783	136	0.111	0.037	266	109	1.332	0.223	1842.5	608.5
1429	0.897	0.053	791	136	0.111	0.037	271.5	120.5	1.332	0.223	1842.5	607.5
1436	0.897	0.053	785.5	134.5	0.111	0.037	263	110	1.332	0.223	1846.5	614.5
[truncated: 14 more columns]

## Sheet: figure 4
Far-UV CD signal (panel 4A - 4C)											Far-UV CD signal (panel 4D)								SVD Analysis (panel 4E - 4F)																	FTIR Signal (panel 4H-4J)
	WT + polyP			DM + polyP			P33A + polyP				Time (h)	WT MRE @ 222 nm	fit	DM MRE @ 222 nm	fit	P33A MRE @ 222 nm	fit		Wavelength (nm)	SVD Basic Spectra U1	SVD Basic Spectra U2		SVD Amplitude (V1) corresponding to U1						SVD Amplitude (V2) corresponding to U2								WT + polyP		only WT	DM + polyP		only DM	P33A + polyP		only P33A
wavelength (nm)	MRE @0h	MRE @1h	MRE @4h	MRE @0h	MRE @1h	MRE @4h	MRE @0h	MRE @1h	MRE @4h		0	-2430.4	-2486.86	-2501.34	-2804.69	-4637.83	-5005.56		250	-0.0062786	0.0538	Time (h)	WT V1	fit	DM V1	fit	P33A V1	fit	WT V2	fit	DM V2	fit	P33A V2	fit		Wavenumber (cm-1)	Normalized Absorbance @ 0 min	Normalized Absorbance @ 60 min	Normalized Absorbance	Normalized Absorbance @ 0 min	Normalized Absorbance @ 60 min	Normalized Absorbance	Normalized Absorbance @ 0 min	Normalized Absorbance @ 60 min	Normalized Absorbance
250	-650.114	80.846	106.683	-731.056	40.7306	4.4753	-673.964	-368.724	-312.605		0.25	-2345.91	-2342.26	-2282.94	-2276.66	-3825.79	-3879.22		249	-0.0075135	0.0583	0.25	0.1069	0.1096	0.1112	0.1101	0.1429	0.142	0.0351	0.0317	0.0178	0.0059802	-0.2665	-0.2693		1700	0.0272	0.038	-0.131	0.0172	0.0184	-0.1798	0.013	0.0712	-0.1074
249	-705.72	67.0976	86.2463	-760.827	34.7415	11.168	-749.582	-411.093	-357.524		0.5	-2379.36	-2333.88	-1949.85	-1945.95	-3384.28	-3220.43		248	-0.0091437	0.0627	0.5	0.0965	0.0968	0.1141	0.1129	0.1233	0.1202	0.0432	0.0525	0.0273	0.0403	-0.2534	-0.2423		1699	0.0361	0.054	-0.1081	0.025	0.0246	-0.1832	0.0307	0.0717	-0.108
248	-725.684	74.5698	51.8261	-811.439	22.7099	-12.2428	-768.055	-443.954	-385.79		0.75	-2453.93	-2443.2	-1702.78	-1733.93	-2742.79	-2837.1		247	-0.0115	0.0669	0.75	0.0878	0.0879	0.1191	0.12	0.1033	0.1066	0.0593	0.056	0.0409	0.0515	-0.2156	-0.2216		1698	0.042	0.0655	-0.1633	0.03	0.0288	-0.1811	0.0315	0.1078	-0.114
247	-790.174	69.7264	42.7854	-893.624	-3.6556	-48.6234	-835.802	-490.043	-407.929		1	-2632.28	-2651.68	-1565.22	-1593.44	-2579.73	-2616.07		246	-0.0142	0.0714	1	0.0811	0.0815	0.1288	0.1306	0.0942	0.0983	0.0601	0.0573	0.0524	0.0579	-0.2026	-0.2063		1697	0.0508	0.077	-0.2309	0.0382	0.0346	-0.1584	0.04	0.1617	-0.1007
246	-891.194	62.055	29.4619	-964.303	-34.0646	-89.7229	-885.096	-540.909	-446.452		1.25	-2843.35	-2940.8	-1522.82	-1496.16	-2461.49	-2490.69		245	-0.0175	0.0767	1.25	0.0781	0.0768	0.142	0.144	0.0934	0.0932	0.0578	0.0582	0.0671	0.0636	-0.1879	-0.1958		1696	0.0683	0.0964	-0.2286	0.0558	0.0457	-0.1156	0.0848	0.2004	-0.0508
245	-994.554	35.0469	32.2205	-1029.89	-71.9887	-166.502	-1019.21	-619.747	-484.297		1.5	-3231.32	-3292.03	-1472.71	-1425.11	-2436.75	-2421.67		244	-0.0219	0.0838	1.5	0.0746	0.073	0.1573	0.1596	0.0924	0.0901	0.0561	0.0591	0.0755	0.0695	-0.1923	-0.1894		1695	0.0921	0.1241	-0.1586	0.0795	0.061	-0.0722	0.1497	0.2122	0.0106
244	-1079.45	1.179	19.0991	-1164.62	-142.537	-257.836	-1140.19	-701.192	-605.683		1.75	-3654.9	-3686.85	-1433.18	-1370.09	-2325.99	-2385.89		243	-0.0267	0.0891	1.75	0.0716	0.07	0.1754	0.1766	0.0884	0.0884	0.0612	0.0601	0.0838	0.0759	-0.196	-0.1863		1694	0.1145	0.1509	-0.0993	0.0999	0.0762	-0.0495	0.1924	0.2186	0.043
243	-1169.9	-51.2417	1.1053	-1270.16	-228.326	-346.917	-1255.61	-797.517	-731.188		2	-4158.62	-4106.73	-1292.49	-1324.98	-2445.26	-2369.7		242	-0.0329	0.0962	2	0.0669	0.0675	0.1968	0.1943	0.0903	0.0874	0.0584	0.061	0.0892	0.0828	-0.1833	-0.1858		1693	0.1316	0.1712	-0.0811	0.1129	0.0892	-0.0341	0.2062	0.2335	0.0494
242	-1279	-97.2054	-37.2525	-1400.17	-322.178	-468.161	-1397.1	-891.426	-815.718		2.25	-4645.92	-4533.13	-1307.89	-1286.1	-2337.48	-2365.09		241	-0.0402	0.1044	2.25	0.0647	0.0652	0.2159	0.2121	0.0882	0.087	0.0644	0.062	0.0959	0.0904	-0.189	-0.1872		1692	0.146	0.1862	-0.0793	0.1232	0.1011	-0.0127	0.2166	0.2536	0.0496
241	-1446.13	-171.839	-68.8789	-1559.97	-425.121	-635.638	-1581.3	-992.345	-917.138		2.5	-5047.46	-4947.54	-1205.81	-1251.24	-2415.31	-2367.32		240	-0.0489	0.1129	2.5	0.0614	0.0632	0.233	0.2292	0.0883	0.0868	0.0643	0.0629	0.1037	0.0987	-0.1912	-0.1898		1691	0.1607	0.1977	-0.0646	0.1353	0.1135	0.0134	0.2398	0.2691	0.052
240	-1622.34	-260.699	-103.862	-1731.66	-556.757	-802.116	-1776.76	-1132.26	-1018.13		2.75	-5368.05	-5331.42	-1169.25	-1219.05	-2420.08	-2373.61		239	-0.0586	0.1204	2.75	0.0593	0.0613	0.2464	0.245	0.0891	0.0869	0.066	0.0639	0.114	0.1077	-0.1884	-0.1928		1690	0.1758	0.2075	-0.0235	0.1485	0.1271	0.0455	0.27	0.2721	0.0631
239	-1834.03	-357.56	-131.145	-1938.38	-709.341	-990.801	-1948.89	-1257.46	-1161.58		3	-5639.52	-5666.25	-1170.15	-1188.73	-2315.92	-2382.32		238	-0.0692	0.126	3	0.0588	0.0595	0.2577	0.2587	0.0861	0.0871	0.0685	0.0649	0.1241	0.1175	-0.1987	-0.1956		1689	0.1897	0.2166	0.0311	0.1606	0.141	0.0789	0.2931	0.2666	0.0855
238	-2050.06	-427.739	-200.1	-2126.88	-882.018	-1230.03	-2180.89	-1395.75	-1296.61		3.25	-5852.89	-5933.5	-1130.54	-1159.8	-2475.09	-2392.47		237	-0.0812	0.1325	3.25	0.0572	0.0579	0.2665	0.2697	0.0855	0.0874	0.0685	0.0659	0.1322	0.1283	-0.1957	-0.1973		1688	0.2013	0.2258	0.0781	0.1702	0.1537	0.107	0.3064	0.2634	0.113
237	-2230.7	-549.277	-253.382	-2370.08	-1040.32	-1533.87	-2467.62	-1568.71	-1461.38		3.5	-5993.22	-6114.64	-1118.07	-1131.95	-2411.79	-2403.5		236	-0.094	0.139	3.5	0.0563	0.0563	0.2726	0.2772	0.0889	0.0877	0.0663	0.0669	0.1401	0.14	-0.1948	-0.1974		1687	0.2122	0.2356	0.0999	0.1797	0.1645	0.1283	0.3148	0.2751	0.1328
236	-2409.37	-676.26	-303.536	-2596.29	-1215.04	-1861.35	-2757.44	-1727.77	-1624.44		3.75	-6163.77	-6191.15	-1141.9	-1104.99	-2354.47	-2415.08		235	-0.1078	0.1463	3.75	0.0555	0.0547	0.2786	0.2806	0.0882	0.0881	0.064	0.068	0.1447	0.1528	-0.1943	-0.1949		1686	0.2278	0.2488	0.1016	0.194	0.1762	0.1457	0.3229	0.3063	0.1419
235	-2607.9	-786.026	-362.734	-2821.67	-1374.59	-2206.88	-3041.27	-1889.37	-1793.72		4	-6249.05	-6144.5	-1121.9	-1078.81	-2414.92	-2427		234	-0.1217	0.1516	4	0.0555	0.0532	0.2838	0.2791	0.0853	0.0885	0.0668	0.069	0.1524	0.1668	-0.1916	-0.1894		1685	0.2522	0.2692	0.1181	0.216	0.1932	0.1798	0.3403	0.3429	0.1677
234	-2799.7	-896.002	-422.651	-2957	-1569.89	-2576.64	-3310.07	-2044.28	-2009.08										233	-0.1358	0.1565															1684	0.2814	0.2993	0.1569	0.2414	0.2158	0.2513	0.3659	0.3623	0.2385
233	-2982.58	-972.132	-489.256	-3103.38	-1754.38	-3018.15	-3598.43	-2186.76	-2140.3										232	-0.1499	0.1598															1683	0.3083	0.3313	0.1892	0.2665	0.2396	0.3249	0.3803	0.3675	0.312
232	-3155.28	-1065.1	-514.711	-3209.62	-1952.43	-3467.49	-3919.6	-2360.84	-2222.97										231	-0.1637	0.1614															1682	0.3299	0.3533	0.2039	0.2893	0.2604	0.357	0.3798	0.3783	0.334
231	-3183.53	-1145.31	-578.48	-3313.03	-2115.92	-3899.52	-4213.86	-2499.75	-2314.05										230	-0.1763	0.1575															1681	0.3474	0.3673	0.2139	0.3077	0.2783	0.3603	0.3756	0.3938	0.3291
230	-3190.02	-1266.42	-663.387	-3363.66	-2252.93	-4290.71	-4414.2	-2645.07	-2414.4										229	-0.1882	0.1538															1680	0.3651	0.3818	0.2368	0.3252	0.2955	0.3556	0.381	0.4054	0.3347
229	-3184.96	-1352.16	-729.793	-3324.55	-2379.38	-4704.64	-4606	-2769.82	-2506.17										228	-0.1983	0.1463															1679	0.3836	0.3997	0.2791	0.3427	0.3125	0.359	0.4016	0.4071	0.3648
228	-3177.86	-1456.64	-772.991	-3277.45	-2488.18	-5089.61	-4757.46	-2894.89	-2550.18										227	-0.2068	0.1399															1678	0.402	0.4185	0.3208	0.3606	0.3294	0.3757	0.4316	0.4084	0.4047
227	-3085.04	-1498.15	-824.186	-3201.73	-2552.76	-5421.53	-4873.85	-2938.95	-2608.67										226	-0.2136	0.1312															1677	0.4209	0.4361	0.3408	0.3805	0.3469	0.3937	0.4646	0.4208	0.4329
226	-2998.86	-1539.23	-897.269	-3142.99	-2581.31	-5722.82	-4914.38	-2988.85	-2652.37										225	-0.2179	0.1187															1676	0.4422	0.4548	0.3549	0.4045	0.3669	0.4051	0.4987	0.4423	0.4391
225	-2869.24	-1587.89	-958.498	-2995.88	-2588.64	-5949.95	-5039.28	-2885.74	-2622.18										224	-0.2196	0.1031															1675	0.4649	0.4774	0.3825	0.4302	0.3884	0.4138	0.5313	0.4584	0.4331
224	-2736.57	-1601.82	-1017.18	-2864.16	-2601.26	-6121.89	-4995.11	-2877.91	-2555.61										223	-0.2191	0.0871															1674	0.4866	0.5017	0.413	0.4534	0.4087	0.4258	0.5531	0.4681	0.428
223	-2583.44	-1592.4	-1058.6	-2673.48	-2619.5	-6215.46	-4941.66	-2726.4	-2543.74										222	-0.2162	0.0659															1673	0.506	0.5222	0.4248	0.4728	0.4264	0.4459	0.5595	0.4829	0.4293
222	-2501.34	-1565.22	-1121.9	-2430.4	-2632.28	-6249.05	-4637.83	-2579.73	-2414.92										221	-0.2118	0.0439															1672	0.5243	0.5386	0.4189	0.4894	0.4431	0.4766	0.56	0.5062	0.4397
221	-2269.12	-1589.44	-1143.93	-2214.12	-2579.92	-6255.15	-4379.9	-2313.86	-2229.11										220	-0.206	0.0217															1671	0.5443	0.5548	0.426	0.5066	0.4609	0.5167	0.5713	0.5276	0.4608
220	-2069.67	-1568	-1157.59	-2046.56	-2520.77	-6214.31	-4126.56	-2120.98	-2055.56										219	-0.1986	-0.0010979															1670	0.5688	0.5762	0.46	0.5266	0.4816	0.5622	0.6004	0.5372	0.4964
219	-1869.16	-1584.92	-1162.15	-1947.08	-2439.71	-6084.55	-3756.58	-1900.11	-1787										218	-0.1897	-0.0261															1669	0.5983	0.6036	0.4994	0.5515	0.5058	0.5996	0.6353	0.5432	0.5422
218	-1701.64	-1543.96	-1173.59	-1817.16	-2345.72	-5947.65	-3435.19	-1727.66	-1470.5										217	-0.1802	-0.0547															1668	0.6301	0.6327	0.5217	0.5814	0.5325	0.6183	0.6599	0.5574	0.5873
217	-1630.08	-1488.6	-1194.86	-1744.82	-2301	-5797.22	-3000.32	-1465.06	-1142.82										216	-0.1717	-0.0782															1667	0.66	0.6582	0.5388	0.6113	0.5595	0.6303	0.6676	0.574	0.6281
216	-1520.02	-1445.33	-1194.87	-1611.75	-2252.09	-5671.85	-2747	-1158.59	-1009.78										215	-0.1635	-0.1039															1666	0.6866	0.6801	0.5635	0.6376	0.586	0.6491	0.6621	0.5839	0.6668
215	-1428.41	-1397.73	-1192.22	-1476.18	-2193.26	-5533.72	-2247.2	-849.201	-793.766										214	-0.1562	-0.1272															1665	0.7135	0.7014	0.6005	0.6634	0.6136	0.6758	0.6568	0.5899	0.6999
214	-1430.11	-1337.06	-1174.15	-1346.79	-2122.21	-5411.12	-1907.09	-557.426	-671.684										213	-0.1499	-0.1528															1664	0.7446	0.7251	0.6481	0.6942	0.6448	0.7025	0.669	0.6012	0.7187
213	-1346.64	-1336.04	-1144.81	-1274.32	-2083.21	-5276.02	-1459.76	-432.659	-407.898										212	-0.1452	-0.1814															1663	0.7812	0.7549	0.7051	0.7329	0.6809	0.7286	0.7053	0.6194	0.7242
212	-1238.26	-1386.49	-1174.56	-1340.57	-2130.45	-5233.33	-972.58	-197.427	-239.78										211	-0.1424	-0.2047															1662	0.8205	0.7908	0.7585	0.777	0.7203	0.7627	0.7502	0.6417	0.7313
211	-1191.65	-1424.07	-1173.49	-1307.58	-2197.14	-5221.87	-666.479	-73.6414	-27.4964										210	-0.1422	-0.2268															1661	0.8593	0.8274	0.8002	0.8216	0.7603	0.8108	0.7838	0.666	0.7536
210	-1292.45	-1433.7	-1202.99	-1302.33	-2258.7	-5303.82	-508.163	35.4453	169.699										209	-0.1429	-0.2409															1660	0.8946	0.8594	0.829	0.862	0.7989	0.8723	0.8041	0.6889	0.7901
209	-1379.86	-1488.04	-1192.55	-1313.82	-2310.99	-5340.47	-472.306	43.5906	292.829										208	-0.1418	-0.2556															1659	0.9259	0.8866	0.8525	0.8969	0.8361	0.9345	0.823	0.7065	0.8257
208	-1407.27	-1554.99	-1207	-1442.39	-2306.9	-5283.12	-170.424	232.47	240.444										207	-0.1394	-0.2573															1658	0.9527	0.912	0.8819	0.9265	0.8714	0.9799	0.851	0.7128	0.8511
207	-1530.4	-1622.48	-1181.28	-1464.73	-2368.45	-5121.73	-121.374	193.365	204.727										206	-0.1343	-0.2497															1657	0.9734	0.9368	0.9172	0.9498	0.9029	0.9987	0.8871	0.7076	0.8718
206	-1513.38	-1741.67	-1236.22	-1453.45	-2311.4	-4818.23	-198.355	141.271	182.841										205	-0.1258	-0.2361															1656	0.9865	0.9588	0.9465	0.9664	0.9285	0.9993	0.9262	0.6995	0.9002
205	-1549.79	-1714.1	-1257.76	-1442.39	-2267.23	-4504.72	-159.789	235.478	212.726										204	-0.1157	-0.2111															1655	0.9942	0.9747	0.9653	0.9801	0.9487	0.986	0.961	0.704	0.9332
204	-1359.68	-1632.89	-1187.21	-1418.52	-2132.53	-4012.47	-37.0526	116.41	114.867										203	-0.1019	-0.1735															1654	0.9994	0.9846	0.9941	0.9926	0.9666	0.9726	0.9901	0.7183	0.9682
203	-1533.02	-1576.46	-1022.58	-1261.91	-1943.19	-3277.03	-85.9072	113.295	100.741										202	-0.0857	-0.13															1653	1	0.9933	1	0.9981	0.9823	0.982	1	0.7387	1
202	-1632.2	-1490.79	-961.29	-1190.47	-1676.9	-2421.95	-117.596	-159.171	3.3808										201	-0.064	-0.0823															1652	0.9981	1	0.9565	1	0.994	0.9953	0.9983	0.7742	0.9941
201	-1547.72	-1400.65	-839.722	-950.538	-1353.48	-1570.67	-156.776	-459.235	-205.256										200	-0.0382	-0.0266															1651	0.9946	0.9972	0.9083	0.9983	1	0.9926	0.989	0.8177	0.9441
200	-1394.08	-1066.2	-757.9	-617.616	-913.621	-434.973	-285.369	-686.949	-122.999																											1650	0.9847	0.9907	0.8625	0.9848	0.9986	1	0.9568	0.848	0.9066
																																				1649	0.9706	0.985	0.8114	0.9653	0.9905	0.9947	0.917	0.8725	0.8983
																																				1648	0.9534	0.9793	0.7814	0.9418	0.976	0.9733	0.9003	0.8872	0.9254
																																				1647	0.934	0.9732	0.7714	0.9136	0.9555	0.9492	0.9092	0.8934	0.9664
																																				1646	0.9143	0.9664	0.745	0.8834	0.9318	0.9405	0.923	0.8993	0.9814
																																				1645	0.8982	0.9585	0.6992	0.8579	0.9097	0.9392	0.9273	0.91	0.9504
																																				1644	0.8847	0.9505	0.6604	0.8371	0.8916	0.9305	0.92	0.9192	0.9
																																				1643	0.8714	0.946	0.6428	0.8182	0.8757	0.9078	0.9071	0.9216	0.8595
																																				1642	0.8575	0.9445	0.6463	0.8008	0.8601	0.873	0.8997	0.9179	0.8368
																																				1641	0.8439	0.9434	0.6675	0.7855	0.8442	0.8336	0.9005	0.9086	0.8278
																																				1640	0.8312	0.9401	0.6921	0.7709	0.8285	0.8008	0.9014	0.8959	0.8227
																																				1639	0.8182	0.9329	0.7027	0.7551	0.8128	0.7828	0.8937	0.8869	0.8073
																																				1638	0.8041	0.9218	0.6915	0.7367	0.7964	0.7787	0.8772	0.8855	0.7704
																																				1637	0.7897	0.9091	0.6663	0.7166	0.7794	0.7828	0.8553	0.89	0.7123
																																				1636	0.7752	0.9	0.6328	0.6957	0.7619	0.7841	0.8323	0.892	0.6558
																																				1635	0.7621	0.8999	0.5952	0.678	0.745	0.7787	0.8151	0.8922	0.6271
																																				1634	0.7512	0.9053	0.5799	0.6672	0.7302	0.764	0.8165	0.8945	0.623
																																				1633	0.7401	0.9094	0.587	0.6584	0.7173	0.7547	0.8283	0.8996	0.621
																																				1632	0.728	0.9098	0.5928	0.6477	0.7052	0.7453	0.8383	0.9072	0.605
																																				1631	0.7151	0.9059	0.5858	0.6348	0.6927	0.7259	0.8453	0.915	0.5723
																																				1630	0.7012	0.8994	0.5693	0.6195	0.6791	0.6972	0.8502	0.9188	0.5334
																																				1629	0.6859	0.8935	0.5517	0.6026	0.6637	0.6718	0.852	0.9179	0.5036
																																				1628	0.6696	0.891	0.5306	0.5853	0.6465	0.6564	0.8499	0.9161	0.4892
																																				1627	0.6538	0.8928	0.5012	0.5694	0.6284	0.643	0.8477	0.9186	0.4807
																																				1626	0.6396	0.8969	0.4642	0.5552	0.6104	0.6257	0.8528	0.9291	0.4644
																																				1625	0.6264	0.9015	0.4295	0.5419	0.5924	0.6029	0.869	0.9475	0.4366
																																				1624	0.6133	0.906	0.4095	0.5286	0.5741	0.5775	0.8924	0.9681	0.408
																																				1623	0.6002	0.9108	0.4078	0.5154	0.5556	0.5475	0.9141	0.9802	0.3957
																																				1622	0.5883	0.9148	0.416	0.5034	0.5381	0.516	0.9251	0.9807	0.4056
																																				1621	0.5778	0.9167	0.4207	0.4921	0.522	0.4906	0.9238	0.9783	0.4263
																																				1620	0.5671	0.9157	0.4083	0.4798	0.5066	0.4806	0.9141	0.9819	0.4448
																																				1619	0.5553	0.9123	0.3872	0.4665	0.4909	0.482	0.9044	0.9923	0.4486
																																				1618	0.5424	0.9076	0.376	0.4533	0.4746	0.4759	0.9023	1	0.4262
																																				1617	0.5282	0.9042	0.3825	0.4398	0.4577	0.4505	0.9078	0.995	0.3766
																																				1616	0.5128	0.9027	0.3778	0.4255	0.4408	0.4057	0.9102	0.9814	0.3169
																																				1615	0.4979	0.8999	0.3502	0.4117	0.426	0.3583	0.9005	0.9708	0.2718
																																				1614	0.4838	0.8918	0.3173	0.3976	0.4134	0.3282	0.8805	0.9629	0.2541
																																				1613	0.4695	0.8778	0.2932	0.383	0.4015	0.3168	0.8554	0.9524	0.2561
																																				1612	0.4539	0.8574	0.2761	0.3689	0.3887	0.3122	0.8282	0.9358	0.2629
																																				1611	0.4361	0.8311	0.265	0.3549	0.375	0.3061	0.7998	0.9082	0.269
																																				1610	0.4161	0.799	0.2632	0.3398	0.3608	0.3028	0.7702	0.868	0.2762
																																				1609	0.3953	0.7629	0.2673	0.3236	0.3464	0.3041	0.7385	0.8206	0.2813
																																				1608	0.3761	0.7264	0.2691	0.3079	0.3328	0.3082	0.7033	0.7748	0.2748
																																				1607	0.3597	0.6924	0.2656	0.2941	0.3206	0.3135	0.6686	0.7331	0.2538
																																				1606	0.3458	0.6612	0.2585	0.2823	0.3101	0.3142	0.639	0.6936	0.2271
																																				1605	0.3333	0.6317	0.2462	0.272	0.3005	0.3001	0.6108	0.6552	0.2064
																																				1604	0.3213	0.6041	0.2286	0.2629	0.2915	0.2721	0.5763	0.6186	0.1973
																																				1603	0.3092	0.5784	0.2086	0.2546	0.283	0.2406	0.5378	0.5841	0.1977
																																				1602	0.2975	0.5544	0.1998	0.2471	0.2755	0.2226	0.506	0.5509	0.2009
																																				1601	0.2867	0.5311	0.2027	0.2405	0.2688	0.2213	0.4838	0.5221	0.2005
																																				1600	0.2778	0.5094	0.2103	0.2354	0.263	0.2326	0.4631	0.5023	0.1958

## Sheet: Figure 5
OD (350nm) at different protein concentrations (panel 5A)					FRAP @ 0 min (panel 5D and 5E)																	OD (350nm) as a function of time (panel 3H)				Droplet size distribution at different time points (panel 5J)					WT FRAP t-half (panel 5K)					Far-UV CD signal (panel 5L - 5O)
Protein conc (µM)	OD (350nm)	Error	fit		WT				DM				P33A									Time(min)	WT OD 350 nm	Error		Length of major axis (µM)	Frequency of WT droplets @0 min	Frequency of WT droplets @30 min	Frequency of WT droplets @60 min			WT t-half @ 0min	WT t-half @ 30min	WT t-half @ 60min			only WT	WT + DNA			only DM	DM + DNA			only P33A	P33A + DNA			Time (h)
2	0.001	0.0014142	-0.0183		Time (sec)	Fractional Recovery	error	fit	Time (sec)	Fractional Recovery	error	fit	Time (sec)	Fractional Recovery	error	fit		WT	DM	P33A		1	1.227	0.147		0	0	0	0		t-half	6.65	8.42	15.93		wavelength (nm)	MRE	MRE @0h	MRE @1h	MRE @4h	MRE	MRE @0h	MRE @1h	MRE @4h	MRE	MRE @0h	MRE @1h	MRE @4h	0
2.6448	0.002	0.0014142	-0.0032414		0	1	0		0	1	0		0	1	0		t-half @ 0min	6.65	6.63	1.66		8	1.074	0.125		0.6	199	19	21			4.68	5.99	13.39		250	167.772	-1167.42	-34.5335	-228.439	188.758	-53.6412	-14.1567	44.1668	250.497	-647.67	22.6001	19.9901	0.25
3.4974	0.0085	0.006364	0.0163		0.3377	0.9366	0.0621		0.8845	0.9578	0.088		0.639	1.0072	0.0607			4.68	6.92	3.01		15	0.9535	0.1295		1.2	452	74	62			3.9	9.57	11.6		249	184.032	-1068.77	-57.4944	-244.296	234	-269.026	-12.1398	35.8853	205.899	-677.924	23.7985	-53.8512	0.5
4.6248	0.021	0.0113	0.0411		1.0892	0	0	0.0213	2.2969	0	0	0.0172	1.6978	0	0	0.019		3.9	6.9	3.47		22	0.8585	0.1295		1.8	403	84	75			6.63	7.63	9.84		248	132.739	-1065.43	-138.368	-280.435	152.411	-490.78	0.3468	-11.0351	200.221	-683.825	-18.2784	-82.9301	0.75
6.1158	0.03	0.0070711	0.072		1.4269	0.0893	0.0508	0.0756	3.1814	0.1017	0.0548	0.1027	2.3368	0.1832	0.0233	0.1582		6.63	5.34	2.95		29	0.7745	0.1305		2.4	239	133	113		Average thalf	5.465	7.9025	12.69		247	111.558	-1092.79	-173.169	-299.531	130.772	-679.917	-20.6574	-74.6875	151.525	-716.737	-42.5438	-87.9493	1
8.0873	0.148	0.0113	0.1092		1.7645	0.1569	0.0599	0.1248	4.0659	0.2191	0.041	0.1782	2.9757	0.3259	0.061	0.2737	Average thalf	5.465	6.4475	2.7725		36	0.722	0.133		3	100	126	127		Error	1.3937	1.5034	2.6012		246	25.6973	-1075.71	-197.276	-332.629	72.6433	-730.9	-68.6015	-132.035	98.8549	-704.552	-99.0426	-91.0725	1.25
10.695	0.148	0.0354	0.1525		2.1022	0.1869	0.0596	0.1693	4.9505	0.2527	0.0928	0.2452	3.6147	0.4079	0.058	0.3695	Error	1.3937	0.7501	0.7772		43	0.711	0.147		3.6	37	128	93							245	-6.1749	-1087.53	-196.492	-385.188	12.0394	-825.009	-147.635	-226.066	61.8623	-684.385	-147.42	-148.172	1.5
14.142	0.22	0.0778	0.2009		2.4398	0.2287	0.0485	0.2096	5.835	0.2559	0.0555	0.3049	4.2536	0.4733	0.0568	0.4493						50	0.716	0.139		4.2	17	91	53							244	-105.361	-1160.24	-272.708	-439.502	-161.473	-867.777	-262.701	-233.587	-18.263	-750.104	-188.702	-199.065	1.75
18.701	0.275	0.0636	0.2526		2.7775	0.2459	0.0634	0.2462	6.7195	0.3573	0.0544	0.3582	4.8926	0.5207	0.047	0.5158						57	0.729	0.132		4.8	19	47	37							243	-197.891	-1255.91	-401.572	-509.94	-324.587	-973.855	-360.117	-345.949	-142.347	-845.381	-288.236	-335.975	2
24.73	0.273	0.0198	0.305		3.1151	0.3143	0.0533	0.2795	7.604	0.4452	0.0737	0.406	5.5315	0.5751	0.0508	0.5715						64	0.7395	0.1215		5.4	4	27	24							242	-307.767	-1353.24	-453.825	-619.852	-499.762	-1144.02	-447.208	-500.892	-273.174	-886.577	-376.285	-471.364	2.25
32.702	0.339	0.116	0.3557		3.4528	0.3134	0.0628	0.3098	8.4885	0.4564	0.0715	0.4492	6.1705	0.5873	0.0155	0.6181						71	0.748	0.114		6	5	16	10							241	-418.856	-1501.18	-502.771	-709.235	-718.033	-1360.67	-632.552	-703.996	-387.197	-982.783	-454.788	-567.322	2.5
43.245	0.449	0.0283	0.4025		3.7904	0.375	0.0543	0.3374	9.3731	0.5198	0.0377	0.4882	6.8094	0.6385	0.0641	0.6574						78	0.7545	0.1095		6.6	0	9	8							240	-608.39	-1688.08	-626.812	-877.129	-928.576	-1576.42	-881.783	-898.823	-511.268	-1149.06	-575.768	-665.191	2.75
57.186	0.423	0.1315	0.4437		4.1281	0.3727	0.0432	0.3627	10.2576	0.5177	0.041	0.5237	7.4484	0.6799	0.0959	0.6906						85	0.766	0.103		7.2	0	5	3							239	-868.089	-1881.25	-792.705	-1051.23	-1246.32	-1876.57	-1142.37	-1183.24	-634.519	-1355.74	-760.739	-796.5	3
75.621	0.435	0.1315	0.4786		4.4657	0.3722	0.0604	0.3858	11.1421	0.5644	0.0376	0.5562	8.0873	0.7132	0.0336	0.7188						92	0.7735	0.0995		7.8	5	16	3							238	-1130.77	-2163.68	-1030.46	-1255.66	-1643.59	-2214.62	-1440.81	-1473.89	-812.02	-1553.05	-913.993	-975.355	3.25
100	0.5435	0.1068	0.5073		4.8034	0.3722	0.0762	0.407	12.0266	0.5499	0.068	0.5859	8.7263	0.7081	0.0577	0.7428						99	0.7805	0.0935												237	-1431.87	-2402.85	-1220.87	-1498.93	-2105.06	-2638.92	-1784.95	-1813.95	-1027.89	-1819.33	-1084.39	-1183.03	3.5
					5.141	0.4311	0.0507	0.4264	12.9111	0.6321	0.0572	0.6134	9.3652	0.7198	0.0495	0.7634						106	0.7875	0.0895												236	-1766.52	-2720.03	-1460.99	-1784.83	-2641.82	-3120.55	-2160.86	-2231.21	-1300.53	-2049.57	-1302.05	-1359.39	3.75
					5.4787	0.457	0.0815	0.4444	13.7957	0.5981	0.069	0.6387	10.0042	0.7826	0.0754	0.7812						113	0.795	0.084												235	-2132.59	-3102.27	-1692.92	-2076.48	-3266.51	-3675.84	-2660.06	-2761.46	-1560.75	-2288.25	-1588.17	-1656.13	4
					5.8163	0.499	0.0711	0.4609	14.6802	0.654	0.0929	0.6623	10.6431	0.7646	0.0556	0.7966						120	0.8	0.082												234	-2528.53	-3486.02	-2042.61	-2445.57	-3953.8	-4258.26	-3228.31	-3303.6	-1909.24	-2538.11	-1885.7	-1962.56
					6.154	0.5147	0.0904	0.4762	15.5647	0.6556	0.051	0.6843	11.2821	0.7478	0.0431	0.8101						127	0.807	0.077												233	-2904.23	-3783.01	-2384.43	-2882.51	-4706.84	-4827.72	-3771.37	-3941.04	-2262.46	-2828.91	-2158.78	-2273.36
					6.4916	0.4557	0.033	0.4904	16.4492	0.685	0.0188	0.7049	11.921	0.7643	0.055	0.822						134	0.812	0.073												232	-3388.3	-4024.38	-2770.01	-3317.2	-5480.16	-5438.1	-4373.69	-4579.55	-2544.32	-3195.62	-2408.23	-2526.96
					6.8293	0.5061	0.0804	0.5036	17.3337	0.7377	0.0459	0.7243	12.56	0.8138	0.0358	0.8325						141	0.816	0.072												231	-3916.06	-4278.69	-3071.43	-3784.61	-6349.15	-5973.72	-5070.33	-5261.74	-2850.22	-3516.95	-2695.18	-2942.67
					7.1669	0.527	0.0977	0.5158	18.2183	0.7374	0.0438	0.7425	13.1989	0.8441	0.0627	0.842						148	0.82	0.07												230	-4473.98	-4602.97	-3417.27	-4264.69	-7256.57	-6576.4	-5727.46	-5942.94	-3153.1	-3769.38	-2888.99	-3221.66
					7.5046	0.4636	0.0667	0.5273	19.1028	0.7334	0.0479	0.7598	13.8379	0.8461	0.0464	0.8505						155	0.824	0.067												229	-5014.62	-4855.04	-3764.29	-4696.21	-8108.37	-7071.9	-6375.18	-6663.36	-3567.69	-3982.84	-3189.16	-3551.48
					7.8422	0.4965	0.0658	0.5381	19.9873	0.7743	0.0117	0.7762	14.4768	0.8457	0.0563	0.8582						162	0.828	0.065												228	-5472.77	-5086.56	-4073.73	-5098.51	-8891	-7619.58	-7037.26	-7375.46	-3786.66	-4199.86	-3488.56	-3882.28
					8.1799	0.5537	0.0464	0.5481	20.8718	0.7982	0.0246	0.7918	15.1158	0.8551	0.0759	0.8652						169	0.8295	0.0635												227	-5872.84	-5202.36	-4387.43	-5483.65	-9650.18	-8148	-7648.63	-7956.74	-4017.2	-4375.17	-3799.21	-4118.18
					8.5176	0.5242	0.0393	0.5576	21.7563	0.8276	0.0551	0.8067	15.7548	0.8835	0.0414	0.8717						176	0.834	0.063												226	-6259.19	-5255.36	-4613.37	-5803.85	-10309.7	-8578.45	-8118.46	-8516.42	-4228.93	-4444.94	-3998.89	-4349.98
					8.8552	0.5035	0.1269	0.5666	22.6409	0.7916	0.0555	0.8209	16.3937	0.8819	0.0814	0.8778						183	0.8365	0.0615												225	-6571.68	-5334.48	-4815.3	-6027.13	-10899	-8861.77	-8481.65	-8940.54	-4481.4	-4506.65	-4222.59	-4487.44
					9.1929	0.5649	0.0607	0.5751	23.5254	0.8767	0.0762	0.8345	17.0327	0.8986	0.05	0.8834						190	0.839	0.059												224	-6889.65	-5324.81	-5034.56	-6194.46	-11342.3	-9006.2	-8775.8	-9358.68	-4629.05	-4510.89	-4276.88	-4686.48
					9.5305	0.5815	0.0573	0.5831	24.4099	0.8141	0.0673	0.8475	17.6716	0.8914	0.0581	0.8887						197	0.842	0.059												223	-7099.12	-5238.64	-5219.73	-6301.66	-11680.5	-8958.32	-9103.3	-9555.78	-4696.23	-4420.58	-4318.4	-4812.96
					9.8682	0.5802	0.0404	0.5907	25.2944	0.8748	0.0874	0.8601	18.3105	0.8958	0.0715	0.8936						204	0.8455	0.0565												222	-7189.89	-5018.57	-5280.97	-6319.99	-11961.6	-8918.87	-9273.27	-9666.3	-4810.15	-4396.9	-4339.8	-4849.43
					10.2058	0.5968	0.0281	0.598	26.1789	0.8499	0.1065	0.8722	18.9495	0.9393	0.0521	0.8984						211	0.8455	0.0565												221	-7290.94	-4880.38	-5269.35	-6322.33	-12048.4	-8856.6	-9263.97	-9678.06	-4839.77	-4297.83	-4419.79	-4838.02
					10.5435	0.579	0.0334	0.605	27.0635	0.8649	0.0482	0.8838	19.5885	0.9039	0.0529	0.9029						218	0.849	0.055												220	-7302.44	-4744.99	-5283.51	-6354.58	-12009.1	-8777.22	-9203.67	-9612.4	-4895.82	-4276.34	-4487.88	-4878.98
					10.8811	0.6413	0.0634	0.6117	27.948	0.9579	0.0297	0.895	20.2274	0.8816	0.0753	0.9072						225	0.8495	0.0545												219	-7301.03	-4683.17	-5235.14	-6266.82	-11886.1	-8611.37	-9172.35	-9464.15	-4848.42	-4134.33	-4411.16	-4859.29
					11.2188	0.6318	0.0595	0.6181	28.8325	0.995	0.1001	0.9059	20.8664	0.8817	0.0471	0.9113						232	0.8515	0.0545												218	-7286.75	-4543.93	-5220.78	-6196.79	-11775.7	-8316.18	-9030.5	-9348.28	-4920.07	-4114.23	-4380.38	-4863.47
					11.5564	0.6417	0.0706	0.6242	29.717	0.8818	0.0791	0.9164	21.5053	0.8965	0.0799	0.9153						239	0.8515	0.0535												217	-7286.51	-4426.03	-5277.64	-6129.19	-11577.5	-8223.26	-8797.52	-9320.65	-4945.69	-4076.82	-4426.24	-4876.67
					11.8941	0.601	0.0965	0.6302	30.6015	0.9586	0.1264	0.9265	22.1443	0.9203	0.0374	0.9191						246	0.8555	0.0515												216	-7311.61	-4385.38	-5313.62	-6145.32	-11481.3	-7949.36	-8632.3	-9229.14	-5015.6	-4028.14	-4608.91	-4949.32
					12.2317	0.5974	0.0808	0.6359	31.4861	0.9568	0.0683	0.9364	22.7832	0.94	0.0787	0.9228						253	0.8555	0.0525												215	-7476.41	-4427.03	-5214.82	-6144.83	-11426.8	-7845.24	-8542.27	-9137.88	-5229.16	-4113.04	-4725.37	-5058.9
					12.5694	0.6092	0.0674	0.6414	32.3706	0.9551	0.0696	0.9459	23.4222	0.9443	0.0416	0.9264						260	0.857	0.051												214	-7723.36	-4604.19	-5301.36	-6214.58	-11432.9	-7796.93	-8586.45	-9122.38	-5566.41	-4360.55	-4934.09	-5335.47
					12.907	0.6515	0.067	0.6468	33.2551	0.8958	0.0477	0.9552	24.0611	0.9679	0.0495	0.9299						267	0.858	0.051												213	-8021.14	-4650.15	-5491.82	-6366.64	-11530.6	-8005.66	-8750.26	-9298.31	-5948.85	-4830.11	-5177.62	-5598.47
					13.2447	0.6789	0.0684	0.652	34.1396	0.9518	0.0799	0.9641	24.7001	0.9535	0.0271	0.9333						274	0.859	0.05												212	-8667.17	-4848.27	-5795.51	-6764.67	-11926.1	-8343.32	-9153.02	-9502.98	-6605.69	-5147.6	-5558.45	-5999.66
					13.5823	0.6123	0.0499	0.6571	35.0241	1.0027	0.063	0.9728	25.339	0.9691	0.0619	0.9366						281	0.859	0.051												211	-9515.47	-5218.4	-6269.47	-7336.91	-12590.5	-8819.06	-9566.24	-9974.73	-7417.23	-5615.28	-6140.51	-6647.66
					13.92	0.6831	0.0707	0.6621	35.9087	0.9947	0.1037	0.9813	25.978	0.9742	0.0695	0.9398						288	0.861	0.05												210	-10525.1	-5759.16	-6848.54	-7892.04	-13526	-9394.56	-10160.3	-10650	-8423.78	-6261.19	-7032.66	-7551.81
					14.2576	0.6591	0.0909	0.6669	36.7932	1.0135	0.0785	0.9895	26.6169	0.946	0.033	0.9429						295	0.861	0.05												209	-11786.7	-6684.54	-7557.7	-8587.11	-14514.4	-9929.68	-11075.3	-11325.8	-9538.53	-7029.03	-7902.35	-8547.91
					14.5953	0.6462	0.1115	0.6716	37.6777	0.9696	0.0597	0.9975	27.2559	0.9601	0.0721	0.9459						302	0.861	0.051												208	-13137	-7443.24	-8220.96	-9278.61	-15458	-10605.7	-11798.7	-11940.4	-10923.2	-7996.88	-8923	-9724.99
					14.9329	0.7031	0.1023	0.6762	38.5622	1.0287	0.1086	1.0052	27.8948	0.9661	0.0538	0.9489						309	0.8635	0.0495												207	-14578.4	-7977.08	-9104.95	-10019.2	-16173.6	-11143.4	-12131.5	-12283.7	-12641.8	-9207.99	-10035	-10672
					15.2706	0.6738	0.1294	0.6807	39.4467	0.9528	0.1678	1.0128	28.5338	0.9822	0.0446	0.9518						316	0.864	0.049												206	-15889.3	-8441.32	-9879.89	-10519.9	-16456.7	-11353.2	-12282	-12481.4	-14204.6	-10301.3	-11360.2	-11769.9
					15.6082	0.6861	0.0953	0.6851	40.3313	1.058	0.0491	1.0201	29.1727	0.9651	0.0763	0.9546						323	0.8635	0.0495												205	-17439	-9058.86	-10699.8	-10894.6	-16426.6	-11167.1	-12214.7	-12388.7	-16048.2	-11601.2	-12680.5	-12954.3
					15.9459	0.669	0.102	0.6894	41.2158	1.0201	0.1161	1.0272	29.8117	0.9792	0.0826	0.9574						330	0.8655	0.0495												204	-18383.6	-9772.02	-11150.8	-11350.2	-15893.6	-10786.3	-11940.4	-12045.5	-17666.4	-12877.4	-13797.1	-14210.2
					16.2835	0.7444	0.0596	0.6936	42.1003	1.0087	0.095	1.0342	30.4506	0.9717	0.0687	0.9601						337	0.865	0.049												203	-19062.6	-10299.9	-11330	-11720.7	-14982.6	-9747.78	-11336.1	-11413.8	-19379.8	-14509.3	-14627.4	-15069.7
					16.6212	0.6921	0.0537	0.6978	42.9848	1.0686	0.1576	1.0409	31.0896	0.981	0.07	0.9628						344	0.8655	0.0495												202	-19339.2	-10551.3	-11447.6	-11490.3	-13574.3	-8665.59	-10318.5	-10124.9	-20640.2	-15144.4	-15181.9	-16177
					16.9589	0.6974	0.1104	0.7019	43.8693	1.0935	0.1126	1.0475	31.7286	0.9535	0.042	0.9653						351	0.865	0.05												201	-19440.1	-10731.8	-11256.3	-11229.5	-11644.4	-7088.76	-8671.37	-8525.84	-21804.1	-15850.1	-15862.9	-16075.5
					17.2965	0.6863	0.0889	0.7059	44.7539	1.0404	0.0966	1.0539	32.3675	0.9826	0.0729	0.9679						358	0.8655	0.0495												200	-19595.7	-10277.1	-10743.6	-10430.2	-8990.32	-5652.55	-6662.8	-6184.72	-22777.3	-15856.1	-16459.4	-16445.7
					17.6342	0.7086	0.1089	0.7099	45.6384	1.0624	0.1562	1.0601	33.0065	1.0096	0.0952	0.9703						365	0.8665	0.0495												201	-18407	-8840.34	-10238	-9128.89	-5897.92	-2808.29	-3958.4	-3255.45	-22166.1	-16436.7	-16451.4	-16292.6
					17.9718	0.7454	0.0948	0.7138	46.5229	1.0853	0.1404	1.0661	33.6454	0.9766	0.0762	0.9728						372	0.8665	0.0505												202	-16937.8	-7953.21	-8651.48	-7080.48	-1599.77	625.364	-732.617	-3.6571	-21034.3	-15784.3	-15411.1	-15048.6
					18.3095	0.7262	0.1199	0.7176	47.4074	1.0537	0.148	1.072	34.2844	0.9856	0.0617	0.9751						379	0.8675	0.0495
					18.6471	0.7282	0.0919	0.7214	48.2919	1.0307	0.151	1.0778	34.9233	0.9678	0.0658	0.9774						386	0.869	0.05
					18.9848	0.6745	0.0617	0.7251	49.1765	1.0384	0.1434	1.0833	35.5623	0.9699	0.0812	0.9797						393	0.8685	0.0495
					19.3224	0.7097	0.1277	0.7288	50.061	1.0401	0.1586	1.0888	36.2012	0.9813	0.0592	0.9819						400	0.869	0.049
					19.6601	0.7564	0.0532	0.7324	50.9455	1.0912	0.1077	1.0941	36.8402	0.9942	0.0597	0.9841						407	0.8695	0.0495
					19.9977	0.7514	0.0311	0.7359	51.83	1.0863	0.168	1.0992	37.4791	1.0062	0.1077	0.9862						414	0.8695	0.0495
					20.3354	0.7397	0.0676	0.7395	52.7145	1.1095	0.1269	1.1042	38.1181	0.9706	0.0849	0.9883						421	0.87	0.05
					20.673	0.7601	0.0511	0.7429	53.5991	1.1	0.1051	1.1091	38.757	0.9852	0.0547	0.9903						428	0.8705	0.0495
					21.0107	0.7998	0.071	0.7464	54.4836	1.1084	0.1319	1.1139	39.396	0.994	0.1084	0.9923						435	0.8705	0.0505
					21.3483	0.7688	0.043	0.7498	55.3681	1.0959	0.1193	1.1185	40.0349	0.9961	0.1004	0.9943						442	0.871	0.05
					21.686	0.7794	0.0965	0.7531	56.2526	1.173	0.1669	1.123	40.6739	0.9841	0.0879	0.9962						449	0.872	0.05
					22.0236	0.7472	0.0783	0.7564	57.1371	1.167	0.1695	1.1274	41.3128	0.9926	0.106	0.9981						456	0.8715	0.0495
					22.3613	0.7905	0.1289	0.7597	58.0217	1.1219	0.1625	1.1316	41.9518	0.99	0.0951	0.9999						463	0.8715	0.0505
					22.6989	0.7526	0.0728	0.7629	58.9062	1.1677	0.1545	1.1358	42.5907	1.0255	0.1024	1.0017						470	0.8725	0.0505
					23.0366	0.8211	0.0857	0.7661	59.7907	1.1176	0.1497	1.1399	43.2297	1.0139	0.1054	1.0034						477	0.873	0.05
					23.3742	0.7844	0.0829	0.7693	60.6752	1.1612	0.1821	1.1438	43.8686	1.0216	0.079	1.0051						484	0.8725	0.0505
					23.7119	0.7697	0.1104	0.7724	61.5597	1.1364	0.0928	1.1476	44.5076	1.0212	0.0859	1.0068						491	0.8735	0.0505
					24.0495	0.6993	0.1292	0.7755	62.4443	1.1127	0.1819	1.1514	45.1465	1.0432	0.1249	1.0085						498	0.874	0.051
					24.3872	0.8033	0.1498	0.7785	63.3288	1.1652	0.1393	1.155	45.7855	1.0081	0.0719	1.0101						505	0.874	0.051
					24.7248	0.7701	0.1148	0.7816	64.2133	1.1692	0.1186	1.1586	46.4244	1.01	0.0922	1.0116						512	0.8745	0.0515
					25.0625	0.7671	0.0998	0.7845	65.0978	1.125	0.1697	1.162	47.0634	1.0205	0.1257	1.0132						519	0.8745	0.0515
					25.4002	0.7621	0.1552	0.7875	65.9823	1.2179	0.1423	1.1654	47.7024	1.0114	0.0998	1.0147						526	0.8755	0.0515
					25.7378	0.7434	0.0677	0.7904	66.8669	1.1423	0.1487	1.1687	48.3413	0.9921	0.112	1.0162						533	0.8755	0.0515
					26.0755	0.8236	0.1183	0.7933	67.7514	1.1841	0.1402	1.1719	48.9803	1.0316	0.0839	1.0176						540	0.876	0.052
					26.4131	0.8204	0.0953	0.7962	68.6359	1.2084	0.1907	1.175	49.6192	0.9899	0.0779	1.019						547	0.8755	0.0525
					26.7508	0.7936	0.0919	0.799	69.5204	1.2097	0.1771	1.178	50.2582	1.0186	0.1105	1.0204						554	0.8765	0.0525
					27.0884	0.8205	0.0937	0.8018	70.4049	1.1865	0.2021	1.1809	50.8971	1.0101	0.0888	1.0218						561	0.8765	0.0525
					27.4261	0.7613	0.1043	0.8045	71.2895	1.1404	0.237	1.1838	51.5361	1.0301	0.123	1.0231						568	0.8765	0.0525
					27.7637	0.7794	0.0413	0.8073	72.174	1.1881	0.1984	1.1866	52.175	1.0147	0.1075	1.0244						575	0.8775	0.0525
					28.1014	0.7973	0.0751	0.81	73.0585	1.1935	0.2122	1.1893	52.814	1.0348	0.1169	1.0257						582	0.878	0.053
					28.439	0.8348	0.1027	0.8126	73.943	1.2124	0.2238	1.192	53.4529	1.0396	0.101	1.0269						589	0.8775	0.0535
					28.7767	0.7636	0.1223	0.8153	74.8275	1.1983	0.1621	1.1945	54.0919	1.0376	0.1133	1.0281						596	0.878	0.053
					29.1143	0.8183	0.0868	0.8179	75.7121	1.1626	0.2047	1.1971	54.7308	1.0175	0.1312	1.0293						603	0.878	0.053
					29.452	0.8526	0.0639	0.8205	76.5966	1.1986	0.2096	1.1995	55.3698	1.0546	0.1271	1.0305						610	0.8785	0.0535
					29.7896	0.8393	0.0411	0.8231	77.4811	1.2007	0.2879	1.2019	56.0087	1.0284	0.1243	1.0316						617	0.8785	0.0535
					30.1273	0.8319	0.1234	0.8256	78.3656	1.1946	0.3051	1.2042	56.6477	1.0157	0.1085	1.0328						624	0.879	0.054
					30.4649	0.7822	0.106	0.8281	79.2501	1.1928	0.1903	1.2065	57.2866	1.0118	0.1411	1.0339						631	0.8795	0.0535
					30.8026	0.8014	0.0872	0.8306	80.1347	1.2361	0.2547	1.2087	57.9256	1.0391	0.1789	1.0349						638	0.8795	0.0535
					31.1402	0.8244	0.1186	0.833					58.5645	1.0398	0.1784	1.036						645	0.8795	0.0545
					31.4779	0.8777	0.105	0.8355					59.2035	1.0483	0.1856	1.037						652	0.88	0.054
					31.8155	0.8335	0.1176	0.8379					59.8424	1.0369	0.1316	1.038						659	0.881	0.054
					32.1532	0.8216	0.1124	0.8403					60.4814	1.0291	0.1209	1.039						666	0.8805	0.0545
					32.4908	0.8798	0.0898	0.8426					61.1203	1.0184	0.1315	1.04						673	0.881	0.054
					32.8285	0.8456	0.1232	0.8449					61.7593	1.0386	0.1456	1.0409						680	0.8815	0.0545
					33.1661	0.7887	0.1087	0.8473					62.3982	1.0582	0.1632	1.0418						687	0.8815	0.0545
					33.5038	0.8336	0.0926	0.8495					63.0372	1.0321	0.1442	1.0427						694	0.8825	0.0545
					33.8414	0.8691	0.1001	0.8518					63.6762	1.0385	0.1469	1.0436						701	0.882	0.055
					34.1791	0.8931	0.1562	0.854					64.3151	1.0377	0.1369	1.0445						708	0.8825	0.0545
					34.5167	0.8437	0.0447	0.8562					64.9541	1.0527	0.1732	1.0453						715	0.8825	0.0545
					34.8544	0.8567	0.0529	0.8584					65.593	1.0147	0.1057	1.0462						722	0.8835	0.0545
					35.192	0.8834	0.0242	0.8606					66.232	1.0302	0.1466	1.047						729	0.8835	0.0545
					35.5297	0.8163	0.0643	0.8627					66.8709	1.0482	0.1196	1.0478						736	0.8835	0.0545
					35.8674	0.8585	0.0918	0.8648					67.5099	0.9999	0.1407	1.0486						743	0.884	0.054
					36.205	0.8188	0.0577	0.8669					68.1488	1.0272	0.1485	1.0493						750	0.884	0.055
					36.5427	0.8796	0.1089	0.869					68.7878	1.0303	0.1395	1.0501						757	0.8845	0.0545
					36.8803	0.8974	0.06	0.8711					69.4267	1.0402	0.138	1.0508						764	0.8845	0.0545
					37.218	0.9199	0.0555	0.8731					70.0657	1.0366	0.1481	1.0515						771	0.884	0.054
					37.5556	0.9472	0.1827	0.8751					70.7046	1.0168	0.1717	1.0522						778	0.885	0.055
					37.8933	0.8854	0.0996	0.8771					71.3436	1.06	0.1563	1.0529						785	0.8855	0.0545
					38.2309	0.8966	0.1227	0.8791					71.9825	1.0402	0.1501	1.0536						792	0.8855	0.0545
					38.5686	0.9116	0.1205	0.881					72.6215	1.0659	0.1834	1.0542						799	0.886	0.055
					38.9062	0.8842	0.0742	0.8829					73.2604	1.0186	0.1566	1.0549						806	0.886	0.054
					39.2439	0.8299	0.1087	0.8849					73.8994	1.0174	0.1564	1.0555						813	0.8865	0.0545
					39.5815	0.9251	0.1735	0.8867					74.5383	1.0489	0.163	1.0561						820	0.886	0.055
					39.9192	0.8566	0.0646	0.8886					75.1773	1.073	0.161	1.0567						827	0.8865	0.0545
					40.2568	0.8511	0.1658	0.8905					75.8162	1.0432	0.1764	1.0573						834	0.8875	0.0545
					40.5945	0.8699	0.1432	0.8923					76.4552	1.0532	0.1339	1.0579						841	0.887	0.054
					40.9321	0.9724	0.1514	0.8941					77.0941	1.044	0.1686	1.0585						848	0.887	0.054
					41.2698	0.9365	0.065	0.8959					77.7331	1.0401	0.1502	1.059						855	0.8875	0.0545
					41.6074	0.9461	0.0994	0.8977					78.372	1.0743	0.1972	1.0596						862	0.8875	0.0545
					41.9451	0.949	0.1942	0.8994					79.011	1.0921	0.2062	1.0601						869	0.888	0.054
					42.2828	0.9172	0.0907	0.9011					79.65	1.0644	0.1696	1.0606						876	0.888	0.054
					42.6204	0.8965	0.0699	0.9029					80.2889	1.0717	0.1977	1.0611						883	0.888	0.054
					42.9581	0.9132	0.1516	0.9046					80.9279	1.0414	0.142	1.0616						890	0.8885	0.0545
					43.2957	0.9134	0.1068	0.9062					81.5668	1.0757	0.193	1.0621						897	0.8885	0.0545
					43.6334	0.8951	0.1212	0.9079					82.2057	1.0667	0.1757	1.0626						904	0.8885	0.0545
					43.971	0.9175	0.09	0.9096					82.8447	1.073	0.1769	1.0631						911	0.889	0.054
					44.3087	0.9058	0.1055	0.9112					83.4837	1.0579	0.1708	1.0635						918	0.889	0.054
					44.6463	0.9027	0.0614	0.9128					84.1226	1.0467	0.1542	1.064						925	0.889	0.054
					44.984	0.9319	0.0407	0.9144					84.7616	1.0471	0.1922	1.0644						932	0.8895	0.0545
					45.3216	0.91	0.199	0.916					85.4005	1.088	0.1593	1.0648						939	0.8895	0.0545
					45.6593	0.8899	0.0771	0.9175					86.0395	1.1036	0.1931	1.0652						946	0.89	0.054
					45.9969	0.8853	0.0863	0.9191					86.6784	1.0779	0.2103	1.0657						953	0.89	0.054
					46.3346	0.9309	0.0889	0.9206					87.3174	1.1002	0.2101	1.0661						960	0.8905	0.0545
					46.6722	0.8875	0.1564	0.9221					87.9563	1.0715	0.2392	1.0665						967	0.891	0.054
					47.0099	0.9567	0.1262	0.9236					88.5953	1.0629	0.2043	1.0668						974	0.8905	0.0545
					47.3475	0.924	0.0459	0.9251					89.2342	1.0861	0.1666	1.0672						981	0.8905	0.0545
					47.6852	0.9074	0.1134	0.9266					89.8732	1.0879	0.186	1.0676						988	0.891	0.054
					48.0228	0.959	0.1424	0.928														995	0.891	0.055
					48.3605	0.9354	0.1173	0.9294														1002	0.8915	0.0545
					48.6981	0.9233	0.111	0.9309														1009	0.8915	0.0545
					49.0358	0.8926	0.0724	0.9323														1016	0.8915	0.0545
					49.3734	0.9613	0.1052	0.9337														1023	0.8915	0.0545
					49.7111	0.9267	0.1006	0.935														1030	0.892	0.054
					50.0487	0.9038	0.0978	0.9364														1037	0.8915	0.0545
					50.3864	0.9437	0.0727	0.9378														1044	0.892	0.054
					50.7241	0.9211	0.041	0.9391														1051	0.892	0.054
					51.0617	0.8963	0.1306	0.9404														1058	0.892	0.054
					51.3994	0.9617	0.1121	0.9417														1065	0.8925	0.0545
					51.737	0.9003	0.1503	0.943														1072	0.893	0.054
					52.0747	0.8758	0.1213	0.9443														1079	0.893	0.054
					52.4123	0.9545	0.1288	0.9456														1086	0.893	0.054
					52.75	0.9366	0.0425	0.9468														1093	0.893	0.054
					53.0876	1.0087	0.1391	0.948														1100	0.893	0.054
					53.4253	0.9762	0.1744	0.9493														1107	0.8935	0.0535
					53.7629	0.9362	0.0961	0.9505														1114	0.8935	0.0545
					54.1006	1.0031	0.1208	0.9517														1121	0.894	0.054
					54.4382	0.9753	0.1433	0.9529														1128	0.894	0.054
					54.7759	0.903	0.1184	0.954														1135	0.894	0.054
					55.1135	0.9618	0.1023	0.9552														1142	0.894	0.054
					55.4512	0.9571	0.1155	0.9564														1149	0.894	0.054
					55.7888	0.978	0.1229	0.9575														1156	0.894	0.054
					56.1265	0.9883	0.0641	0.9586														1163	0.894	0.054
					56.4641	0.9592	0.1275	0.9597														1170	0.894	0.054
					56.8018	0.9513	0.1183	0.9608														1177	0.8945	0.0535
					57.1394	1.0065	0.1043	0.9619														1184	0.895	0.054
					57.4771	0.9528	0.1534	0.963														1191	0.8945	0.0535
					57.8147	0.96	0.1334	0.9641														1198	0.895	0.054
					58.1524	0.9811	0.1529	0.9652														1205	0.895	0.054
					58.49	0.9618	0.0757	0.9662														1212	0.895	0.054
					58.8277	0.9635	0.1216	0.9672														1219	0.895	0.054
					59.1654	0.9665	0.1021	0.9683														1226	0.8945	0.0535
					59.503	1.0181	0.1789	0.9693														1233	0.895	0.054
					59.8407	1.0112	0.0986	0.9703														1240	0.895	0.053
					60.1783	0.9893	0.1364	0.9713														1247	0.895	0.053
					60.516	0.9186	0.1291	0.9723														1254	0.895	0.054
					60.8536	0.9647	0.1025	0.9732														1261	0.896	0.054
					61.1913	0.9347	0.1816	0.9742														1268	0.896	0.054
					61.5289	1.0021	0.0719	0.9751														1275	0.8955	0.0535
					61.8666	0.9985	0.1404	0.9761														1282	0.896	0.054
					62.2042	0.9471	0.1069	0.977														1289	0.896	0.054
					62.5419	0.9802	0.1695	0.9779														1296	0.8955	0.0535
					62.8795	0.9201	0.0876	0.9789														1303	0.8955	0.0535
					63.2172	1.0089	0.1538	0.9798														1310	0.8965	0.0535
					63.5548	1.0186	0.1114	0.9807														1317	0.8965	0.0535
					63.8925	0.9639	0.1093	0.9815														1324	0.896	0.053
					64.2301	0.9228	0.0605	0.9824														1331	0.896	0.053
					64.5678	0.9992	0.1056	0.9833														1338	0.896	0.053
					64.9054	0.9658	0.1332	0.9841														1345	0.896	0.053
					65.2431	1.0307	0.1781	0.985														1352	0.896	0.053
					65.5807	0.9572	0.1307	0.9858														1359	0.896	0.053
					65.9184	1.0013	0.1458	0.9867														1366	0.896	0.053
					66.256	0.9784	0.1634	0.9875														1373	0.896	0.053
					66.5937	0.9934	0.1575	0.9883														1380	0.896	0.053
					66.9313	0.9388	0.1503	0.9891														1387	0.896	0.053
					67.269	0.9944	0.144	0.9899														1394	0.896	0.053
					67.6067	0.9628	0.1182	0.9907														1401	0.896	0.053
					67.9443	0.9621	0.1338	0.9915														1408	0.8965	0.0525
					68.282	0.9657	0.1356	0.9922														1415	0.897	0.053
					68.6196	1.0395	0.1307	0.993														1422	0.897	0.053
					68.9573	1.0539	0.1861	0.9938														1429	0.897	0.053
					69.2949	1.0081	0.0582	0.9945														1436	0.897	0.053
					69.6326	0.9853	0.1006	0.9953
					69.9702	0.996	0.0987	0.996
					70.3079	1.0066	0.135	0.9967
					70.6455	1.0034	0.1656	0.9974
					70.9832	0.9939	0.113	0.9981
					71.3208	1.0228	0.1583	0.9988
					71.6585	0.9892	0.1706	0.9995
					71.9961	1.0658	0.1664	1.0002
					72.3338	0.9427	0.127	1.0009
					72.6714	0.9962	0.1695	1.0016
					73.0091	0.9982	0.102	1.0022
					73.3467	0.96	0.1559	1.0029
					73.6844	1.0472	0.1168	1.0036
					74.022	0.9062	0.1426	1.0042
					74.3597	1.005	0.134	1.0048
					74.6973	0.9566	0.1168	1.0055
					75.035	0.9787	0.0739	1.0061
					75.3726	1.0429	0.1214	1.0067
					75.7103	0.9409	0.1084	1.0073
					76.0479	1.012	0.0804	1.0079
					76.3856	1.0437	0.0931	1.0085
					76.7233	0.9704	0.1311	1.0091
					77.0609	1.0142	0.1328	1.0097
					77.3985	1.0369	0.1196	1.0103
					77.7362	1.017	0.1004	1.0109
					78.0739	0.9596	0.1922	1.0114
					78.4115	1.0419	0.1628	1.012
					78.7492	1.0669	0.2126	1.0126
					79.0868	1.0199	0.1782	1.0131
					79.4245	1.0258	0.1656	1.0137
					79.7621	1.0649	0.185	1.0142
					80.0998	1.0066	0.2183	1.0147
[truncated: 6 more columns]

## Sheet: Figure 6
OD (350nm) and Fluorescence intensity as a function of time (panel 5B and 5C)										Far-UV CD signal (panel 6E-6H)															OD (350nm) as a function of time (panel 5I and 5J)
	FruR WT				FruR Y19A						only protein		WT + polyP			Y19A + polyP			Time (h)	WT MRE @ 222 nm	fit	Y19A MRE @ 222 nm	fit		Time(min)	WT OD 350 nm	Error	Y19A OD 350 nm	Error
Time(min)	OD 350 nm	Error	ThT flu	Error	OD 350 nm	Error	ThT flu	Error		wavelength (nm)	FruR WT MRE	FruR Y19A MRE	MRE @0h	MRE @1h	MRE @4h	MRE @0h	MRE @1h	MRE @4h	0	-2617.12	-2598.37	-6628.42	-6672.43		1	0.0085	0.000707107	0.0035	0.00212132
1	0.483	0.0282843	178.5	47.3762	0.3025	0.0417193	8.5	2.12132		250	13.8523	85.8012	-931.511	-138.247	34.5667	-989.087	94.2903	73.427	0.25	-1234.15	-1331.27	-7130.26	-7086.8		8	0.007	0.00141421	0.002	0.00141421
8	0.8045	0.0841457	335	69.2965	0.212	0.0452548	20.5	2.12132		249	-17.2866	65.8278	-966.762	-119.868	42.5188	-1047.72	67.4413	56.8428	0.5	-999.649	-918.64	-6664.63	-6730.8		15	0.0065	0.000707107	0.002	0.00141421
15	0.968	0.0424264	434.5	53.033	0.1965	0.0190919	27.5	2.12132		248	-50.8054	23.1053	-977.787	-135.092	47.4511	-1125.72	35.6109	44.904	0.75	-916.26	-776.397	-6372.88	-6219.09		22	0.0065	0.000707107	0.0015	0.00212132
22	1.034	0.0183848	540	48.0833	0.237	0.00282843	44.5	4.94975		247	-126.482	-24.6011	-1048.94	-145.784	36.9028	-1222.01	5.1962	19.8071	1	-780.269	-719.908	-6145.4	-6064.1		29	0.007	0.00141421	0.002	0.00141421
29	1.113	0.0141421	640.5	45.9619	0.2955	0.0190919	71.5	2.12132		246	-231.751	-98.6334	-1125.7	-156.863	4.8443	-1325.28	-14.5507	8.6711	1.25	-657.531	-690.799	-5972.39	-5973.97		36	0.007	0.00141421	0.002	0.00141421
36	1.172	0.00282843	715.5	55.8614	0.398	0.0240416	92	1.41421		245	-368.197	-199.58	-1164.55	-184.694	-12.6411	-1468.45	-41.5376	-25.5024	1.5	-597.079	-670.612	-5816.07	-5886.71		43	0.007	0.00141421	0.002	0.00141421
43	1.218	0.0226274	778.5	50.2046	0.4565	0.0176777	109.5	4.94975		244	-550.75	-317.765	-1201.69	-236.168	-26.1035	-1623.83	-84.3132	-61.0637	1.75	-593.459	-653.506	-5766.35	-5800.34		50	0.0065	0.000707107	0.002	0.00141421
50	1.2545	0.0148492	849.5	60.1041	0.486	0.0113137	158.5	2.12132		243	-784.842	-469.497	-1333.61	-279.705	-33.7331	-1779.07	-138.744	-94.7919	2	-563.283	-637.629	-5689.83	-5714.84		57	0.0075	0.000707107	0.002	0.00141421
57	1.299	0.0480833	894.5	72.832	0.5335	0.000707107	200.5	9.19239		242	-1071.97	-695.914	-1497.74	-317.755	-30.766	-1958.09	-241.002	-167.126	2.25	-588.396	-622.387	-5581.5	-5630.21		64	0.007	0.00141421	0.002	0.00141421
64	1.3085	0.0247487	923.5	58.6899	0.5765	0.00636396	262	16.9706		241	-1426.74	-946.709	-1630.15	-360.617	-39.7423	-2173.24	-375.334	-262.288	2.5	-574.289	-607.59	-5513.07	-5546.45		71	0.0065	0.000707107	0.002	0.00141421
71	1.3295	0.0233345	960.5	51.6188	0.626	0.0212132	315	16.9706		240	-1853.36	-1270.73	-1799.19	-379.021	-64.7641	-2388.49	-513.555	-368.205	2.75	-550.634	-593.169	-5416.14	-5463.56		78	0.0065	0.000707107	0.002	0.00141421
78	1.373	0.00565685	972	66.468	0.681	0.0212132	366	19.799		239	-2399.75	-1647.36	-1921.66	-457.332	-92.064	-2654.6	-654.078	-493.54	3	-593.208	-579.099	-5350.63	-5381.53		85	0.007	0.00141421	0.002	0.00141421
85	1.4015	0.0190919	983	82.0244	0.717	0.00707107	429.5	20.5061		238	-3058.36	-2106.31	-2058.84	-477.953	-135.932	-2947.62	-849.398	-643.561	3.25	-564.142	-565.365	-5305.27	-5300.37		92	0.006	0.00141421	0.001	0.00141421
92	1.428	0.00424264	987	83.4386	0.755	0.00424264	487	29.6985		237	-3849.78	-2673.16	-2176.43	-536.076	-172.79	-3333.32	-1076.12	-820.358	3.5	-593.139	-551.957	-5241.82	-5220.07		99	0.007	0.00141421	0.002	0.00141421
99	1.4525	0.0120208	982.5	68.5894	0.7895	0.00636396	555.5	26.163		236	-4733.48	-3339.71	-2360.32	-573.653	-171.986	-3712.71	-1328.77	-1021.69	3.75	-585.879	-538.868	-5150.76	-5140.64		106	0.007	0.00141421	0.002	0.00141421
106	1.4725	0.013435	995.5	79.9031	0.8155	0.00636396	614	29.6985		235	-5764.87	-4099.25	-2511.31	-673.785	-190.004	-4065.49	-1590.58	-1270.14	4	-575.292	-526.089	-5149.85	-5062.06		113	0.0035	0.000707107	-0.002	0.00141421
113	1.478	0.00282843	1009.5	94.0452	0.8235	0.00212132	671.5	23.3345		234	-6929.3	-4957.22	-2713.6	-721.105	-222.961	-4402.13	-1918.91	-1542.41							120	0.0055	0.000707107	0	0.00141421
120	1.485	0.0141421	1010.5	61.5183	0.823	0.00282843	715	1.41421		233	-8157.89	-5906.25	-2889.53	-709.82	-255.019	-4740.27	-2261.31	-1852.98							127	0.0075	0.000707107	0.0025	0.00212132
127	1.4925	0.0247487	1007.5	95.4594	0.8345	0.000707107	725	7.07107		232	-9510.66	-6939.79	-3038.9	-763.457	-275.479	-5123.14	-2662.56	-2158.28							134	0.0055	0.000707107	0.001	0.00141421
134	1.5025	0.0304056	1030.5	88.3883	0.8455	0.00212132	733	8.48528		231	-10885.9	-8029.64	-3116.18	-792.717	-281.547	-5447.46	-3091.9	-2484.97							141	0.0085	0.000707107	0.003	0.00141421
141	1.503	0.0311127	1041.5	79.9031	0.859	0.00565685	749	19.799		230	-12319.8	-9166.97	-3153.88	-818.695	-336.67	-5801.36	-3527.04	-2862.12							148	0.0085	0.000707107	0.0035	0.00212132
148	1.5055	0.0346482	1044.5	72.832	0.8695	0.00494975	747.5	24.7487		229	-13691.7	-10313.1	-3195.07	-833.181	-398.373	-6091.32	-3959.76	-3256.33							155	0.0055	0.000707107	0.001	0.00141421
155	1.514	0.0339411	1060.5	75.6604	0.8755	0.00212132	753	18.3848		228	-15037.9	-11427.2	-3191.78	-858.793	-468.179	-6301.44	-4361.66	-3598.11							162	0.0085	0.000707107	0.0035	0.00212132
162	1.516	0.0353553	1074.5	77.0746	0.884	0.00282843	761.5	16.2635		227	-16268.5	-12482.4	-3255.54	-882.273	-492.718	-6456.8	-4727.76	-3900.35							169	0.0035	0.000707107	-0.0005	0.00212132
169	1.5185	0.0318198	1071	69.2965	0.8875	0.000707107	763	12.7279		226	-17365.4	-13453.9	-3145.85	-903.668	-501.737	-6587.64	-5102.55	-4222.48							176	0.0075	0.000707107	0.003	0.00141421
176	1.5185	0.033234	1085.5	79.9031	0.8945	0.00212132	769.5	12.0208		225	-18276.1	-14320.4	-3075.69	-876.508	-522.402	-6663.09	-5416.58	-4535.35							183	0.003	0	-0.0015	0.00212132
183	1.525	0.0311127	1089.5	77.0746	0.8945	0.00494975	789	0		224	-19046.5	-15065.5	-2997.7	-829.216	-556.302	-6691.4	-5744.63	-4800.23							190	0.0085	0.000707107	0.0035	0.00212132
190	1.521	0.0353553	1111.5	95.4594	0.8975	0.00353553	808.5	6.36396		223	-19564.1	-15655.5	-2874.75	-789.532	-587.509	-6672.03	-5962.74	-5004.12							197	0.004	0	-0.001	0.00141421
197	1.5265	0.0289914	1114.5	99.7021	0.899	0.00282843	813.5	14.8492		222	-19888	-16093.9	-2617.12	-780.269	-575.292	-6628.42	-6145.4	-5149.85							204	0.0065	0.000707107	0.0015	0.00212132
204	1.53	0.0282843	1127.5	95.4594	0.9005	0.00494975	822.5	4.94975		221	-20021.3	-16375.8	-2386.64	-770.375	-573.716	-6584.1	-6252.42	-5276.49							211	0.0065	0.000707107	0.0015	0.00212132
211	1.53	0.0282843	1146	90.5097	0.9	0.00565685	838.5	13.435		220	-20004.8	-16488.3	-2192.14	-684.798	-579.399	-6469.9	-6320.03	-5368.56							218	0.0085	0.000707107	0.003	0.00141421
218	1.531	0.0296985	1144.5	86.9741	0.901	0.00848528	854.5	16.2635		219	-19840.7	-16478.4	-1998.34	-621.286	-605.399	-6347.52	-6326.18	-5406.58							225	0.006	0	0.001	0.00141421
225	1.5275	0.0289914	1175	65.0538	0.903	0.00848528	865	15.5563		218	-19624.9	-16431.6	-1736.71	-602.857	-600.098	-6178.19	-6321.82	-5439.78							232	0.009	0	0.004	0.00141421
232	1.5305	0.0289914	1191	70.7107	0.905	0.0113137	870.5	19.0919		217	-19334.3	-16313.2	-1477.48	-561.205	-550.684	-6102.99	-6292.13	-5395.67							239	0.0065	0.000707107	0.001	0.00141421
239	1.5275	0.0318198	1213.5	68.5894	0.9055	0.00919239	890	31.1127		216	-19032.3	-16231.9	-1223.89	-466.643	-506.696	-6001.45	-6235.55	-5369.18							246	0.0015	0.000707107	-0.004	0.00141421
246	1.533	0.0282843	1212	63.6396	0.9065	0.0106066	891.5	37.4767		215	-18764.2	-16214.5	-997.283	-338.341	-478.552	-5920.36	-6222.7	-5322.32							253	0.0005	0.000707107	-0.0045	0.00212132
253	1.536	0.0311127	1224	74.9533	0.908	0.00989949	913.5	31.8198		214	-18585.7	-16287.9	-799.77	-320.642	-451.806	-5901.24	-6250.16	-5303.95							260	0.0055	0.000707107	0	0.00141421
260	1.5365	0.026163	1236	76.3675	0.9085	0.0106066	905	38.1838		213	-18624.5	-16507.5	-665.795	-219.991	-414.341	-6047.56	-6232.29	-5295.55							267	0.0065	0.000707107	0.0015	0.00212132
267	1.5375	0.0304056	1241	80.6102	0.9095	0.00777817	920	38.1838		212	-18893.5	-16902.4	-705.779	-275.29	-390.291	-6266.08	-6285.96	-5340.69							274	0.008	0	0.003	0.00141421
274	1.5385	0.0304056	1240	72.1249	0.9105	0.00636396	927.5	43.1335		211	-19342	-17550.8	-647.697	-319.062	-385.996	-6478.71	-6447.68	-5435.04							281	0.0075	0.000707107	0.002	0.00141421
281	1.541	0.0254558	1251	84.8528	0.9115	0.00636396	945.5	40.3051		210	-19864.1	-18397.6	-714.754	-412.639	-361.771	-6686.86	-6684.07	-5557.17							288	0.0035	0.000707107	-0.002	0.00141421
288	1.5425	0.0289914	1262.5	92.631	0.912	0.00707107	957.5	40.3051		209	-20460.3	-19246.5	-656.258	-345.269	-342.658	-6992.11	-6943.9	-5692.12							295	0.009	0	0.0045	0.00212132
295	1.543	0.0268701	1267	94.7523	0.9145	0.00636396	961	35.3553		208	-20820.4	-19870.6	-650.277	-267.469	-261.831	-7307.34	-7015.47	-5770.58							302	0.004	0	-0.001	0.00141421
302	1.546	0.0254558	1270	98.9949	0.917	0.00565685	974	45.2548		207	-20526.6	-19961.7	-614.841	-182.103	-308.265	-7437.99	-6860.46	-5680.8							309	0.007	0	0.0025	0.00212132
309	1.548	0.0254558	1281	97.5807	0.9195	0.00353553	977	42.4264		206	-19346.3	-19311.8	-658.992	-146.757	-360.664	-7311.45	-6498.68	-5273.29							316	0.0015	0.000707107	-0.0035	0.00212132
316	1.548	0.0240416	1286.5	92.631	0.9165	0.00636396	998.5	48.7904		205	-17175.8	-17649.7	-496.549	-131.263	-245.228	-6715.76	-5900.92	-4716.26							323	0.009	0	0.004	0.00141421
323	1.5505	0.0219203	1290	94.7523	0.9185	0.00777817	995.5	48.7904		204	-13864.7	-15368.2	-387.686	-120.225	-96.6317	-5757.17	-5032.64	-3815.75							330	0.002	0	-0.003	0.00141421
330	1.5505	0.0219203	1295.5	106.773	0.918	0.00707107	1005.5	50.2046		203	-10020.3	-11952.5	-147.861	-16.9238	63.8315	-4483.16	-3833.99	-2816.72							337	0.009	0	0.004	0.00141421
337	1.552	0.0240416	1307	86.267	0.9185	0.00777817	1012.5	44.5477		202	-5741.64	-8078.54	94.6524	239.197	238.026	-3074.19	-2212.25	-1425							344	-0.006	0	-0.011	0.00141421
344	1.5525	0.0233345	1309.5	103.945	0.9185	0.00777817	1023.5	51.6188		201	-1805.92	-3769.48	393.962	435.956	458.031	-1307.77	-440.206	103.634							351	0.0065	0.000707107	0.0015	0.00212132
351	1.5535	0.0247487	1312.5	94.0452	0.92	0.00707107	1019.5	47.3762		200	1670.57	-77.4156	734.488	628.522	596.753	607.668	1480.93	1762.22							358	0.004	0	-0.001	0.00141421
358	1.554	0.0268701	1315.5	96.8736	0.92	0.00989949	1032.5	51.6188																	365	0.006	0	0.001	0.00141421
365	1.554	0.0268701	1332	97.5807	0.922	0.00989949	1038	45.2548																	372	-0.0005	0.000707107	-0.0055	0.00212132
372	1.554	0.0268701	1335.5	98.2878	0.923	0.00989949	1045	49.4975																	379	-0.004	0	-0.009	0.00141421
379	1.5565	0.026163	1334	93.3381	0.9235	0.0106066	1055.5	51.6188																	386	0.006	0	0.001	0.00141421
386	1.5575	0.0247487	1339.5	86.9741	0.9235	0.0106066	1046.5	37.4767																	393	0	0	-0.005	0.00141421
393	1.5585	0.026163	1353	94.7523	0.925	0.0127279	1061.5	50.2046																	400	0.004	0	-0.0005	0.00212132
400	1.5575	0.026163	1353	91.9239	0.9245	0.013435	1071	50.9117																	407	0.0045	0.000707107	-0.001	0.00141421
407	1.5585	0.026163	1357.5	91.2168	0.924	0.0127279	1086	43.8406																	414	0.006	0	0.001	0.00141421
414	1.5585	0.0247487	1354	82.0244	0.923	0.0127279	1072.5	38.8909																	421	0.009	0	0.004	0.00141421
421	1.5595	0.026163	1354.5	94.0452	0.9245	0.013435	1086.5	50.2046																	428	0.005	0	0	0.00141421
428	1.5595	0.026163	1370	82.0244	0.924	0.0127279	1092.5	53.033																	435	0.0015	0.000707107	-0.0035	0.00212132
435	1.5605	0.0247487	1373	96.1665	0.926	0.0113137	1105.5	55.8614																	442	0.007	0	0.0025	0.00212132
442	1.5615	0.0247487	1382.5	85.5599	0.9255	0.013435	1111.5	48.7904																	449	0.004	0	-0.001	0.00141421
449	1.5635	0.0233345	1372.5	91.2168	0.928	0.0127279	1108	38.1838																	456	0.001	0	-0.004	0.00141421
456	1.563	0.0254558	1379.5	84.1457	0.927	0.0127279	1108	41.0122																	463	0.008	0	0.0035	0.00212132
463	1.5625	0.026163	1375	87.6812	0.9265	0.013435	1105.5	34.6482																	470	0.008	0	0.003	0.00141421
470	1.5645	0.0275772	1381	90.5097	0.9285	0.013435	1111.5	41.7193																	477	0.0075	0.000707107	0.0025	0.00212132
477	1.565	0.0254558	1396	93.3381	0.929	0.0141421	1130	49.4975																	484	0.0065	0.000707107	0.001	0.00141421
484	1.565	0.0268701	1384	86.267	0.929	0.0141421	1125	52.3259																	491	0.0085	0.000707107	0.0035	0.00212132
491	1.5655	0.0275772	1407.5	79.9031	0.9295	0.0148492	1131	41.0122																	498	0.003	0	-0.002	0.00141421
498	1.566	0.0254558	1403.5	92.631	0.9295	0.0148492	1136.5	51.6188																	505	0.005	0	0.0005	0.00212132
505	1.5675	0.026163	1401	83.4386	0.93	0.0155563	1140.5	50.2046																	512	0.0065	0.000707107	0.0015	0.00212132
512	1.567	0.0268701	1414.5	95.4594	0.931	0.0155563	1141	42.4264																	519	0.0085	0.000707107	0.003	0.00141421
519	1.566	0.0268701	1404	96.1665	0.932	0.0169706	1136.5	41.7193																	526	0.003	0	-0.002	0.00141421
526	1.5685	0.026163	1409	80.6102	0.9325	0.0176777	1148.5	37.4767																	533	0.0015	0.000707107	-0.0035	0.00212132
533	1.5665	0.026163	1406	93.3381	0.9335	0.0190919	1148.5	40.3051																	540	-0.002	0	-0.0065	0.00212132
540	1.567	0.0254558	1412.5	88.3883	0.933	0.0183848	1153	33.9411																	547	-0.002	0	-0.0065	0.00212132
547	1.567	0.0254558	1416	91.9239	0.9335	0.0205061	1150	36.7696																	554	0.004	0	-0.0005	0.00212132
554	1.5695	0.0247487	1414	86.267	0.935	0.019799	1143	36.7696																	561	0.008	0	0.0035	0.00212132
561	1.5685	0.026163	1416.5	88.3883	0.9355	0.0190919	1162	21.2132																	568	0.008	0	0.003	0.00141421
568	1.5695	0.0247487	1410	82.0244	0.936	0.0183848	1160	19.799																	575	0.006	0	0.001	0.00141421
575	1.569	0.0254558	1421	90.5097	0.9365	0.0190919	1170.5	40.3051																	582	0.002	0	-0.0025	0.00212132
582	1.57	0.0254558	1434	94.7523	0.937	0.0183848	1166.5	43.1335																	589	0.008	0	0.0035	0.00212132
589	1.5695	0.026163	1422	91.9239	0.9365	0.0176777	1181.5	38.8909																	596	-0.001	0	-0.0055	0.00212132
596	1.569	0.0268701	1430.5	91.2168	0.9355	0.0190919	1172.5	37.4767																	603	0	0	-0.0045	0.00212132
603	1.57	0.0254558	1426.5	94.0452	0.935	0.0183848	1189	32.5269																	610	0.008	0	0.0035	0.00212132
610	1.569	0.0254558	1432.5	101.116	0.9345	0.0190919	1177.5	34.6482																	617	0.008	0	0.0035	0.00212132
617	1.57	0.0254558	1438.5	92.631	0.936	0.0183848	1187.5	44.5477																	624	-0.002	0	-0.0065	0.00212132
624	1.57	0.0254558	1436	94.7523	0.9355	0.0190919	1188	35.3553																	631	0.008	0	0.003	0.00141421
631	1.572	0.0268701	1444.5	86.9741	0.9375	0.0190919	1193.5	17.6777																	638	0.006	0	0.0015	0.00212132
638	1.571	0.0268701	1456	89.0955	0.9375	0.0205061	1198	36.7696																	645	0.0025	0.000707107	-0.0025	0.00212132
645	1.5705	0.026163	1446.5	91.2168	0.9375	0.0205061	1195	38.1838																	652	0.008	0	0.0035	0.00212132
652	1.571	0.0268701	1455.5	92.631	0.939	0.019799	1203.5	34.6482																	659	0.003	0	-0.0015	0.00212132
659	1.571	0.0268701	1453	104.652	0.9385	0.0205061	1207	42.4264																	666	0.007	0	0.0025	0.00212132
666	1.571	0.0268701	1461	90.5097	0.939	0.019799	1207.5	43.1335																	673	0.005	0	0.0005	0.00212132
673	1.5705	0.026163	1455	80.6102	0.939	0.019799	1212.5	44.5477																	680	0.006	0	0.001	0.00141421
680	1.5715	0.0275772	1460	79.196	0.9385	0.0205061	1214	46.669																	687	0.003	0	-0.002	0.00141421
687	1.571	0.0268701	1444.5	95.4594	0.938	0.0212132	1214.5	38.8909																	694	0.007	0	0.0025	0.00212132
694	1.5715	0.026163	1459	96.1665	0.939	0.019799	1222.5	31.8198																	701	0.005	0	0.0005	0.00212132
701	1.5725	0.026163	1457.5	92.631	0.939	0.019799	1224.5	36.0624																	708	0.004	0	-0.0005	0.00212132
708	1.5715	0.026163	1458.5	91.2168	0.9385	0.0205061	1235	46.669																	715	0.0085	0.000707107	0.003	0.00141421
715	1.573	0.0268701	1460	100.409	0.939	0.019799	1235.5	38.8909																	722	0.007	0	0.0025	0.00212132
722	1.5715	0.026163	1468.5	92.631	0.9375	0.0205061	1234	49.4975																	729	0.008	0	0.0035	0.00212132
729	1.5725	0.026163	1468.5	102.53	0.939	0.0183848	1244	31.1127																	736	0.005	0	0.0005	0.00212132
736	1.5725	0.026163	1473	103.238	0.938	0.019799	1246	29.6985																	743	0.0035	0.000707107	-0.002	0.00141421
743	1.573	0.0268701	1468	108.894	0.9385	0.0190919	1240	39.598																	750	0.0065	0.000707107	0.0015	0.00212132
750	1.5735	0.0275772	1484.5	101.116	0.939	0.0183848	1255	39.598																	757	0.009	0	0.003	0.00141421
757	1.5745	0.026163	1470	83.4386	0.939	0.0183848	1243.5	41.7193																	764	0.0025	0.000707107	-0.0025	0.00212132
764	1.573	0.0254558	1473.5	84.1457	0.9395	0.0176777	1255.5	44.5477																	771	0.0085	0.000707107	0.003	0.00141421
771	1.574	0.0268701	1477.5	98.2878	0.9395	0.0176777	1257	43.8406																	778	0.0005	0.000707107	-0.0045	0.00212132
778	1.5735	0.026163	1486.5	106.773	0.939	0.0169706	1262	39.598																	785	0	0	-0.0055	0.00212132
785	1.573	0.0254558	1491	94.7523	0.9385	0.0162635	1271	48.0833																	792	0.0095	0.000707107	0.004	0.00141421
792	1.5725	0.026163	1486.5	102.53	0.9385	0.0162635	1269.5	45.9619																	799	0.0095	0.000707107	0.004	0.00141421
799	1.5725	0.0247487	1495	103.238	0.938	0.0155563	1273.5	44.5477																	806	0.0085	0.000707107	0.003	0.00141421
806	1.5725	0.0247487	1492	97.5807	0.938	0.0169706	1271.5	48.7904																	813	0.0035	0.000707107	-0.002	0.00141421
813	1.573	0.0254558	1504	100.409	0.939	0.0155563	1279.5	40.3051																	820	0.0055	0.000707107	0.0005	0.00212132
820	1.573	0.0268701	1500	94.7523	0.939	0.0141421	1280.5	53.033																	827	0.0095	0.000707107	0.0035	0.00212132
827	1.573	0.0268701	1503.5	115.258	0.939	0.0141421	1286	43.8406																	834	0.0095	0.000707107	0.004	0.00141421
834	1.573	0.0254558	1511	98.9949	0.9395	0.0148492	1286.5	44.5477																	841	0.005	0	-0.0005	0.00212132
841	1.5715	0.0247487	1514.5	101.116	0.939	0.0141421	1289	45.2548																	848	0.0085	0.000707107	0.003	0.00141421
848	1.571	0.0240416	1508	106.066	0.9375	0.0148492	1293.5	44.5477																	855	0.0085	0.000707107	0.0035	0.00212132
855	1.5725	0.026163	1517.5	101.116	0.939	0.0141421	1303	57.9828																	862	0.0095	0.000707107	0.004	0.00141421
862	1.572	0.0254558	1510.5	111.016	0.939	0.0141421	1293.5	38.8909																	869	0.0085	0.000707107	0.0035	0.00212132
869	1.572	0.0254558	1514	115.966	0.938	0.0155563	1307	53.7401																	876	0.0075	0.000707107	0.002	0.00141421
876	1.5715	0.0247487	1516	111.723	0.9395	0.0148492	1295	43.8406																	883	0.0095	0.000707107	0.004	0.00141421
883	1.571	0.0240416	1528	113.137	0.9395	0.0148492	1310.5	48.7904																	890	0.0095	0.000707107	0.0045	0.00212132
890	1.5705	0.0247487	1529	127.279	0.9395	0.0148492	1307.5	36.0624																	897	0.0095	0.000707107	0.004	0.00141421
897	1.571	0.0226274	1533.5	108.187	0.94	0.0155563	1331	50.9117																	904	0.0085	0.000707107	0.0035	0.00212132
904	1.5705	0.0219203	1531	125.865	0.9395	0.0162635	1311.5	41.7193																	911	0.0095	0.000707107	0.0045	0.00212132
911	1.571	0.0226274	1534	118.794	0.94	0.0155563	1315.5	54.4472																	918	0.0085	0.000707107	0.003	0.00141421
918	1.568	0.0226274	1540	114.551	0.938	0.0155563	1320.5	48.7904																	925	0.0095	0.000707107	0.0045	0.00212132
925	1.57	0.0226274	1540	130.108	0.9405	0.0162635	1328.5	48.7904																	932	0.0085	0.000707107	0.0035	0.00212132
932	1.5685	0.0219203	1535.5	113.844	0.94	0.0169706	1323.5	55.8614																	939	0.0085	0.000707107	0.0035	0.00212132
939	1.5695	0.0219203	1542	124.451	0.94	0.0169706	1317	50.9117																	946	0.0085	0.000707107	0.0035	0.00212132
946	1.569	0.0212132	1543.5	125.158	0.9395	0.0162635	1332	46.669																	953	0.0095	0.000707107	0.004	0.00141421
953	1.5675	0.0205061	1540	127.279	0.9385	0.0162635	1326.5	44.5477																	960	0.0085	0.000707107	0.0035	0.00212132
960	1.569	0.0212132	1542	128.693	0.94	0.0155563	1342	43.8406																	967	0.0085	0.000707107	0.003	0.00141421
967	1.569	0.0212132	1542	134.35	0.9395	0.0162635	1335	42.4264																	974	0.0065	0.000707107	0.0015	0.00212132
974	1.568	0.0226274	1535	142.836	0.939	0.0155563	1327.5	41.7193																	981	0.0075	0.000707107	0.0025	0.00212132
981	1.569	0.0212132	1542	125.865	0.939	0.0169706	1338	42.4264																	988	0.0085	0.000707107	0.003	0.00141421
988	1.5685	0.0219203	1541.5	125.158	0.939	0.0169706	1333	53.7401																	995	0.0045	0.000707107	-0.0005	0.00212132
995	1.569	0.0226274	1537	128.693	0.94	0.0155563	1337	48.0833																	1002	0.0085	0.000707107	0.0035	0.00212132
1002	1.568	0.0212132	1544.5	123.744	0.9395	0.0162635	1332	52.3259																	1009	0.0035	0.000707107	-0.002	0.00141421
1009	1.5685	0.0219203	1551	125.865	0.9395	0.0162635	1350	46.669																	1016	0.0075	0.000707107	0.0025	0.00212132
1016	1.5695	0.0219203	1548	118.794	0.9395	0.0162635	1347	43.8406																	1023	0.0065	0.000707107	0.0015	0.00212132
1023	1.57	0.0240416	1537	121.622	0.94	0.0155563	1343.5	44.5477																	1030	0.0085	0.000707107	0.003	0.00141421
1030	1.569	0.0240416	1539.5	125.158	0.9385	0.0162635	1344.5	43.1335																	1037	0.0025	0.000707107	-0.003	0.00141421
1037	1.568	0.0240416	1538	101.823	0.938	0.0155563	1350	43.8406																	1044	0.0095	0.000707107	0.004	0.00141421
1044	1.5685	0.0247487	1542	113.137	0.9385	0.0162635	1353	48.0833																	1051	0.0065	0.000707107	0.001	0.00141421
1051	1.5685	0.026163	1540	107.48	0.9375	0.0176777	1351.5	61.5183																	1058	0.0045	0.000707107	-0.001	0.00141421
1058	1.5695	0.0247487	1548	117.38	0.9395	0.0162635	1367	46.669																	1065	0.0035	0.000707107	-0.0015	0.00212132
1065	1.5695	0.0247487	1542.5	116.673	0.939	0.0169706	1360.5	54.4472																	1072	0.0095	0.000707107	0.004	0.00141421
1072	1.567	0.0240416	1541.5	113.844	0.9375	0.0162635	1354.5	43.1335																	1079	0.0025	0.000707107	-0.0025	0.00212132
1079	1.5685	0.0247487	1544	108.894	0.9395	0.0162635	1355	55.1543																	1086	0.0085	0.000707107	0.0035	0.00212132
1086	1.568	0.0240416	1545	110.309	0.9365	0.0162635	1367.5	41.7193																	1093	0.0045	0.000707107	-0.001	0.00141421
1093	1.568	0.0240416	1550	117.38	0.9375	0.0162635	1371.5	30.4056																	1100	0.0085	0.000707107	0.003	0.00141421
1100	1.5685	0.0233345	1551	115.966	0.9385	0.0162635	1371.5	43.1335																	1107	0.0095	0.000707107	0.0045	0.00212132
1107	1.5695	0.0247487	1559	107.48	0.9395	0.0162635	1376	42.4264																	1114	0.0055	0.000707107	0.0005	0.00212132
1114	1.5685	0.0219203	1550.5	113.844	0.9405	0.0162635	1375.5	50.2046																	1121	0.0065	0.000707107	0.0015	0.00212132
1121	1.5685	0.0233345	1561	106.066	0.94	0.0169706	1370.5	33.234																	1128	0.009	0	0.004	0.00141421
1128	1.5665	0.0219203	1557.5	119.501	0.938	0.0169706	1384.5	47.3762																	1135	0.0065	0.000707107	0.001	0.00141421
1135	1.5675	0.0219203	1564	118.794	0.939	0.0169706	1376.5	43.1335																	1142	0.0055	0.000707107	0.0005	0.00212132
1142	1.5665	0.0219203	1561	121.622	0.9395	0.0162635	1377.5	47.3762																	1149	0.0085	0.000707107	0.0035	0.00212132
1149	1.566	0.0226274	1563	124.451	0.9375	0.0176777	1395	36.7696																	1156	0.0085	0.000707107	0.003	0.00141421
1156	1.5675	0.0233345	1572.5	115.258	0.9385	0.0162635	1395	43.8406																	1163	0.0085	0.000707107	0.0035	0.00212132
1163	1.567	0.0226274	1563	117.38	0.9395	0.0148492	1389.5	41.7193																	1170	0.0095	0.000707107	0.004	0.00141421
1170	1.5665	0.0233345	1559	114.551	0.937	0.0155563	1382.5	54.4472																	1177	-0.0015	0.000707107	-0.007	0.00141421
1177	1.568	0.0226274	1554	104.652	0.9385	0.0162635	1394.5	30.4056																	1184	0.0085	0.000707107	0.003	0.00141421
1184	1.5675	0.0233345	1565.5	108.187	0.9385	0.0162635	1399	52.3259																	1191	0.0055	0.000707107	0	0.00141421
1191	1.568	0.0226274	1580.5	102.53	0.938	0.0169706	1415	46.669																	1198	0.0085	0.000707107	0.003	0.00141421
1198	1.5685	0.0233345	1569	108.894	0.9385	0.0162635	1407	36.7696																	1205	0.0055	0.000707107	0	0.00141421
1205	1.567	0.0226274	1578.5	105.359	0.937	0.0169706	1415.5	37.4767																	1212	0.0075	0.000707107	0.002	0.00141421
1212	1.5665	0.0233345	1573	121.622	0.9375	0.0162635	1405.5	36.0624																	1219	0.0055	0.000707107	0	0.00141421
1219	1.566	0.0226274	1571.5	116.673	0.9375	0.0176777	1416.5	48.7904																	1226	0.0035	0.000707107	-0.002	0.00141421
1226	1.567	0.0226274	1575	125.865	0.939	0.0169706	1412	38.1838																	1233	0.0065	0.000707107	0.001	0.00141421
1233	1.565	0.0226274	1567.5	115.258	0.937	0.0183848	1412.5	27.5772																	1240	-0.0005	0.000707107	-0.006	0.00141421
1240	1.566	0.0212132	1573.5	112.43	0.9385	0.0162635	1403	31.1127																	1247	-0.003	0	-0.008	0.00141421
1247	1.5635	0.0219203	1582	115.966	0.936	0.0169706	1414	33.9411																	1254	0.005	0	0.0005	0.00212132
1254	1.564	0.0212132	1567	108.894	0.9365	0.0176777	1411	35.3553																	1261	0.006	0	0.001	0.00141421
1261	1.5635	0.0219203	1583.5	108.187	0.936	0.0169706	1415.5	36.0624																	1268	0.003	0	-0.002	0.00141421
1268	1.5625	0.0219203	1572.5	111.016	0.934	0.0169706	1419	46.669																	1275	0.009	0	0.004	0.00141421
1275	1.564	0.0212132	1585	121.622	0.9345	0.0148492	1428	38.1838																	1282	0.007	0	0.002	0.00141421
1282	1.564	0.0212132	1576.5	102.53	0.9345	0.0148492	1421	38.1838																	1289	0.0095	0.000707107	0.004	0.00141421
1289	1.5655	0.0219203	1575	106.066	0.9335	0.0148492	1434	25.4558																	1296	0.0095	0.000707107	0.0045	0.00212132
1296	1.563	0.0226274	1577.5	120.915	0.933	0.0141421	1431	33.9411																	1303	0.0075	0.000707107	0.002	0.00141421
1303	1.565	0.0212132	1569.5	116.673	0.934	0.0141421	1431	59.397																	1310	0.001	0	-0.004	0.00141421
1310	1.563	0.0240416	1586	124.451	0.932	0.0141421	1449	48.0833																	1317	-0.001	0	-0.006	0.00141421
1317	1.566	0.0226274	1597	120.208	0.935	0.0141421	1453	56.5685																	1324	0.006	0	0.001	0.00141421
1324	1.565	0.0240416	1594	115.966	0.9335	0.013435	1446	53.7401																	1331	0.007	0	0.002	0.00141421
1331	1.5645	0.0219203	1587	107.48	0.932	0.0141421	1452.5	51.6188																	1338	0.0035	0.000707107	-0.0015	0.00212132
1338	1.5635	0.0219203	1583	104.652	0.932	0.0141421	1449	69.2965																	1345	0.0045	0.000707107	-0.0005	0.00212132
1345	1.5645	0.0233345	1587.5	120.915	0.9325	0.013435	1455	63.6396																	1352	-0.001	0	-0.006	0.00141421
1352	1.564	0.0212132	1580.5	105.359	0.933	0.0127279	1457	50.9117																	1359	0.006	0	0.001	0.00141421
1359	1.5635	0.0219203	1603	121.622	0.932	0.0127279	1463	57.9828																	1366	0.004	0	-0.001	0.00141421
1366	1.5635	0.0219203	1591.5	112.43	0.9315	0.013435	1481.5	55.8614																	1373	0.006	0	0.001	0.00141421
1373	1.564	0.0226274	1592	121.622	0.932	0.0127279	1479	83.4386																	1380	0.006	0	0.0015	0.00212132
1380	1.565	0.0226274	1601	118.794	0.9325	0.013435	1486.5	72.832																	1387	0.0075	0.000707107	0.002	0.00141421
1387	1.564	0.0240416	1597	115.966	0.9305	0.0120208	1483	77.7817																	1394	0.007	0	0.002	0.00141421
1394	1.568	0.0268701	1586	101.823	0.9305	0.0120208	1485.5	67.1751																	1401	0.002	0	-0.003	0.00141421
1401	1.5665	0.026163	1588	100.409	0.9315	0.0120208	1481.5	71.4178																	1408	0.003	0	-0.002	0.00141421
1408	1.565	0.0254558	1595	114.551	0.9295	0.0120208	1497	80.6102																	1415	0.007	0	0.002	0.00141421
1415	1.565	0.0254558	1579	98.9949	0.93	0.0113137	1498	80.6102																	1422	-0.0005	0.000707107	-0.0055	0.00212132
1422	1.565	0.0240416	1603.5	106.773	0.931	0.0113137	1507	90.5097																	1429	0.008	0	0.003	0.00141421
1429	1.5655	0.0247487	1586	100.409	0.93	0.0113137	1508	98.9949																	1436	0.008	0	0.003	0.00141421
1436	1.5655	0.0275772	1590	103.238	0.9295	0.0120208	1518.5	103.945
