# Supplementary material for: Polyphosphate discriminates protein conformational ensembles more efficiently than DNA promoting diverse assembly and maturation behaviors
Source: eLife. 2025 Jul 14;14:RP105461. doi: 10.7554/eLife.105461 (PMC12259020; doi:10.7554/eLife.105461)
Supplement: Source data 2. [file elife-105461-data2.xlsx]

## Sheet: Figure 3—figure supplement 1
OD (350nm) and Fluorescence intensity as a function of time
	WT		DM		P33A
Time(min)	OD 350 nm	ThT flu	OD 350 nm	ThT flu	OD 350 nm	ThT flu
1	0.008	-1	0.005	9	0.064	-4
8	0.007	3	0.003	5	0.06	7
15	0.005	-9	0.002	-12	0.059	-2
22	0.002	-12	-0.001	-20	0.059	3
29	-0.001	-4	-0.004	-17	0.06	-11
36	0.002	-2	-0.001	-2	0.059	-8
43	0.003	-6	0	-16	0.061	-13
50	0.004	1	0	6	0.061	-2
57	0.004	-1	0	-11	0.062	-6
64	0.004	-9	0.001	1	0.061	1
71	0.005	-1	0.001	-6	0.061	-2
78	0.004	-5	0.001	-3	0.061	-4
85	0.005	-14	0.001	-13	0.062	4
92	0.004	-14	0	-13	0.062	-1
99	0.004	4	0	9	0.061	-1
106	0.004	0	0	-8	0.062	-5
113	0.004	2	0	11	0.062	-2
120	0.005	-5	0.001	7	0.063	0
127	0.004	-6	0	-3	0.063	-5
134	0.004	-11	0	-6	0.062	-2
141	0.004	0	0	-10	0.063	-4
148	0.004	-13	0	-12	0.064	3
155	0.004	-4	0	2	0.064	1
162	0.004	-6	0	-8	0.065	4
169	0.004	4	0	6	0.063	-8
176	0.004	-7	0	-9	0.064	-7
183	0.004	-3	0	-10	0.064	-4
190	0.004	-12	0	-11	0.064	1
197	0.004	-3	0	-4	0.065	9
204	0.004	-1	0	2	0.064	-5
211	0.004	-10	0	-14	0.064	-8
218	0.004	-6	0	-6	0.064	-11
225	0.004	0	0	-5	0.065	0
232	0.004	-8	0	3	0.065	-3
239	0.004	-7	0	-4	0.065	-8
246	0.005	5	0.001	4	0.065	2
253	0.004	7	0	1	0.066	1
260	0.004	1	0	-8	0.065	1
267	0.005	-1	0.001	-8	0.065	-6
274	0.005	-6	0.001	-14	0.067	1
281	0.005	-8	0.001	-8	0.067	3
288	0.005	-1	0.001	-4	0.067	-1
295	0.005	-3	0.001	-5	0.067	-2
302	0.005	-3	0.001	-1	0.067	-4
309	0.005	-13	0.001	-10	0.066	1
316	0.005	-16	0.001	-8	0.068	-4
323	0.005	0	0.001	13	0.066	7
330	0.005	-9	0.001	-4	0.066	0
337	0.005	-9	0.001	3	0.067	-9
344	0.005	5	0.001	-5	0.068	3
351	0.005	-2	0.001	-2	0.067	-4
358	0.005	3	0.001	-9	0.067	0
365	0.005	-2	0.001	-1	0.066	-3
372	0.005	4	0.001	-4	0.066	0
379	0.005	-10	0.001	-8	0.067	-3
386	0.005	-4	0.001	-5	0.067	-1
393	0.005	-1	0.001	-2	0.067	5
400	0.005	-7	0.001	5	0.067	4
407	0.005	-11	0.001	-14	0.067	-4
414	0.004	4	0	5	0.067	-17
421	0.005	-4	0.001	-5	0.066	-7
428	0.004	7	0	11	0.067	2
435	0.004	-1	0	10	0.069	-4
442	0.004	8	0	8	0.068	-6
449	0.004	5	0	-6	0.068	3
456	0.004	-4	0	-2	0.067	0
463	0.005	-1	0.001	3	0.067	-7
470	0.005	-18	0.001	-5	0.068	4
477	0.005	-11	0.001	-8	0.068	-5
484	0.005	3	0.001	-5	0.068	0
491	0.005	-3	0.001	6	0.067	5
498	0.005	1	0.001	0	0.068	-2
505	0.005	-12	0.001	-9	0.068	-6
512	0.005	-4	0.001	-8	0.068	-1
519	0.005	-2	0.001	0	0.068	9
526	0.005	5	0.001	5	0.068	-15
533	0.005	-13	0.002	-16	0.068	-1
540	0.005	-4	0.001	-2	0.067	1
547	0.005	0	0.001	1	0.069	-3
554	0.005	3	0.001	-2	0.069	-7
561	0.005	0	0.001	1	0.069	-2
568	0.005	-8	0.001	1	0.068	2
575	0.005	-9	0.001	-9	0.069	2
582	0.005	-3	0.001	-7	0.068	-17
589	0.005	-5	0.001	-4	0.069	-10
596	0.005	-12	0.001	-14	0.069	-5
603	0.005	-15	0.002	-12	0.068	1
610	0.005	-4	0.001	-15	0.069	-1
617	0.005	0	0.001	3	0.069	2
624	0.005	-3	0.001	-3	0.07	1
631	0.005	-12	0.001	-7	0.069	-16
638	0.004	8	0	5	0.069	-4
645	0.004	2	0	-1	0.069	1
652	0.005	-1	0.001	-3	0.068	0
659	0.005	5	0.001	-4	0.068	-3
666	0.004	-4	0	-9	0.069	-5
673	0.004	-1	0	-1	0.069	-2
680	0.005	-7	0.001	4	0.07	3
687	0.006	-12	0.001	-6	0.068	0
694	0.005	-10	0.001	-7	0.069	-4
701	0.005	6	0.001	-8	0.07	-4
708	0.006	3	0.001	-5	0.07	-5
715	0.005	-3	0.001	-3	0.068	1
722	0.006	5	0.001	-5	0.07	12
729	0.005	-3	0.001	-4	0.07	2
736	0.006	-3	0.001	-7	0.069	8
743	0.006	-8	0.001	-17	0.07	1
750	0.006	-15	0.001	-9	0.069	7
757	0.006	-7	0.001	-4	0.069	-11
764	0.006	-8	0.001	-11	0.07	1
771	0.006	-10	0.001	-7	0.069	-2
778	0.006	-8	0.001	-11	0.07	-13
785	0.005	-9	0	-15	0.069	6
792	0.006	-5	0.001	2	0.07	-9
799	0.006	0	0.001	-10	0.072	2
806	0.006	-9	0.001	-3	0.071	1
813	0.006	8	0.002	1	0.07	0
820	0.006	3	0.002	-2	0.069	-8
827	0.006	-7	0.001	-5	0.07	13
834	0.006	-6	0.001	-14	0.07	3
841	0.006	-8	0.001	-16	0.071	3
848	0.006	-8	0.001	-12	0.07	-8
855	0.006	-2	0.001	-10	0.069	3
862	0.006	-9	0.001	-8	0.07	-2
869	0.006	6	0.001	5	0.07	-3
876	0.006	1	0.001	2	0.071	-2
883	0.006	-1	0.001	-11	0.069	-3
890	0.006	2	0.001	2	0.069	-1
897	0.006	-2	0.001	-5	0.069	7
904	0.006	10	0.001	6	0.071	-1
911	0.006	4	0.002	5	0.069	1
918	0.006	-1	0.002	-5	0.069	-1
925	0.006	0	0.002	-9	0.071	6
932	0.006	-13	0.002	-20	0.07	-2
939	0.006	1	0.002	2	0.07	-9
946	0.006	-14	0.002	-9	0.071	4
953	0.006	0	0.002	-6	0.07	-2
960	0.006	-7	0.001	4	0.069	-4
967	0.006	-17	0.002	-19	0.07	2
974	0.006	5	0.002	2	0.071	3
981	0.006	1	0.002	2	0.071	-4
988	0.006	8	0.001	6	0.07	-5
995	0.006	-6	0.001	-2	0.07	3
1002	0.006	-5	0.002	-6	0.068	-1
1009	0.006	-9	0.002	-3	0.07	-2
1016	0.006	-3	0.002	-3	0.07	2
1023	0.006	3	0.002	-5	0.07	7
1030	0.006	-11	0.002	-14	0.071	-14
1037	0.006	0	0.002	3	0.07	-15
1044	0.006	2	0.002	4	0.072	-6
1051	0.006	-11	0.002	-5	0.07	-3
1058	0.006	-5	0.001	-6	0.071	-5
1065	0.006	0	0.001	-1	0.071	-8
1072	0.006	-5	0.002	-5	0.071	-2
1079	0.006	0	0.002	5	0.07	0
1086	0.006	-1	0.002	-8	0.071	-9
1093	0.006	-1	0.001	-1	0.07	-13
1100	0.006	-9	0.002	-15	0.071	-7
1107	0.006	-5	0.002	0	0.069	-6
1114	0.006	1	0.002	1	0.072	0
1121	0.006	0	0.002	7	0.071	1
1128	0.006	6	0.002	4	0.07	-7
1135	0.006	-2	0.002	-5	0.071	-4
1142	0.006	0	0.002	-3	0.07	-8
1149	0.006	1	0.001	-5	0.071	-2
1156	0.006	-6	0.002	-9	0.07	3
1163	0.006	-6	0.002	-2	0.071	2
1170	0.006	0	0.002	0	0.069	-20
1177	0.006	-5	0.002	-10	0.069	-2
1184	0.006	0	0.002	-1	0.072	7
1191	0.005	-6	0.001	-4	0.071	12
1198	0.006	-8	0.002	-6	0.07	6
1205	0.006	8	0.002	7	0.07	7
1212	0.005	-7	0.001	-6	0.07	-6
1219	0.006	2	0.002	-2	0.07	-5
1226	0.006	-2	0.002	-6	0.071	0
1233	0.005	-13	0.001	0	0.072	-4
1240	0.005	6	0.001	3	0.071	4
1247	0.006	-16	0.002	-16	0.071	6
1254	0.006	-7	0.002	-12	0.071	-6
1261	0.006	-4	0.002	-5	0.071	-4
1268	0.006	-1	0.002	-6	0.071	-3
1275	0.006	-5	0.002	-8	0.071	-3
1282	0.006	6	0.002	7	0.07	-5
1289	0.006	-2	0.002	-5	0.071	-4
1296	0.006	4	0.002	-3	0.071	1
1303	0.006	0	0.002	-7	0.072	-3
1310	0.006	-4	0.002	-9	0.072	-7
1317	0.006	-2	0.002	2	0.07	-4
1324	0.006	3	0.002	-3	0.07	-7
1331	0.006	-10	0.002	-11	0.071	1
1338	0.006	1	0.002	4	0.072	-7
1345	0.005	-8	0.001	-13	0.072	-3
1352	0.005	-6	0.001	3	0.07	-7
1359	0.005	-8	0.001	-5	0.071	7
1366	0.005	-7	0.001	-5	0.071	3
1373	0.005	-6	0.001	2	0.071	4
1380	0.005	-4	0.001	3	0.07	-2
1387	0.005	-9	0.001	-8	0.07	-3
1394	0.005	-7	0.001	-4	0.073	6
1401	0.005	-12	0.001	-10	0.072	-2
1408	0.005	-9	0.001	-10	0.072	0
1415	0.005	3	0.001	-5	0.072	-3
1422	0.005	-5	0.001	0	0.071	-2
1429	0.005	6	0.001	-4	0.071	-13
1436	0.005	-1	0.001	-5	0.07	6

## Sheet: Figure 5—figure supplement 1
OD (350nm) as a function of time (panel S3A)						Droplet size distribution at different time points (panel S3B and S3C)
Time(min)	DM OD 350 nm	Error	P33A OD 350 nm	Error		Length of major axis (µM)	Frequency of DM droplets @0 min	Frequency of DM droplets @30 min	Frequency of DM droplets @60 min	Frequency of P33A droplets @0 min	Frequency of P33A droplets @30 min	Frequency of P33A droplets @60 min
1	0.224	0.019799	0.2125	0.0346482		0	0	0	0	0	0	0
8	0.217	0.0311127	0.146	0.0183848		0.6	301	49	17	184	36	23
15	0.1855	0.00636396	0.12	0.0183848		1.2	494	127	41	347	93	44
22	0.1595	0.00919239	0.1325	0.0176777		1.8	379	172	79	238	131	66
29	0.1335	0.013435	0.1225	0.0106066		2.4	191	216	87	173	142	91
36	0.111	0.00848528	0.1205	0.0162635		3	106	173	107	90	143	115
43	0.072	0.00848528	0.1195	0.0190919		3.6	46	126	97	32	141	111
50	0.0375	0.00494975	0.1175	0.0417193		4.2	20	76	62	19	74	124
57	0.015	0.00989949	0.1115	0.0388909		4.8	11	43	41	13	52	68
64	0.0125	0.013435	0.1065	0.033234		5.4	21	30	18	11	27	44
71	0.0165	0.00777817	0.1035	0.0346482		6	6	15	15	3	10	24
78	0.0155	0.00919239	0.111	0.0254558		6.6	5	9	5	2	11	15
85	0.016	0.00848528	0.1165	0.0190919		7.2	2	4	3	1	3	7
92	0.016	0.00848528	0.1285	0.0106066		7.8	5	6	9	2	11	18
99	0.0155	0.00777817	0.135	0.00424264
106	0.015	0.00848528	0.1355	0.0120208
113	0.015	0.00848528	0.142	0.0127279
120	0.014	0.00848528	0.141	0.0226274
127	0.014	0.00848528	0.1425	0.0275772
134	0.014	0.00848528	0.139	0.0311127
141	0.0135	0.00777817	0.13	0.0325269
148	0.0135	0.00777817	0.1265	0.0403051
155	0.0125	0.00777817	0.1185	0.0459619
162	0.012	0.00848528	0.113	0.0551543
169	0.0125	0.00777817	0.103	0.0551543
176	0.0115	0.00777817	0.095	0.0537401
183	0.0115	0.00777817	0.0865	0.0459619
190	0.0115	0.00777817	0.0765	0.0360624
197	0.011	0.00707107	0.068	0.0268701
204	0.011	0.00707107	0.0595	0.0190919
211	0.0105	0.00777817	0.0515	0.0106066
218	0.01	0.00707107	0.047	0.00565685
225	0.01	0.00707107	0.043	0.00282843
232	0.01	0.00707107	0.041	0.00282843
239	0.01	0.00707107	0.0385	0.00353553
246	0.01	0.00707107	0.038	0.00141421
253	0.0095	0.00636396	0.037	0
260	0.0095	0.00636396	0.0345	0.000707107
267	0.009	0.00707107	0.0335	0.000707107
274	0.009	0.00707107	0.031	0
281	0.0085	0.00636396	0.0305	0.000707107
288	0.008	0.00707107	0.03	0
295	0.0085	0.00636396	0.028	0
302	0.0085	0.00636396	0.0265	0.000707107
309	0.0075	0.00636396	0.026	0
316	0.0075	0.00636396	0.0255	0.000707107
323	0.008	0.00565685	0.0235	0.000707107
330	0.0075	0.00636396	0.0225	0.000707107
337	0.0065	0.00636396	0.0215	0.000707107
344	0.0075	0.00636396	0.02	0.00141421
351	0.007	0.00565685	0.0195	0.00212132
358	0.007	0.00565685	0.019	0.00141421
365	0.006	0.00565685	0.0185	0.00212132
372	0.007	0.00565685	0.0175	0.00212132
379	0.0065	0.00636396	0.017	0.00282843
386	0.006	0.00565685	0.0165	0.00212132
393	0.006	0.00565685	0.016	0.00282843
400	0.006	0.00565685	0.0155	0.00212132
407	0.0065	0.00636396	0.0145	0.00212132
414	0.006	0.00565685	0.014	0.00282843
421	0.006	0.00565685	0.014	0.00282843
428	0.006	0.00565685	0.0135	0.00353553
435	0.006	0.00565685	0.013	0.00282843
442	0.0055	0.00494975	0.013	0.00282843
449	0.0055	0.00494975	0.0125	0.00353553
456	0.0045	0.00494975	0.012	0.00282843
463	0.0055	0.00494975	0.012	0.00282843
470	0.0045	0.00494975	0.0115	0.00353553
477	0.0045	0.00494975	0.0115	0.00353553
484	0.005	0.00565685	0.011	0.00282843
491	0.0045	0.00494975	0.011	0.00282843
498	0.005	0.00565685	0.0105	0.00353553
505	0.0035	0.00494975	0.0105	0.00353553
512	0.0035	0.00494975	0.0095	0.00353553
519	0.0045	0.00494975	0.0105	0.00353553
526	0.0045	0.00494975	0.0105	0.00353553
533	0.0035	0.00494975	0.0095	0.00353553
540	0.004	0.00424264	0.009	0.00424264
547	0.0045	0.00494975	0.009	0.00424264
554	0.004	0.00424264	0.0095	0.00353553
561	0.004	0.00424264	0.0085	0.00353553
568	0.003	0.00424264	0.0085	0.00353553
575	0.004	0.00424264	0.0085	0.00353553
582	0.003	0.00424264	0.0085	0.00353553
589	0.004	0.00424264	0.009	0.00424264
596	0.0035	0.00494975	0.0085	0.00353553
603	0.0035	0.00494975	0.008	0.00424264
610	0.0035	0.00494975	0.008	0.00424264
617	0.0045	0.00494975	0.008	0.00424264
624	0.0035	0.00494975	0.009	0.00424264
631	0.004	0.00424264	0.0085	0.00353553
638	0.0035	0.00494975	0.009	0.00424264
645	0.0035	0.00494975	0.0075	0.00353553
652	0.0035	0.00494975	0.0075	0.00353553
659	0.003	0.00424264	0.008	0.00424264
666	0.003	0.00424264	0.0075	0.00353553
673	0.002	0.00424264	0.0075	0.00353553
680	0.002	0.00424264	0.0075	0.00353553
687	0.003	0.00424264	0.0075	0.00353553
694	0.003	0.00424264	0.0085	0.00353553
701	0.003	0.00424264	0.0075	0.00353553
708	0.003	0.00424264	0.0075	0.00353553
715	0.003	0.00424264	0.007	0.00424264
722	0.003	0.00424264	0.007	0.00424264
729	0.003	0.00424264	0.0075	0.00353553
736	0.0035	0.00353553	0.007	0.00424264
743	0.003	0.00424264	0.007	0.00424264
750	0.002	0.00424264	0.007	0.00424264
757	0.003	0.00424264	0.007	0.00424264
764	0.0025	0.00353553	0.007	0.00424264
771	0.002	0.00424264	0.006	0.00424264
778	0.002	0.00424264	0.007	0.00424264
785	0.002	0.00424264	0.007	0.00424264
792	0.002	0.00424264	0.006	0.00424264
799	0.003	0.00424264	0.007	0.00424264
806	0.002	0.00424264	0.006	0.00424264
813	0.002	0.00424264	0.007	0.00424264
820	0.003	0.00424264	0.007	0.00424264
827	0.002	0.00424264	0.007	0.00424264
834	0.002	0.00424264	0.007	0.00424264
841	0.003	0.00424264	0.007	0.00424264
848	0.002	0.00424264	0.007	0.00424264
855	0.002	0.00424264	0.006	0.00424264
862	0.0015	0.00353553	0.006	0.00424264
869	0.0015	0.00353553	0.006	0.00424264
876	0.0015	0.00353553	0.007	0.00424264
883	0.0015	0.00353553	0.006	0.00424264
890	0.0015	0.00353553	0.007	0.00424264
897	0.0015	0.00353553	0.0065	0.00353553
904	0.0015	0.00353553	0.0065	0.00353553
911	0.0015	0.00353553	0.007	0.00424264
918	0.0015	0.00353553	0.0065	0.00353553
925	0.0015	0.00353553	0.005	0.00424264
932	0.0005	0.00353553	0.0065	0.00353553
939	0.0015	0.00353553	0.007	0.00424264
946	0.0015	0.00353553	0.007	0.00424264
953	0.0015	0.00353553	0.0055	0.00353553
960	0.0015	0.00353553	0.007	0.00424264
967	0.0015	0.00353553	0.006	0.00424264
974	0.0025	0.00353553	0.0055	0.00353553
981	0.0015	0.00353553	0.0065	0.00353553
988	0.0015	0.00353553	0.0055	0.00353553
995	0.0025	0.00353553	0.0055	0.00353553
1002	0.0005	0.00353553	0.005	0.00424264
1009	0.001	0.00424264	0.0065	0.00353553
1016	0.0015	0.00353553	0.0065	0.00353553
1023	0.001	0.00424264	0.0055	0.00353553
1030	0.0015	0.00353553	0.0065	0.00353553
1037	0.0015	0.00353553	0.0055	0.00353553
1044	0.0015	0.00353553	0.006	0.00424264
1051	0.0015	0.00353553	0.0065	0.00353553
1058	0.0015	0.00353553	0.0065	0.00353553
1065	0.0015	0.00353553	0.006	0.00424264
1072	0.002	0.00424264	0.0065	0.00353553
1079	0.0005	0.00353553	0.005	0.00424264
1086	0.0015	0.00353553	0.005	0.00424264
1093	0.0005	0.00353553	0.0045	0.00353553
1100	0.0005	0.00353553	0.0055	0.00353553
1107	0.002	0.00282843	0.0065	0.00353553
1114	0.001	0.00282843	0.006	0.00424264
1121	0.0005	0.00353553	0.006	0.00424264
1128	0.0005	0.00353553	0.006	0.00424264
1135	0.001	0.00424264	0.0065	0.00353553
1142	0.0005	0.00353553	0.006	0.00424264
1149	0.0005	0.00353553	0.005	0.00424264
1156	0.0005	0.00353553	0.006	0.00424264
1163	0.0005	0.00353553	0.0065	0.00353553
1170	0.002	0.00282843	0.006	0.00424264
1177	0.0015	0.00353553	0.0055	0.00353553
1184	0.0015	0.00353553	0.006	0.00424264
1191	0.0015	0.00353553	0.006	0.00424264
1198	0.0015	0.00353553	0.005	0.00424264
1205	0.0015	0.00353553	0.004	0.00424264
1212	0.0015	0.00353553	0.006	0.00424264
1219	0.0005	0.00353553	0.005	0.00424264
1226	0.0005	0.00353553	0.006	0.00424264
1233	0.0015	0.00353553	0.004	0.00424264
1240	0.0005	0.00353553	0.005	0.00424264
1247	0.0005	0.00353553	0.005	0.00424264
1254	0.0005	0.00353553	0.006	0.00424264
1261	0.0015	0.00353553	0.0055	0.00353553
1268	0.0005	0.00353553	0.005	0.00424264
1275	0.0005	0.00353553	0.005	0.00424264
1282	0.0005	0.00353553	0.005	0.00424264
1289	0.0005	0.00353553	0.0055	0.00494975
1296	0.0015	0.00353553	0.0065	0.00494975
1303	0.0005	0.00353553	0.005	0.00424264
1310	0.0005	0.00353553	0.005	0.00424264
1317	0.0005	0.00353553	0.005	0.00424264
1324	0.0005	0.00353553	0.005	0.00424264
1331	0.0015	0.00353553	0.005	0.00424264
1338	0.0005	0.00353553	0.0055	0.00494975
1345	0.0005	0.00353553	0.005	0.00424264
1352	0.0015	0.00353553	0.005	0.00424264
1359	0.0015	0.00353553	0.005	0.00424264
1366	0.0005	0.00353553	0.005	0.00424264
1373	0.0005	0.00353553	0.0055	0.00494975
1380	0.0015	0.00353553	0.005	0.00424264
1387	0.0015	0.00353553	0.005	0.00424264
1394	0.0005	0.00353553	0.005	0.00424264
1401	0.001	0.00282843	0.006	0.00424264
1408	0.0005	0.00353553	0.005	0.00424264
1415	0.0005	0.00353553	0.005	0.00424264
1422	0.0005	0.00353553	0.0055	0.00494975
1429	0.0005	0.00353553	0.006	0.00424264
1436	0	0.00282843	0.006	0.00424264

## Sheet: Figure 5—figure supplement 2
FRAP signal at different time points
WT@ 0min				WT@ 30min				WT@ 60min				DM@ 0min				DM@ 30min				DM@ 60min				P33A@ 0min				P33A@ 30min				P33A@ 60min					WT t-half @ 0min	WT t-half @ 30min	WT t-half @ 60min		DM t-half @ 0min	DM t-half @ 30min	DM t-half @ 60min		P33A t-half @ 0min	P33A t-half @ 30min	P33A t-half @ 60min
Time (sec)	Fractional Recovery	error	fit	Time (sec)	Fractional Recovery	error	fit	Time (sec)	Fractional Recovery	error	fit	Time (sec)	Fractional Recovery	error	fit	Time (sec)	Fractional Recovery	error	fit	Time (sec)	Fractional Recovery	error	fit	Time (sec)	Fractional Recovery	error	fit	Time (sec)	Fractional Recovery	error	fit	Time (sec)	Fractional Recovery	error	fit	t-half	6.65	8.42	15.93	t-half	6.63	5.1	4.44	t-half	1.66	3.41	5.87		Fractional Amplitude
0	1	0		0	1	0		0	1	0		0	1	0		0	1	0		0	1	0		0	1	0		0	1	0		0	1	0			4.68	5.99	13.39		6.92	8.8	2.72		3.01	3.32	3.66
0.33765	0.936631	0.0620961		0.47995	0.9849	0.108177		0.90776	0.9763	0.0310872		0.88452	0.957792	0.0879702		0.29105	0.991421	0.0902542		0.59718	1.04919	0.0822529		0.63895	1.00719	0.0606713		0.81587	1.00738	0.0396855		1.31	0.9924	0.0167684			3.9	9.57	11.6		6.9	5.57	10.13		3.47	4.91	4.39
1.08916	0	0	0.0213283	1.37975	0.0010349	0.00206981	-0.016	2.23539	0	0	-0.00913164	2.2969	0	0	0.0171903	1.06595	0	0	0.0192429	1.67823	0	0	-0.0178969	1.69776	0	0	0.019	2.11559	0	0	0.018496	3.13	0	0	0.0145162		6.63	7.63	9.84		5.34	5.56	7.68		2.95	3.54	5.76
1.42681	0.0892658	0.0508543	0.0756426	1.8597	0.066	0.0617847	0.054	3.14315	0.084	0.0152454	0.0675495	3.18142	0.1017	0.0548188	0.102672	1.357	0.0450183	0.0321086	0.0622636	2.27541	0.116211	0.0376194	0.0769913	2.33671	0.183157	0.023342	0.1582	2.93146	0.200393	0.0479006	0.18225	4.45	0.2095	0.0600342	0.192878	Average thalf	5.465	7.9025	12.69	Average thalf	6.4475	6.2575	6.2425	Average thalf	2.7725	3.795	4.92		Average Amp
1.76447	0.156914	0.0598456	0.124771	2.33965	0.1498	0.0363198	0.115	4.05091	0.1348	0.0128138	0.131361	4.06594	0.21915	0.0409596	0.178212	1.64805	0.0960713	0.0369996	0.102725	2.87259	0.18469	0.0190775	0.15678	2.97567	0.325861	0.0610614	0.2737	3.74733	0.343907	0.0759043	0.309356	5.76	0.3342	0.0593624	0.324896	Error	1.3937	1.5034	2.6012	Error	0.7501	1.7091	3.8782	Error	0.7772	0.7488	1.0765		Error
2.10212	0.186891	0.0595594	0.169256	2.8196	0.1722	0.0415491	0.1682	4.95868	0.1931	0.0193068	0.184603	4.95046	0.252697	0.0928055	0.245208	1.9391	0.171283	0.0369598	0.140788	3.46978	0.206672	0.0143703	0.224163	3.61462	0.407921	0.0579505	0.3695	4.5632	0.435476	0.0102291	0.408487	7.07	0.4277	0.0850444	0.424256
2.43977	0.228717	0.0484596	0.209587	3.29955	0.1986	0.0420388	0.2147	5.86644	0.239	0.0279147	0.229161	5.83498	0.255871	0.0555603	0.304853	2.23015	0.192404	0.0321558	0.176606	4.06696	0.31189	0.0696501	0.281344	4.25357	0.473341	0.0567743	0.4493	5.37907	0.468701	0.0373054	0.486256	8.38	0.5013	0.0999637	0.499766
2.77742	0.245891	0.0634521	0.246201	3.77949	0.2349	0.0433246	0.2556	6.77421	0.2735	0.018206	0.266586	6.7195	0.357321	0.0543676	0.358167	2.52119	0.228293	0.0780388	0.210319	4.66415	0.307825	0.042342	0.330135	4.89252	0.520741	0.0469318	0.5158	6.19493	0.585662	0.020262	0.547698	9.69	0.55	0.098462	0.557823
3.11507	0.314311	0.0532939	0.279487	4.25944	0.3195	0.0240883	0.2916	7.68197	0.2926	0.010702	0.29815	7.60402	0.445153	0.0737516	0.40602	2.81224	0.27222	0.0396805	0.242062	5.26133	0.375347	0.0385227	0.372017	5.53147	0.575123	0.0507684	0.5715	7.0108	0.605344	0.0820352	0.596656	11	0.6025	0.0706353	0.603074
3.45273	0.31341	0.0627626	0.309794	4.73939	0.3191	0.0269885	0.3235	8.58973	0.3247	0.0287537	0.324895	8.48854	0.45635	0.0715445	0.449155	3.10329	0.250715	0.0120634	0.271959	5.85851	0.413912	0.0528937	0.408207	6.17043	0.587267	0.0154987	0.6181	7.82667	0.63385	0.0524664	0.636053	12.31	0.6359	0.103484	0.6389
3.79038	0.375023	0.0543038	0.337433	5.21934	0.3376	0.0500113	0.3518	9.4975	0.3322	0.028246	0.34768	9.37306	0.519754	0.0377586	0.488209	3.39434	0.276657	0.0167237	0.300126	6.4557	0.441883	0.0811308	0.439701	6.80938	0.638505	0.064124	0.6574	8.64254	0.626179	0.0261665	0.668121	13.62	0.6448	0.101792	0.667758
4.12803	0.372705	0.0431579	0.362681	5.69929	0.3902	0.0330449	0.3771	10.4053	0.3541	0.0231349	0.367207	10.2576	0.517689	0.041015	0.523724	3.68539	0.336541	0.0724428	0.326674	7.05288	0.431309	0.0322921	0.467317	7.44833	0.679931	0.0959055	0.6906	9.45841	0.649985	0.0597748	0.69456	14.93	0.6899	0.116204	0.691438
4.46568	0.372183	0.0604544	0.385787	6.17923	0.4015	0.0486378	0.3997	11.313	0.3753	0.0319128	0.384054	11.1421	0.564352	0.0376162	0.556164	3.97643	0.341506	0.0401844	0.351702	7.65007	0.464146	0.0633936	0.491725	8.08728	0.713192	0.0335726	0.7188	10.2743	0.68924	0.107383	0.716667	16.25	0.7093	0.100352	0.711382
4.80333	0.372184	0.0761886	0.406975	6.65918	0.4209	0.0718435	0.4202	12.2208	0.4029	0.0406493	0.398696	12.0266	0.549871	0.068047	0.585927	4.26748	0.394981	0.0211235	0.37531	8.24725	0.510899	0.0445084	0.513475	8.72623	0.70807	0.0577051	0.7428	11.0901	0.704055	0.0494782	0.735429	17.56	0.7298	0.0868849	0.728243
5.14099	0.431118	0.0507084	0.426442	7.13913	0.4218	0.0552856	0.4387	13.1285	0.3953	0.0270619	0.411521	12.9111	0.632148	0.057135	0.613352	4.55853	0.392702	0.0399991	0.397585	8.84443	0.498015	0.056203	0.533019	9.36519	0.719819	0.049502	0.7634	11.906	0.745887	0.0733821	0.751602	18.87	0.7387	0.0787381	0.74288
5.47864	0.457029	0.0814642	0.444366	7.61908	0.4348	0.0766839	0.4555	14.0363	0.4111	0.0264744	0.422849	13.7957	0.598105	0.0689827	0.638732	4.84958	0.429587	0.023788	0.418611	9.44162	0.526936	0.0586737	0.550726	10.0041	0.782626	0.0754126	0.7812	12.7219	0.758501	0.0576554	0.765761	20.18	0.7516	0.0916018	0.7558
5.81629	0.498958	0.0711175	0.460905	8.09903	0.4498	0.0353846	0.471	14.9441	0.4293	0.0531032	0.432941	14.6802	0.653996	0.0928689	0.662316	5.14063	0.43107	0.0636732	0.438468	10.0388	0.545043	0.109559	0.5669	10.6431	0.764608	0.0556316	0.7966	13.5378	0.752113	0.0446139	0.778345	21.49	0.7686	0.0792477	0.767376
6.15394	0.51475	0.090329	0.476202	8.57897	0.4666	0.0687601	0.4852	15.8519	0.4265	0.0725312	0.442015	15.5647	0.655568	0.0510399	0.684318	5.43167	0.505618	0.0613553	0.457228	10.636	0.564144	0.109146	0.581792	11.282	0.747836	0.0430211	0.8101	14.3536	0.795299	0.139048	0.789689	22.8	0.7727	0.0876396	0.777882
6.49159	0.455655	0.0330837	0.490384	9.05892	0.5048	0.0219983	0.4983	16.7596	0.4245	0.0322117	0.450245	16.4492	0.684952	0.0188745	0.704923	5.72272	0.51024	0.0701888	0.474961	11.2332	0.610355	0.0570051	0.595604	11.921	0.764312	0.055033	0.822	15.1695	0.807708	0.0810118	0.800052	24.11	0.7817	0.070216	0.787523
6.82925	0.506053	0.080475	0.503564	9.53887	0.508	0.0774402	0.5105	17.6674	0.46	0.0587699	0.457778	17.3337	0.737665	0.045933	0.724287	6.01377	0.516649	0.0330382	0.491732	11.8303	0.573508	0.0624574	0.608506	12.56	0.813807	0.0357827	0.8325	15.9854	0.824788	0.10103	0.809628	25.42	0.8093	0.0609074	0.796449
7.1669	0.52699	0.0977342	0.515842	10.0188	0.4887	0.034531	0.522	18.5751	0.4724	0.0335678	0.464732	18.2183	0.737367	0.0437836	0.742548	6.30482	0.540498	0.0659421	0.507601	12.4275	0.59353	0.0911726	0.620636	13.1989	0.844097	0.0627176	0.842	16.8012	0.814929	0.063995	0.818568	26.74	0.792	0.0579866	0.804835
7.50455	0.46361	0.066645	0.527311	10.4988	0.5551	0.0194646	0.5327	19.4829	0.4661	0.0538864	0.471206	19.1028	0.733409	0.0478801	0.759821	6.59587	0.51489	0.0229853	0.522624	13.0247	0.644525	0.106869	0.632109	13.8378	0.846082	0.0464308	0.8505	17.6171	0.877239	0.141956	0.826988	28.05	0.8071	0.0812232	0.812641
7.8422	0.496521	0.0658223	0.53805	10.9787	0.554	0.0734071	0.5429	20.3907	0.4693	0.0469187	0.47728	19.9873	0.774316	0.0116682	0.776209	6.88691	0.564314	0.0396077	0.536854	13.6219	0.625216	0.0797352	0.643017	14.4768	0.845706	0.0563142	0.8582	18.433	0.902825	0.0729413	0.834977	29.36	0.8376	0.0741398	0.819999
8.17985	0.553718	0.0463504	0.548133	11.4587	0.5656	0.0983661	0.5525	21.2984	0.482	0.0337403	0.48302	20.8718	0.798151	0.0246189	0.791799	7.17796	0.56547	0.0756795	0.550342	14.2191	0.699591	0.0678357	0.653437	15.1158	0.8551	0.075903	0.8652	19.2488	0.825586	0.107633	0.842602	30.67	0.8107	0.0721401	0.826958
8.51751	0.524187	0.0393411	0.557624	11.9386	0.5981	0.0609518	0.5616	22.2062	0.5065	0.0160565	0.488479	21.7563	0.827552	0.0551456	0.806665	7.46901	0.559477	0.0532406	0.563134	14.8163	0.662522	0.120256	0.663434	15.7547	0.883466	0.0414457	0.8717	20.0647	0.825495	0.12616	0.849917	31.98	0.8442	0.0813096	0.833559
8.85516	0.503547	0.126804	0.566581	12.4186	0.5575	0.0631529	0.5704	23.114	0.47	0.0444507	0.493704	22.6409	0.791572	0.0555365	0.820874	7.76006	0.542691	0.0245489	0.575273	15.4135	0.65055	0.056408	0.673061	16.3937	0.881878	0.0814487	0.8778	20.8806	0.873046	0.0229798	0.856962	33.29	0.8548	0.0906361	0.839834
9.19281	0.564876	0.060722	0.575056	12.8985	0.5692	0.090603	0.5787	24.0217	0.4843	0.064293	0.49873	23.5254	0.876681	0.0762269	0.834482	8.05111	0.599721	0.0223241	0.5868	16.0106	0.646157	0.0816619	0.68236	17.0326	0.898588	0.0500527	0.8834	21.6964	0.845259	0.0681612	0.86377	34.6	0.8501	0.057668	0.845808
9.53046	0.581534	0.0572909	0.583095	13.3785	0.5894	0.0700263	0.5868	24.9295	0.5163	0.0332655	0.503587	24.4099	0.814102	0.0672638	0.84754	8.34215	0.612403	0.0544453	0.597753	16.6078	0.652648	0.120152	0.691367	17.6716	0.891389	0.0581291	0.8887	22.5123	0.947791	0.155951	0.870365	35.91	0.8511	0.0733615	0.851505
9.86811	0.580233	0.0403249	0.59074	13.8584	0.6389	0.101961	0.5946	25.8373	0.5252	0.0276251	0.5083	25.2944	0.874808	0.0874046	0.860089	8.6332	0.629357	0.0821318	0.608168	17.205	0.742404	0.142907	0.700113	18.3105	0.895752	0.0715162	0.8936	23.3282	0.883198	0.0481934	0.876768	37.22	0.8717	0.0742437	0.856941
10.2058	0.596832	0.028055	0.598028	14.3384	0.5947	0.0616821	0.6021	26.745	0.5119	0.0590153	0.51289	26.1789	0.849938	0.106448	0.872168	8.92425	0.621419	0.0570465	0.618079	17.8022	0.695942	0.0526483	0.708622	18.9495	0.93931	0.0521113	0.8984	24.144	0.835207	0.0911677	0.882993	38.54	0.8686	0.0675727	0.862171
10.5434	0.578958	0.0334035	0.604993	14.8183	0.6064	0.127782	0.6094	27.6528	0.5067	0.0236675	0.517373	27.0635	0.86489	0.048209	0.883811	9.2153	0.60582	0.0585261	0.627517	18.3994	0.787581	0.0463403	0.716915	19.5884	0.903913	0.0529015	0.9029	24.9599	0.85848	0.0589811	0.889055	39.85	0.863	0.0557947	0.86713
10.8811	0.64133	0.0633886	0.611663	15.2982	0.5421	0.0895691	0.6165	28.5605	0.5247	0.0421238	0.521763	27.948	0.957882	0.0297172	0.895046	9.50635	0.617708	0.0667772	0.636511	18.9966	0.733377	0.101592	0.725009	20.2274	0.8816	0.0753157	0.9072	25.7758	0.922756	0.073305	0.894962	41.16	0.867	0.052839	0.871871
11.2187	0.631772	0.0595662	0.618066	15.7782	0.6448	0.0541507	0.6234	29.4683	0.5307	0.0771681	0.526072	28.8325	0.995026	0.100079	0.905899	9.79739	0.655432	0.108349	0.645089	19.5938	0.774384	0.108175	0.73292	20.8663	0.881722	0.0470559	0.9113	26.5916	0.94593	0.0781528	0.900724	42.47	0.8969	0.0535847	0.876404
11.5564	0.641664	0.0706208	0.624225	16.2581	0.5876	0.106823	0.6301	30.3761	0.5227	0.016638	0.530308	29.717	0.881821	0.0790763	0.916393	10.0884	0.619249	0.011056	0.653276	20.1909	0.719078	0.0681333	0.740658	21.5053	0.896483	0.079951	0.9153	27.4075	0.890798	0.0334272	0.906347	43.78	0.8826	0.0554052	0.880741
11.894	0.600988	0.0965094	0.630162	16.7381	0.6379	0.030335	0.6367	31.2838	0.5409	0.0648454	0.53448	30.6015	0.958585	0.126441	0.92655	10.3795	0.653229	0.0238707	0.661098	20.7881	0.768709	0.0883293	0.748236	22.1442	0.920347	0.0373748	0.9191	28.2234	0.845356	0.0564379	0.911838	45.09	0.8898	0.064387	0.88489
12.2317	0.59739	0.080784	0.635896	17.218	0.5968	0.0504344	0.6431	32.1916	0.5267	0.0424197	0.538594	31.4861	0.956815	0.068286	0.936386	10.6705	0.643723	0.0688209	0.668575	21.3853	0.692324	0.0906586	0.75566	22.7832	0.940014	0.0787046	0.9228	29.0392	0.929995	0.0518253	0.917201	46.4	0.8758	0.0162985	0.888859
12.5693	0.609216	0.0674189	0.641444	17.698	0.6697	0.0288674	0.6494	33.0994	0.5669	0.066944	0.542655	32.3706	0.955079	0.0696633	0.945919	10.9616	0.633953	0.0400872	0.67573	21.9825	0.771485	0.0457295	0.76294	23.4221	0.944324	0.041534	0.9264	29.8551	0.911448	0.0388868	0.922442	47.71	0.8958	0.0711775	0.892658
12.907	0.651472	0.067062	0.646821	18.1779	0.6711	0.0667671	0.6555	34.0071	0.542	0.0535988	0.546667	33.2551	0.895763	0.0476934	0.955163	11.2526	0.658313	0.0682021	0.682582	22.5797	0.866737	0.109013	0.770082	24.0611	0.967895	0.0495101	0.9299	30.671	0.847321	0.124038	0.927563	49.03	0.898	0.0399087	0.896321
13.2446	0.678862	0.0684403	0.652042	18.6579	0.644	0.0664611	0.6616	34.9149	0.56	0.0689708	0.550635	34.1396	0.951769	0.0799309	0.964131	11.5437	0.692377	0.106694	0.689149	23.1768	0.762731	0.105818	0.777091	24.7	0.953458	0.0271557	0.9333	31.4868	0.932227	0.031928	0.93257	50.34	0.9178	0.043916	0.899799
13.5823	0.612266	0.0498845	0.657118	19.1378	0.7148	0.0826859	0.6675	35.8227	0.5575	0.070402	0.55456	35.0241	1.00265	0.0630037	0.972836	11.8347	0.658482	0.0249018	0.69545	23.774	0.766298	0.0986023	0.783973	25.339	0.969144	0.0618993	0.9366	32.3027	0.945978	0.10094	0.937464	51.65	0.9218	0.0601456	0.903129
13.9199	0.683139	0.0706503	0.66206	19.6178	0.6265	0.0727456	0.6733	36.7304	0.5902	0.0386017	0.558447	35.9087	0.994669	0.103705	0.981289	12.1258	0.667893	0.0636502	0.701501	24.3712	0.802267	0.101628	0.790731	25.9779	0.974239	0.0694464	0.9398	33.1186	0.953576	0.0670594	0.94225	52.96	0.9243	0.0817154	0.906315
14.2576	0.659114	0.0908596	0.666879	20.0977	0.6831	0.0788246	0.679	37.6382	0.5835	0.0645235	0.562296	36.7932	1.01349	0.0784816	0.9895	12.4168	0.673539	0.039628	0.707316	24.9684	0.786088	0.0425995	0.79737	26.6169	0.946029	0.0330105	0.9429	33.9344	0.987095	0.126577	0.946929	54.27	0.8953	0.0489455	0.909366
14.5952	0.646191	0.111497	0.671584	20.5777	0.6688	0.0628561	0.6847	38.5459	0.5649	0.0611566	0.566109	37.6777	0.969597	0.0596755	0.997479	12.7079	0.716249	0.0495327	0.71291	25.5656	0.721034	0.0923411	0.803894	27.2558	0.960116	0.0720365	0.9459	34.7503	0.996267	0.043234	0.951505	55.58	0.9023	0.0279515	0.912285
14.9329	0.70308	0.102284	0.676182	21.0576	0.6775	0.0296772	0.6902	39.4537	0.5773	0.0148077	0.569889	38.5622	1.02872	0.108608	1.00523	12.9989	0.684314	0.0667061	0.718296	26.1628	0.873667	0.0725439	0.810304	27.8948	0.966088	0.0538301	0.9489	35.5662	0.889243	0.0758307	0.95598	56.89	0.8964	0.0723597	0.91508
15.2706	0.673844	0.129329	0.680681	21.5376	0.6596	0.0577959	0.6956	40.3615	0.571	0.0500137	0.573636	39.4467	0.952779	0.167785	1.01277	13.29	0.692727	0.0243617	0.723488	26.7599	0.771063	0.0339443	0.816605	28.5338	0.982243	0.0445831	0.9518	36.382	0.905449	0.123654	0.960357	58.2	0.9058	0.0593916	0.917755
15.6082	0.686147	0.0952528	0.685087	22.0175	0.7224	0.0426316	0.701	41.2692	0.6044	0.0517304	0.577351	40.3313	1.05796	0.049114	1.0201	13.581	0.702598	0.0405604	0.728496	27.3571	0.824361	0.0760182	0.822799	29.1727	0.965067	0.0763147	0.9546	37.1979	0.960981	0.104671	0.964637	59.51	0.9314	0.0266077	0.920316
15.9459	0.668993	0.102012	0.689406	22.4975	0.7098	0.0668803	0.7063	42.177	0.5882	0.0729917	0.581036	41.2158	1.02015	0.116029	1.02723	13.8721	0.715666	0.0682355	0.733331	27.9543	0.785439	0.112299	0.828888	29.8117	0.979205	0.0825504	0.9574	38.0138	0.99586	0.0758042	0.968823	60.83	0.9143	0.0329465	0.922786
16.2835	0.74438	0.0595871	0.693643	22.9774	0.7066	0.0504666	0.7115	43.0848	0.5768	0.0357385	0.58469	42.1003	1.00869	0.0950032	1.03417	14.1631	0.730192	0.084475	0.738005	28.5515	0.822389	0.0710437	0.834875	30.4506	0.971664	0.0687814	0.9601	38.8297	0.981787	0.0432486	0.972918	62.14	0.9568	0.0676047	0.925132
16.6212	0.692146	0.0536636	0.697804	23.4574	0.7789	0.0950655	0.7166	43.9925	0.6037	0.0694778	0.588315	42.9848	1.06864	0.157514	1.04092	14.4542	0.729351	0.0452617	0.742526	29.1487	0.911291	0.0716164	0.840762	31.0895	0.98101	0.0699455	0.9628	39.6455	1.01919	0.188082	0.976922	63.45	0.9234	0.0565181	0.927378
16.9588	0.697356	0.110413	0.701891	23.9373	0.6844	0.0461871	0.7216	44.9003	0.6199	0.0600047	0.591911	43.8693	1.09351	0.112562	1.04748	14.7452	0.801983	0.0769057	0.746903	29.7459	0.859874	0.063402	0.84655	31.7285	0.953524	0.0419675	0.9653	40.4614	1.00099	0.139786	0.980839	64.76	0.9465	0.0551391	0.929527
17.2965	0.686269	0.0889177	0.70591	24.4173	0.7202	0.0546866	0.7266	45.8081	0.5911	0.0315543	0.59548	44.7539	1.04042	0.096564	1.05387	15.0363	0.745836	0.0374305	0.751146	30.3431	0.847468	0.167501	0.852242	32.3675	0.982619	0.0729306	0.9679	41.2773	0.984264	0.128386	0.98467	66.07	0.9218	0.0465999	0.931585
17.6341	0.708605	0.10885	0.709864	24.8972	0.713	0.0476737	0.7315	46.7158	0.5754	0.047968	0.59902	45.6384	1.06237	0.156273	1.06008	15.3273	0.713648	0.0324801	0.755261	30.9402	0.859437	0.0872253	0.85784	33.0064	1.00962	0.095148	0.9703	42.0931	0.935869	0.0894935	0.988417	67.38	0.9383	0.0644311	0.933555
17.9718	0.745428	0.0947835	0.713755	25.3772	0.7205	0.00979216	0.7363	47.6236	0.6262	0.0486509	0.602533	46.5229	1.08526	0.140475	1.06613	15.6183	0.731555	0.0507019	0.759257	31.5374	0.858382	0.0873906	0.863345	33.6454	0.976627	0.0762029	0.9728	42.909	0.980244	0.0981146	0.992082	68.69	0.9478	0.061989	0.935441
18.3094	0.726201	0.119853	0.717587	25.8571	0.726	0.0474451	0.7411	48.5313	0.6164	0.05062	0.606019	47.4074	1.05374	0.147949	1.07202	15.9094	0.767726	0.105451	0.763141	32.1346	0.855078	0.0931727	0.868759	34.2843	0.985578	0.0617567	0.9751	43.7249	0.982656	0.059946	0.995667	70	0.9309	0.0674289	0.937246
18.6471	0.728179	0.0919556	0.721363	26.337	0.7665	0.0609188	0.7458	49.4391	0.6	0.0607188	0.609479	48.2919	1.03071	0.150946	1.07776	16.2005	0.727462	0.0751717	0.766918	32.7318	0.916546	0.0878621	0.874084	34.9233	0.967768	0.0658802	0.9774	44.5407	1.0917	0.0688106	0.999173	71.32	0.9416	0.0735642	0.938987
18.9847	0.674501	0.061681	0.725084	26.817	0.7587	0.0332095	0.7504	50.3469	0.5984	0.0506817	0.612912	49.1765	1.03842	0.143425	1.08334	16.4915	0.794116	0.037035	0.770595	33.329	0.913709	0.172798	0.879321	35.5622	0.969915	0.0811924	0.9797	45.3566	0.979842	0.0571618	1.0026	72.63	0.9362	0.0485334	0.94064
19.3224	0.70974	0.127614	0.728753	27.2969	0.7357	0.0893978	0.755	51.2546	0.6168	0.0587563	0.616319	50.061	1.04006	0.158625	1.08877	16.7826	0.779317	0.0789653	0.774177	33.9262	0.79926	0.0691893	0.884471	36.2012	0.981304	0.0591858	0.9819	46.1725	0.976194	0.124286	1.00596	73.94	0.9341	0.073307	0.942223
19.66	0.756449	0.0531345	0.732372	27.7769	0.7608	0.0722809	0.7595	52.1624	0.6074	0.0334054	0.6197	50.9455	1.09116	0.107781	1.09406	17.0736	0.80049	0.0175133	0.777671	34.5234	0.888173	0.0872097	0.889537	36.8401	0.994206	0.0596608	0.9841	46.9883	0.983463	0.118755	1.00924	75.25	0.9466	0.0403057	0.943739
19.9977	0.751369	0.0311403	0.735942	28.2568	0.7306	0.0303496	0.7639	53.0702	0.638	0.0207473	0.623056	51.83	1.08628	0.168046	1.09921	17.3646	0.774749	0.0686637	0.781081	35.1205	0.908459	0.112702	0.89452	37.4791	1.0062	0.107744	0.9862	47.8042	0.992678	0.115579	1.01245	76.56	0.9154	0.0462342	0.945189
20.3353	0.739736	0.0675221	0.739466	28.7368	0.7445	0.0523412	0.7683	53.9779	0.6093	0.0591208	0.626387	52.7145	1.10951	0.126931	1.10422	17.6557	0.817048	0.0900919	0.784411	35.7177	0.933581	0.134206	0.899421	38.118	0.970561	0.0849612	0.9883	48.6201	1.00844	0.145717	1.01559	77.87	0.9587	0.0727957	0.946578
20.673	0.760111	0.0511189	0.742944	29.2167	0.7391	0.0601812	0.7726	54.8857	0.6089	0.0416318	0.629692	53.5991	1.1	0.105104	1.1091	17.9467	0.762351	0.0302437	0.787667	36.3149	0.952788	0.113462	0.904241	38.757	0.98525	0.054639	0.9903	49.4359	1.03104	0.0983695	1.01866	79.18	0.923	0.0590596	0.947907
21.0106	0.799802	0.070964	0.746378	29.6967	0.7541	0.0466644	0.7768	55.7935	0.6273	0.0351619	0.632973	54.4836	1.10843	0.131898	1.11385	18.2378	0.745203	0.0333255	0.790852	36.9121	0.915019	0.109378	0.908982	39.3959	0.994018	0.10842	0.9923	50.2518	1.05562	0.0595431	1.02166	80.49	0.9537	0.0513758	0.949179
21.3483	0.768825	0.0429251	0.74977	30.1766	0.7581	0.0872329	0.781	56.7012	0.6237	0.02066	0.636229	55.3681	1.09594	0.119224	1.11848	18.5288	0.773225	0.0613778	0.79397	37.5093	0.927129	0.0644762	0.913646	40.0349	0.996063	0.100403	0.9943	51.0677	0.996443	0.10652	1.0246	81.81	0.9375	0.0384912	0.950407
21.6859	0.77945	0.0964904	0.75312	30.6566	0.8212	0.0855778	0.7852	57.609	0.6265	0.0200601	0.639461	56.2526	1.17299	0.166957	1.12299	18.8199	0.796868	0.129989	0.797025	38.1064	0.883035	0.163517	0.918232	40.6738	0.984091	0.0879194	0.9962	51.8835	1.04872	0.0644199	1.02747	83.12	0.9294	0.0456433	0.951572
22.0236	0.747249	0.0782335	0.756429	31.1365	0.7991	0.110928	0.7893	58.5168	0.6265	0.0250321	0.642669	57.1371	1.16702	0.169456	1.12737	19.1109	0.772024	0.0573131	0.80002	38.7036	0.932593	0.0576324	0.922744	41.3128	0.992628	0.105948	0.9981	52.6994	1.01883	0.102621	1.03028	84.43	0.9519	0.0663913	0.952688
22.3612	0.790477	0.128964	0.7597	31.6165	0.7906	0.0641081	0.7933	59.4245	0.6212	0.0356501	0.645852	58.0217	1.12194	0.162413	1.13165	19.402	0.807721	0.0523114	0.802958	39.3008	0.919901	0.0618223	0.927182	41.9517	0.990003	0.095076	0.9999	53.5153	1.06219	0.0988999	1.03303	85.74	0.9854	0.0187557	0.953756
22.6989	0.752632	0.072791	0.762931	32.0964	0.8236	0.0859494	0.7973	60.3323	0.6281	0.015341	0.649012	58.9062	1.16765	0.154499	1.13581	19.693	0.823861	0.0844595	0.805843	39.898	1.01458	0.136396	0.931546	42.5907	1.02553	0.102372	1.0017	54.3312	1.1078	0.0867762	1.03572	87.05	0.9513	0.0384787	0.954779
23.0365	0.821083	0.0857239	0.766126	32.5764	0.802	0.13122	0.8012	61.24	0.6473	0.0480532	0.652148	59.7907	1.11761	0.149726	1.13986	19.9841	0.766227	0.0458432	0.808677	40.4952	0.949031	0.15426	0.93584	43.2296	1.01393	0.10532	1.0034	55.147	1.07018	0.083693	1.03835	88.36	0.9657	0.0310639	0.955758
23.3742	0.784402	0.0829063	0.769283	33.0563	0.8388	0.126285	0.805	62.1478	0.6477	0.0356335	0.655261	60.6752	1.16119	0.18215	1.1438	20.2751	0.836625	0.0538937	0.811463	41.0924	0.968372	0.0261058	0.940063	43.8686	1.02161	0.0789837	1.0051	55.9629	1.02758	0.10739	1.04092	89.67	0.9695	0.0512493	0.956695
23.7118	0.769699	0.110373	0.772404	33.5363	0.8747	0.154274	0.8089	63.0556	0.697	0.0703635	0.658351	61.5597	1.13639	0.0928226	1.14764	20.5662	0.815544	0.0532984	0.814202	41.6895	0.897907	0.0873675	0.944216	44.5076	1.02116	0.0859675	1.0068	56.7788	1.11288	0.0625474	1.04344	90.98	0.968	0.0371933	0.957592
24.0495	0.699252	0.129206	0.77549	34.0162	0.8466	0.138096	0.8126	63.9633	0.6762	0.0606621	0.661417	62.4443	1.11274	0.181863	1.15138	20.8572	0.786553	0.0718142	0.816899	42.2867	0.911246	0.0511475	0.948302	45.1465	1.04317	0.124904	1.0085	57.5946	1.09645	0.07044	1.0459	92.29	0.9419	0.0447376	0.95845
24.3871	0.80333	0.149784	0.778541	34.4962	0.8487	0.119298	0.8163	64.8711	0.6759	0.0773561	0.664461	63.3288	1.16516	0.139389	1.15502	21.1483	0.816004	0.0303925	0.819554	42.8839	0.986755	0.0815736	0.952321	45.7854	1.00814	0.0718126	1.0101	58.4105	1.00536	0.0552513	1.04831	93.61	0.9604	0.0327132	0.959279
24.7248	0.770103	0.114766	0.781558	34.9761	0.8407	0.118915	0.82	65.7789	0.6659	0.0661371	0.667482	64.2133	1.16921	0.118613	1.15857	21.4393	0.816203	0.0982191	0.82217	43.4811	0.959162	0.103667	0.956273	46.4244	1.01001	0.0921602	1.0116	59.2263	1.04669	0.103712	1.05066	94.92	0.9639	0.0430386	0.960065
25.0624	0.767056	0.0998761	0.784542	35.4561	0.8944	0.132728	0.8236	66.6866	0.6621	0.0786627	0.67048	65.0978	1.125	0.169682	1.16203	21.7304	0.82575	0.0387178	0.824748	44.0783	1.03623	0.145929	0.960161	47.0633	1.02053	0.1257	1.0132	60.0422	1.08241	0.0674722	1.05296	96.23	0.9416	0.0113933	0.960818
25.4001	0.76214	0.155161	0.787492	35.936	0.8743	0.104147	0.8271	67.5944	0.6802	0.0478032	0.673456	65.9823	1.21787	0.142315	1.16539	22.0214	0.7796	0.0616437	0.827291	44.6755	0.973111	0.0843016	0.963986	47.7023	1.01141	0.0997941	1.0147	60.8581	1.04702	0.0990625	1.05522	97.54	0.9473	0.0547917	0.961539
25.7378	0.743401	0.067724	0.79041	36.416	0.8082	0.0842046	0.8307	68.5022	0.6721	0.116324	0.67641	66.8669	1.14234	0.148627	1.16867	22.3125	0.849131	0.0833979	0.8298	45.2727	0.971791	0.0522074	0.967747	48.3413	0.992082	0.112021	1.0162	61.674	1.00782	0.145435	1.05742	98.85	0.9316	0.0314959	0.962229
26.0754	0.823635	0.118289	0.793297	36.8959	0.8525	0.137765	0.8341	69.4099	0.6892	0.0588841	0.679342	67.7514	1.18409	0.140248	1.17186	22.6035	0.814896	0.0771105	0.832276	45.8698	0.9612	0.114862	0.971447	48.9802	1.03157	0.0839635	1.0176	62.4898	1.08256	0.0901595	1.05957	100.16	0.9703	0.0587411	0.962889
26.4131	0.820406	0.0953024	0.796152	37.3758	0.8816	0.148809	0.8375	70.3177	0.6689	0.0951713	0.682252	68.6359	1.20837	0.190723	1.17496	22.8945	0.800499	0.0562245	0.834722	46.467	1.00928	0.104868	0.975087	49.6192	0.989873	0.0778882	1.019	63.3057	1.00143	0.101903	1.06168	101.47	0.9847	0.0631385	0.963522
26.7507	0.793594	0.0918877	0.798975	37.8558	0.8459	0.0578024	0.8409	71.2254	0.6789	0.0610578	0.68514	69.5204	1.20968	0.177173	1.17799	23.1856	0.851906	0.0796789	0.837138	47.0642	1.03584	0.059666	0.978666	50.2581	1.0186	0.110554	1.0204	64.1216	1.05689	0.0919418	1.06374
27.0884	0.820466	0.0937538	0.801769	38.3357	0.8455	0.0928971	0.8442	72.1332	0.6681	0.0120585	0.688007	70.4049	1.1865	0.202083	1.18093	23.4766	0.882485	0.0818863	0.839526	47.6614	0.996089	0.107582	0.982188	50.8971	1.0101	0.0888158	1.0218	64.9374	1.04691	0.138835	1.06576
27.426	0.76133	0.104287	0.804532	38.8157	0.8847	0.0461652	0.8475	73.041	0.7083	0.0610757	0.690852	71.2895	1.14039	0.236998	1.1838	23.7677	0.876778	0.0554828	0.841887	48.2586	0.994514	0.184302	0.985651	51.536	1.03012	0.122939	1.0231	65.7533	1.07391	0.0899336	1.06773
27.7637	0.779389	0.0412802	0.807266	39.2957	0.8648	0.0961291	0.8507	73.9487	0.7156	0.0311331	0.693676	72.174	1.18815	0.198368	1.18659	24.0587	0.817414	0.0369488	0.844222	48.8558	1.05774	0.0871181	0.989058	52.175	1.01467	0.107533	1.0244	66.5692	1.08116	0.130517	1.06966
28.1013	0.797276	0.075082	0.80997	39.7756	0.7951	0.0456466	0.8539	74.8565	0.7022	0.0770427	0.696479	73.0585	1.19349	0.212217	1.18932	24.3498	0.882186	0.0264231	0.846532	49.4529	0.95159	0.0945202	0.992408	52.8139	1.03482	0.116901	1.0257	67.385	1.11575	0.11454	1.07155
28.439	0.834822	0.102718	0.812645	40.2555	0.8457	0.110272	0.8571	75.7643	0.6926	0.0946198	0.699261	73.943	1.21237	0.223802	1.19196	24.6408	0.801624	0.0720389	0.848818	50.0501	1.06008	0.105289	0.995704	53.4529	1.03962	0.101016	1.0269	68.2009	1.06203	0.198489	1.0734
28.7766	0.76356	0.122344	0.815292	40.7355	0.8541	0.0908083	0.8602	76.672	0.7063	0.0417686	0.702022	74.8275	1.19826	0.162146	1.19454	24.9319	0.864828	0.0543866	0.851082	50.6473	0.941212	0.130236	0.998946	54.0918	1.03756	0.11336	1.0281	69.0168	1.06718	0.124728	1.0752
29.1143	0.818276	0.0868206	0.817911	41.2154	0.8637	0.126378	0.8632	77.5798	0.7087	0.0349098	0.704763	75.7121	1.16259	0.204735	1.19706	25.2229	0.859338	0.0559677	0.853323	51.2445	0.979705	0.0923609	1.00214	54.7308	1.01753	0.131127	1.0293	69.8326	1.0439	0.0658684	1.07697
29.4519	0.852639	0.0638803	0.820502	41.6954	0.8882	0.104359	0.8663	78.4876	0.7241	0.0743298	0.707483	76.5966	1.19857	0.20961	1.1995	25.514	0.875307	0.102011	0.855544	51.8417	1.04333	0.0772418	1.00527	55.3697	1.05455	0.127113	1.0305	70.6485	1.08716	0.0470085	1.07869
29.7896	0.839337	0.0410995	0.823065	42.1753	0.8872	0.128773	0.8692	79.3953	0.7139	0.0372839	0.710184	77.4811	1.20065	0.287963	1.20189	25.805	0.820226	0.102899	0.857744	52.4389	1.00982	0.0964643	1.00836	56.0087	1.0284	0.124248	1.0316	71.4644	1.06198	0.182869	1.08038
30.1272	0.831854	0.123431	0.825601	42.6553	0.8848	0.127153	0.8722	80.3031	0.6933	0.0748749	0.712863	78.3656	1.1946	0.305076	1.20421	26.0961	0.87182	0.0519333	0.859925	53.0361	1.05046	0.0167925	1.01139	56.6476	1.01573	0.108472	1.0328	72.2802	1.09234	0.085099	1.08204
30.4649	0.78215	0.106088	0.82811	43.1352	0.894	0.0558726	0.8751	81.2108	0.7408	0.0312286	0.715523	79.2501	1.19276	0.19031	1.20647	26.3871	0.878673	0.0369449	0.862086	53.6332	1.01314	0.0423897	1.01438	57.2866	1.01176	0.141122	1.0339	73.0961	1.10933	0.0980545	1.08365
30.8025	0.801381	0.0871916	0.830593	43.6152	0.8926	0.0798017	0.8779	82.1186	0.7453	0.046625	0.718163	80.1347	1.23614	0.254653	1.20867	26.6782	0.857759	0.0619466	0.86423	54.2304	0.997242	0.102118	1.01731	57.9255	1.03912	0.178898	1.0349	73.912	0.995084	0.0641306	1.08523
31.1402	0.824371	0.118603	0.83305	44.0951	0.8874	0.100456	0.8808	83.0264	0.7114	0.0216143	0.720784					26.9692	0.863114	0.0518643	0.866355	54.8276	1.00727	0.124173	1.0202	58.5645	1.03978	0.178454	1.036	74.7279	1.12831	0.119823	1.08678
31.4778	0.877696	0.10503	0.83548	44.5751	0.8855	0.145748	0.8835	83.9341	0.7414	0.079732	0.723385					27.2603	0.924633	0.0387907	0.868464	55.4248	0.967595	0.0849159	1.02304	59.2034	1.04832	0.185597	1.037	75.5437	1.04209	0.126957	1.08829
31.8155	0.833462	0.117684	0.837885	45.055	0.9421	0.0864552	0.8863	84.8419	0.7567	0.0395867	0.725966					27.5513	0.873766	0.0541776	0.870556	56.022	1.09388	0.109143	1.02583	59.8424	1.03691	0.131616	1.038	76.3596	1.0868	0.0632566	1.08977
32.1531	0.821556	0.112424	0.840265	45.535	0.9224	0.0718467	0.889	85.7497	0.7706	0.0820219	0.728528					27.8424	0.931234	0.0429904	0.872632	56.6191	1.00459	0.0704562	1.02858	60.4813	1.02915	0.120812	1.039	77.1754	1.17174	0.0407193	1.09122
32.4908	0.879796	0.0898077	0.84262	46.0149	0.9424	0.124876	0.8917	86.6574	0.731	0.0522493	0.731072					28.1334	0.915694	0.139371	0.874693	57.2163	1.1063	0.185714	1.03129	61.1203	1.01843	0.131489	1.04	77.9913	1.081	0.0178762	1.09264
32.8284	0.845577	0.12325	0.84495	46.4949	0.8684	0.0996124	0.8943	87.5652	0.7445	0.057377	0.733596					28.4245	0.854745	0.0489574	0.876738	57.8135	1.05333	0.197388	1.03395	61.7593	1.03863	0.145532	1.0409	78.8072	1.07792	0.0477651	1.09402
33.1661	0.788725	0.108633	0.847255	46.9748	0.8641	0.106119	0.8969	88.473	0.702	0.11345	0.736101					28.7155	0.909698	0.126592	0.878769	58.4107	1.02988	0.0208666	1.03656	62.3982	1.05821	0.163164	1.0418	79.6231	1.08528	0.126888	1.09537
33.5037	0.833585	0.0926491	0.849536	47.4548	0.8953	0.0822286	0.8995	89.3807	0.7349	0.0428755	0.738588					29.0066	0.92335	0.0649721	0.880785	59.0079	1.08051	0.0530817	1.03913	63.0371	1.0321	0.14424	1.0427	80.4389	1.05008	0.0454409	1.0967
33.8414	0.869067	0.100088	0.851793	47.9347	0.923	0.10728	0.902	90.2885	0.7049	0.0594898	0.741056					29.2976	0.92875	0.0528339	0.882788	59.6051	1.01744	0.117975	1.04166	63.6761	1.03851	0.146839	1.0436	81.2548	1.05759	0.131522	1.09799
34.1791	0.893059	0.156282	0.854027	48.4147	0.9051	0.131474	0.9045	91.1963	0.7477	0.0752759	0.743506					29.5887	0.909862	0.10001	0.884777	60.2023	1.0804	0.0966736	1.04415	64.3151	1.03775	0.136858	1.0445	82.0707	1.14335	0.0592859	1.09926
34.5167	0.843721	0.0446873	0.856237	48.8946	0.8689	0.0859463	0.907	92.104	0.7277	0.0675612	0.745937					29.8797	0.920943	0.0972228	0.886753	60.7994	1.05905	0.0990324	1.0466	64.954	1.05271	0.173188	1.0453	82.8865	1.03157	0.157284	1.1005
34.8544	0.856703	0.0528665	0.858424	49.3745	0.9066	0.154469	0.9094	93.0118	0.7335	0.0706673	0.748351					30.1708	0.904159	0.0764235	0.888716	61.3966	1.02599	0.0342071	1.04901	65.593	1.01471	0.105647	1.0462	83.7024	1.15596	0.0863773	1.10171
35.192	0.883435	0.0241573	0.860588	49.8545	0.9337	0.137544	0.9118	93.9196	0.7406	0.0543363	0.750746					30.4618	0.878408	0.0553279	0.890666	61.9938	1.06266	0.151952	1.05138	66.2319	1.03017	0.146592	1.047	84.5183	1.04755	0.175913	1.1029
35.5297	0.816319	0.0643031	0.862729	50.3344	0.9738	0.206432	0.9141	94.8273	0.7575	0.0558195	0.753123					30.7528	0.938842	0.152167	0.892604	62.591	0.989691	0.0946874	1.05371	66.8709	1.04823	0.11962	1.0478	85.3341	1.10791	0.114592	1.10406
35.8673	0.858516	0.0917731	0.864848	50.8144	0.9644	0.14661	0.9165	95.7351	0.7248	0.0902369	0.755483					31.0439	0.932264	0.152493	0.89453	63.1882	0.992254	0.189972	1.056	67.5098	0.99992	0.140687	1.0486	86.15	1.16075	0.0775581	1.10519
36.205	0.818831	0.057672	0.866945	51.2944	0.9268	0.147678	0.9188	96.6428	0.734	0.0633679	0.757825					31.3349	0.929216	0.125207	0.896444	63.7854	1.06999	0.157601	1.05825	68.1488	1.02723	0.14845	1.0493	86.9659	1.05791	0.19968	1.1063
36.5426	0.879585	0.108901	0.869019	51.7743	0.8696	0.0846593	0.921	97.5506	0.7569	0.0716785	0.76015					31.626	0.87713	0.025556	0.898347	64.3825	0.982426	0.118006	1.06047	68.7877	1.03034	0.139456	1.0501	87.7817	1.06398	0.235395	1.10739
36.8803	0.897373	0.0600226	0.871072	52.2542	0.8814	0.0657149	0.9233	98.4584	0.757	0.0724214	0.762457					31.917	0.883661	0.0640644	0.900238	64.9797	1.09754	0.200771	1.06265	69.4267	1.04015	0.138041	1.0508	88.5976	1.13091	0.138808	1.10845
37.2179	0.919887	0.0555294	0.873104	52.7342	0.903	0.0836794	0.9255	99.3661	0.7379	0.0133823	0.764747					32.2081	0.885399	0.0274201	0.902118	65.5769	0.937211	0.178905	1.0648	70.0656	1.03665	0.148065	1.0515	89.4135	1.23314	0.138743	1.10949
37.5556	0.947239	0.182646	0.875114	53.2141	0.9057	0.104269	0.9277	100.274	0.7812	0.040141	0.767021					32.4991	0.90715	0.0873352	0.903988	66.1741	1.11087	0.263287	1.06691	70.7046	1.01684	0.171679	1.0522	90.2293	1.1324	0.153061	1.11051
37.8932	0.885378	0.0996504	0.877103	53.6941	0.9127	0.0798181	0.9298	101.182	0.7562	0.0529635	0.769277					32.7902	0.922479	0.0531424	0.905846	66.7713	1.02027	0.227363	1.06898	71.3435	1.05998	0.156333	1.0529	91.0452	1.03507	0.159551	1.1115
38.2309	0.896573	0.122694	0.879071	54.174	0.8924	0.0556173	0.9319	102.089	0.7696	0.0718419	0.771516					33.0812	0.913646	0.0820573	0.907694	67.3685	0.932221	0.147723	1.07102	71.9825	1.04021	0.150066	1.0536	91.8611	1.15675	0.155407	1.11247
38.5685	0.911583	0.120475	0.881019	54.654	0.9308	0.100934	0.934	102.997	0.7706	0.0395028	0.773739					33.3723	0.925051	0.0804508	0.909532	67.9656	1.08618	0.177832	1.07303	72.6214	1.06592	0.183379	1.0542	92.6769	1.11917	0.0909604	1.11342
38.9062	0.88424	0.074194	0.882947	55.1339	0.9256	0.155857	0.9361	103.905	0.7646	0.0438316	0.775945					33.6633	0.9446	0.0708941	0.911359	68.5628	0.955436	0.204092	1.07501	73.2604	1.01859	0.156638	1.0549	93.4928	1.07947	0.209221	1.11435
39.2438	0.829857	0.108783	0.884854	55.6139	0.892	0.112808	0.9381	104.813	0.7799	0.0445501	0.778134					33.9544	0.958178	0.0534934	0.913177	69.16	0.940738	0.127088	1.07695	73.8993	1.01737	0.15642	1.0555	94.3087	1.1012	0.0352717	1.11526
39.5815	0.925096	0.173508	0.886741	56.0938	0.9637	0.146383	0.9401	105.72	0.7583	0.0858858	0.780308					34.2454	0.899456	0.0415539	0.914984	69.7572	1.06954	0.275832	1.07886	74.5383	1.04887	0.162995	1.0561	95.1245	1.08598	0.0579142	1.11615
39.9191	0.856614	0.0646247	0.888608	56.5738	0.9026	0.116262	0.9421	106.628	0.7522	0.0814485	0.782465					34.5365	0.947065	0.0818422	0.916782	70.3544	1.04064	0.23476	1.08074	75.1772	1.07301	0.161006	1.0567	95.9404	1.20134	0.108467	1.11702
40.2568	0.851075	0.165837	0.890456	57.0537	0.9366	0.121731	0.944	107.536	0.8167	0.0804435	0.784606					34.8275	0.969125	0.0445982	0.91857	70.9516	1.05507	0.222148	1.08259	75.8162	1.04321	0.176372	1.0573	96.7563	1.17509	0.144462	1.11787
40.5944	0.869851	0.143274	0.892285	57.5337	0.9417	0.132193	0.946	108.444	0.7704	0.0822789	0.786731					35.1186	0.93089	0.149469	0.920349	71.5487	1.10052	0.210764	1.08441	76.4551	1.05316	0.133911	1.0579	97.5721	1.04288	0.110312	1.1187
40.9321	0.972439	0.151379	0.894094	58.0136	0.9132	0.0952872	0.9479	109.352	0.8074	0.107759	0.78884					35.4096	0.962936	0.0622041	0.922118	72.1459	1.09371	0.280879	1.08619	77.0941	1.04405	0.168569	1.0585	98.388	1.14739	0.149859	1.11952
41.2698	0.936452	0.0650245	0.895885	58.4936	0.9097	0.125763	0.9497	110.259	0.7861	0.0651359	0.790933					35.7007	0.9668	0.112108	0.923878	72.7431	1.07402	0.194091	1.08795	77.7331	1.04013	0.150172	1.059	99.2039	1.14121	0.162031	1.12031
41.6074	0.946087	0.0993971	0.897657	58.9735	0.9232	0.133427	0.9516	111.167	0.7892	0.0508149	0.793011					35.9917	0.862271	0.0835046	0.925629	73.3403	1.08725	0.243419	1.08968	78.372	1.07426	0.197276	1.0596	100.02	1.20339	0.10126	1.12109
41.9451	0.948963	0.194231	0.89941	59.4535	0.9149	0.116618	0.9534	112.075	0.8124	0.0768026	0.795073					36.2828	0.953463	0.0599544	0.92737	73.9375	0.986515	0.169032	1.09139	79.0109	1.09205	0.206238	1.0601	100.836	1.04721	0.110741	1.12186
42.2827	0.917218	0.0906401	0.901145	59.9334	0.9415	0.131477	0.9552	112.983	0.8185	0.050048	0.79712					36.5738	1.01623	0.0469743	0.929103	74.5347	1.11252	0.189507	1.09306	79.6499	1.06438	0.16961	1.0606	101.651	1.07157	0.084395	1.1226
42.6204	0.896531	0.06982	0.902862	60.4134	0.9158	0.127497	0.957	113.89	0.8031	0.0393273	0.799152					36.8649	0.899564	0.0957727	0.930827	75.1319	1.08556	0.233516	1.09471	80.2889	1.07167	0.197731	1.0611	102.467	1.11384	0.139466	1.12333
42.958	0.913154	0.151691	0.90456	60.8933	0.9203	0.120876	0.9587	114.798	0.7916	0.063046	0.801169					37.1559	0.909126	0.0527929	0.932543	75.729	1.1051	0.27552	1.09633	80.9278	1.04139	0.141985	1.0616	103.283	1.08063	0.115957	1.12404
43.2957	0.913361	0.10683	0.906242	61.3732	0.9362	0.125197	0.9605	115.706	0.8571	0.0337861	0.80317					37.4469	0.960236	0.0787723	0.934249	76.3262	1.06864	0.209061	1.09792	81.5668	1.07569	0.193011	1.0621	104.099	1.09601	0.0518509	1.12474
43.6333	0.895098	0.121169	0.907905	61.8532	0.9388	0.0941937	0.9622	116.614	0.8169	0.103832	0.805157					37.738	0.877443	0.100533	0.935947	76.9234	1.0731	0.165135	1.09949	82.2057	1.06671	0.175737	1.0626	104.915	1.10741	0.151989	1.12542
43.971	0.917486	0.0899766	0.909551	62.3332	1.0261	0.174725	0.9638	117.521	0.7882	0.0315343	0.807129					38.029	0.989487	0.0850972	0.937637	77.5206	1.08608	0.22256	1.10103	82.8447	1.07296	0.176978	1.0631	105.731	1.15894	0.0345149	1.12609
44.3086	0.905766	0.105566	0.91118	62.8131	0.888	0.112589	0.9655	118.429	0.785	0.0244793	0.809086					38.3201	0.901147	0.0942243	0.939318	78.1178	1.11037	0.183358	1.10255	83.4836	1.05787	0.170845	1.0635	106.547	1.18788	0.0954864	1.12674
44.6463	0.902683	0.0614649	0.912792	63.2931	0.9529	0.147471	0.9671	119.337	0.8282	0.0656643	0.811028					38.6112	0.948249	0.0571812	0.940991	78.715	1.06325	0.279091	1.10404	84.1226	1.0467	0.154253	1.064
44.9839	0.93192	0.0406832	0.914387	63.773	0.9881	0.0690551	0.9687	120.245	0.8278	0.0261964	0.812956					38.9022	0.955993	0.103516	0.942656	79.3121	1.15264	0.174422	1.1055	84.7615	1.04709	0.192184	1.0644
45.3216	0.909976	0.199063	0.915965	64.2529	0.9264	0.121668	0.9703									39.1932	0.918389	0.0703707	0.944312	79.9093	1.08162	0.192219	1.10695	85.4005	1.08804	0.15923	1.0648
45.6592	0.889858	0.0771512	0.917527	64.7329	0.9634	0.133468	0.9719									39.4843	0.911792	0.0717699	0.94596	80.5065	1.05482	0.201385	1.10837	86.0394	1.10364	0.193077	1.0652
45.9969	0.885346	0.0862864	0.919072	65.2128	0.9969	0.136468	0.9734									39.7753	0.97925	0.094759	0.9476	81.1037	1.10784	0.21816	1.10976	86.6784	1.07792	0.21031	1.0657
46.3345	0.930868	0.0889312	0.920602	65.6928	0.9724	0.148432	0.975									40.0664	0.948825	0.104112	0.949233	81.7009	1.0538	0.232199	1.11114	87.3173	1.10021	0.210121	1.0661
46.6722	0.887531	0.156406	0.922115	66.1727	1.0051	0.172601	0.9765									40.3574	0.928031	0.0800361	0.950857	82.2981	1.20262	0.191171	1.11249	87.9563	1.07151	0.239223	1.0665
47.0098	0.956678	0.126271	0.923613	66.6527	0.9356	0.154697	0.978									40.6485	0.989862	0.125708	0.952474	82.8953	1.16361	0.227947	1.11382	88.5952	1.06285	0.204345	1.0668
47.3475	0.924009	0.0459028	0.925094	67.1326	0.9922	0.0711031	0.9794									40.9395	0.95148	0.0858146	0.954082	83.4924	1.19371	0.107097	1.11512	89.2342	1.08606	0.166615	1.0672
47.6851	0.907416	0.11334	0.926561	67.6126	0.9758	0.130183	0.9809									41.2306	1.00589	0.046895	0.955683	84.0896	1.05232	0.134289	1.11641	89.8731	1.08791	0.186013	1.0676
48.0228	0.959013	0.142401	0.928012	68.0925	0.9536	0.107439	0.9823									41.5216	0.979216	0.0968679	0.957276	84.6868	1.20331	0.217899	1.11767
48.3604	0.935394	0.117274	0.929448	68.5725	1.0098	0.168334	0.9837									41.8127	0.980039	0.0665958	0.958862	85.284	1.05176	0.23149	1.11892
48.6981	0.923292	0.111023	0.930868	69.0524	0.9658	0.111489	0.9851									42.1037	0.938574	0.0343355	0.96044	85.8812	1.1856	0.25063	1.12014
49.0358	0.892559	0.0724226	0.932274	69.5324	0.9926	0.106726	0.9865									42.3948	0.917544	0.119886	0.96201	86.4784	1.23545	0.242211	1.12134
49.3734	0.96132	0.105205	0.933666	70.0123	0.9923	0.149591	0.9878									42.6858	0.957901	0.0743464	0.963573	87.0755	1.1161	0.327386	1.12253
49.7111	0.926723	0.100575	0.935042	70.4923	0.977	0.123596	0.9891									42.9769	0.923901	0.0815488	0.965129	87.6727	1.10859	0.198747	1.12369
50.0487	0.903761	0.0978158	0.936405	70.9722	0.9859	0.12285	0.9905									43.2679	0.945033	0.040108	0.966677	88.2699	1.10517	0.173418	1.12483
50.3864	0.943736	0.0726275	0.937753	71.4522	0.9907	0.114985	0.9918									43.559	0.984412	0.0814573	0.968218	88.8671	1.1562	0.250089	1.12596
50.724	0.921126	0.0409618	0.939087	71.9321	1.0043	0.183688	0.993									43.85	0.952092	0.0978247	0.969752	89.4643	1.16536	0.231734	1.12707
51.0617	0.896342	0.130569	0.940407	72.4121	0.951	0.102574	0.9943									44.1411	0.963458	0.0755731	0.971278	90.0615	1.21526	0.172259	1.12816
51.3993	0.961714	0.112117	0.941713	72.892	1.0042	0.155662	0.9955									44.4321	0.981834	0.123511	0.972797	90.6586	1.18977	0.151844	1.12923
51.737	0.900335	0.150285	0.943006	73.3719	0.9989	0.154617	0.9968									44.7231	0.983531	0.0400475	0.974309	91.2558	1.10753	0.331429	1.13028
52.0746	0.875789	0.121295	0.944285	73.8519	1.0402	0.198494	0.998									45.0142	0.920094	0.0528526	0.975814	91.853	1.12814	0.19811	1.13132
52.4123	0.954519	0.128767	0.94555	74.3319	1.0074	0.124889	0.9992									45.3053	0.968561	0.063875	0.977311	92.4502	1.14694	0.268115	1.13234
52.7499	0.936612	0.0424562	0.946803	74.8118	0.9965	0.106697	1.0003									45.5963	1.00987	0.052722	0.978802	93.0474	1.0885	0.229347	1.13334
53.0876	1.00868	0.139148	0.948042	75.2917	0.969	0.0977149	1.0015									45.8873	0.992065	0.0750161	0.980286	93.6446	1.24949	0.369284	1.13433
53.4252	0.976227	0.174323	0.949269	75.7717	0.978	0.172816	1.0027									46.1784	1.01457	0.144734	0.981763	94.2417	1.18398	0.178981	1.1353
53.7629	0.936198	0.0961116	0.950482	76.2516	1.077	0.126323	1.0038									46.4694	1.02777	0.135379	0.983232	94.8389	1.09128	0.181591	1.13626
54.1005	1.00309	0.120767	0.951683	76.7316	0.9899	0.156241	1.0049									46.7605	0.981693	0.0578836	0.984695	95.4361	1.11846	0.247732	1.1372
54.4382	0.975294	0.143282	0.952871	77.2115	0.9913	0.135998	1.006									47.0515	1.04394	0.0459334	0.986151
54.7758	0.903033	0.118335	0.954047	77.6915	1.0566	0.106366	1.0071									47.3426	0.981311	0.112689	0.987601
55.1135	0.961774	0.102369	0.955211	78.1714	1.0366	0.139527	1.0082									47.6336	0.980536	0.0577081	0.989043
55.4511	0.957085	0.115556	0.956362	78.6514	1.0146	0.0953091	1.0092									47.9247	0.977219	0.0313327	0.990479
55.7888	0.978002	0.122881	0.957502	79.1313	1.0433	0.0925594	1.0103									48.2157	0.995288	0.110618	0.991908
56.1264	0.988297	0.0641517	0.958629	79.6113	1.051	0.0980621	1.0113									48.5068	0.993644	0.0451397	0.993331
56.4641	0.959249	0.127429	0.959745	80.0912	1.0303	0.156821	1.0123									48.7978	0.932814	0.0984511	0.994746
56.8017	0.951279	0.118324	0.960849	80.5712	1.0531	0.182844	1.0133									49.0889	0.975074	0.105222	0.996155
57.1394	1.00653	0.104278	0.961941													49.3799	0.97828	0.0227144	0.997558
57.477	0.95282	0.153402	0.963023													49.671	0.969866	0.0449298	0.998954
57.8147	0.959972	0.133399	0.964092													49.962	0.958151	0.0808145	1.00034
58.1523	0.981056	0.152983	0.965151													50.2531	0.973057	0.111888	1.00173
58.49	0.961794	0.0757076	0.966198													50.5441	0.961241	0.0728123	1.0031
58.8276	0.963479	0.121628	0.967235													50.8352	0.978441	0.105412	1.00447
59.1653	0.966491	0.102061	0.968261													51.1262	0.968604	0.0847177	1.00584
59.503	1.01813	0.178855	0.969276													51.4173	0.936705	0.100425	1.0072
59.8406	1.01122	0.0986181	0.97028													51.7083	1.02436	0.0587846	1.00855
60.1783	0.989275	0.13641	0.971274													51.9993	1.00346	0.0937763	1.00989
60.5159	0.918643	0.129019	0.972257													52.2904	0.974709	0.0803578	1.01123
60.8536	0.964729	0.102474	0.973231													52.5814	1.05228	0.0258134	1.01256
61.1912	0.934666	0.181603	0.974194													52.8725	0.94514	0.0921506	1.01389
61.5289	1.00211	0.0718541	0.975147													53.1636	1.05235	0.120886	1.01521
61.8665	0.998451	0.140454	0.97609													53.4546	0.940932	0.0582623	1.01652
62.2042	0.947129	0.106847	0.977023													53.7456	0.996287	0.0692915	1.01783
62.5418	0.980236	0.169433	0.977946													54.0367	1.00344	0.121178	1.01913
62.8795	0.92007	0.0876134	0.97886													54.3277	0.991453	0.0640585	1.02043
63.2171	1.00891	0.153806	0.979764													54.6188	0.997244	0.0342045	1.02172
63.5548	1.01857	0.111401	0.980659													54.9098	1.02757	0.059502	1.023
63.8924	0.963927	0.109252	0.981544													55.2009	0.999754	0.0300213	1.02428
64.2301	0.922798	0.0604809	0.98242													55.4919	0.976166	0.0566224	1.02555
64.5677	0.999234	0.105544	0.983287													55.783	0.979455	0.102048	1.02682
64.9054	0.965834	0.133121	0.984145													56.074	1.0224	0.0427635	1.02808
65.243	1.03066	0.178163	0.984994													56.3651	1.10376	0.0988341	1.02933
65.5807	0.957175	0.13075	0.985834													56.6561	1.06626	0.073779	1.03058
65.9184	1.00132	0.145765	0.986665													56.9472	1.06506	0.114704	1.03183
66.256	0.978434	0.163353	0.987488													57.2382	1.02924	0.102512	1.03306
66.5936	0.99344	0.157492	0.988302													57.5293	0.979985	0.0647759	1.03429
66.9313	0.938763	0.150352	0.989107													57.8203	0.99623	0.0665386	1.03552
67.269	0.994362	0.144028	0.989904													58.1114	1.0322	0.0430047	1.03674
67.6066	0.962822	0.118215	0.990693													58.4024	1.10305	0.0973517	1.03795
67.9443	0.96213	0.133756	0.991474													58.6935	1.03578	0.0956197	1.03916
68.2819	0.96571	0.135607	0.992246													58.9845	1.04553	0.0548659	1.04037
68.6196	1.03954	0.130677	0.99301													59.2756	1.11796	0.0696476	1.04156
68.9572	1.05388	0.186149	0.993766													59.5666	0.978072	0.0858516	1.04276
69.2949	1.0081	0.0581676	0.994515													59.8576	1.08722	0.138667	1.04394
69.6325	0.985331	0.10059	0.995255													60.1487	1.0556	0.0423101	1.04512
69.9702	0.995962	0.0986924	0.995988													60.4397	1.08304	0.0983721	1.0463
70.3078	1.0066	0.135044	0.996713													60.7308	1.0194	0.102964	1.04747
70.6455	1.00343	0.165616	0.997431													61.0218	1.06536	0.14225	1.04863
70.9831	0.993857	0.113002	0.998141													61.3129	1.005	0.0689906	1.04979
71.3208	1.02278	0.158316	0.998843													61.6039	0.974894	0.0802655	1.05095
71.6584	0.989243	0.170592	0.999538													61.895	1.07512	0.0704833	1.0521
71.9961	1.0658	0.166414	1.00023													62.186	1.01705	0.0919785	1.05324
72.3337	0.942654	0.127001	1.00091													62.4771	1.14281	0.154725	1.05438
72.6714	0.996226	0.169429	1.00158													62.7681	1.06143	0.150017	1.05551
73.009	0.998191	0.101984	1.00225													63.0592	1.04652	0.0831439	1.05664
73.3467	0.95999	0.155939	1.00291													63.3502	1.10176	0.106133	1.05776
73.6843	1.04718	0.116851	1.00356													63.6413	1.09572	0.091249	1.05888
74.022	0.906158	0.142641	1.00421													63.9323	1.09855	0.0925825	1.05999
74.3596	1.00498	0.134008	1.00484													64.2234	1.09134	0.10097	1.0611
74.6973	0.956614	0.116792	1.00548													64.5144	0.999629	0.0865772	1.0622
75.0349	0.978653	0.0739279	1.0061													64.8055	1.14731	0.142157	1.06329
75.3726	1.04287	0.121399	1.00672													65.0965	1.05811	0.206086	1.06439
75.7103	0.940882	0.108446	1.00734													65.3876	1.04211	0.00820349	1.06547
76.0479	1.01202	0.0803768	1.00794													65.6786	1.06443	0.106762	1.06655
76.3856	1.0437	0.0931455	1.00854													65.9697	1.10132	0.0639648	1.06763
76.7232	0.970406	0.131073	1.00914													66.2607	1.08519	0.0783408	1.0687
77.0609	1.01419	0.132827	1.00972													66.5517	1.07468	0.058228	1.06977
77.3985	1.03691	0.119621	1.0103													66.8428	1.14821	0.0703616	1.07083
77.7362	1.01702	0.100371	1.01088													67.1338	1.08815	0.120764	1.07189
78.0738	0.95964	0.192204	1.01145													67.4249	1.00985	0.0905361	1.07294
78.4115	1.0419	0.162792	1.01201													67.7159	1.08349	0.132685	1.07399
78.7491	1.06686	0.212638	1.01257													68.007	1.07375	0.0794062	1.07503
79.0868	1.01991	0.178219	1.01312													68.298	1.07544	0.12951	1.07607
79.4244	1.02581	0.165548	1.01367													68.5891	1.05758	0.11167	1.0771
79.7621	1.06488	0.18504	1.01421													68.8801	1.06986	0.110921	1.07813
80.0997	1.00657	0.218322	1.01474													69.1712	1.039	0.0162704	1.07915
																69.4622	1.0894	0.0771268	1.08017
																69.7533	1.10481	0.226734	1.08118
																70.0443	1.07386	0.109136	1.08219
																70.3354	0.947867	0.107865	1.08319
																70.6264	1.14422	0.101705	1.08419
																70.9175	1.10331	0.0642059	1.08519
																71.2085	1.10678	0.0989041	1.08618
																71.4996	1.01497	0.0858081	1.08716
																71.7906	1.127	0.163054	1.08815
																72.0817	1.0356	0.110574	1.08912
																72.3727	1.08179	0.072475	1.09009
																72.6638	1.09381	0.153368	1.09106
																72.9548	1.16731	0.128734	1.09203
																73.2459	1.10233	0.142341	1.09298
																73.5369	1.08293	0.103838	1.09394
																73.828	1.08246	0.0921862	1.09489
																74.119	1.0913	0.147932	1.09583
																74.41	1.01101	0.0967297	1.09677
																74.7011	1.04813	0.0491404	1.09771
																74.9921	1.09088	0.0526395	1.09864
																75.2832	1.09826	0.0853386	1.09957
																75.5742	1.16897	0.155932	1.1005
																75.8653	1.17701	0.0887854	1.10142
																76.1563	1.09278	0.048943	1.10233
																76.4474	1.16533	0.0988593	1.10324
																76.7384	1.07911	0.0890621	1.10415
																77.0295	1.04937	0.150047	1.10505
																77.3205	1.10788	0.0715022	1.10595
																77.6116	1.0485	0.106753	1.10684
																77.9026	1.07954	0.0673739	1.10773
																78.1937	1.15375	0.0688162	1.10862
																78.4847	1.06216	0.0186568	1.1095
																78.7758	1.13074	0.161113	1.11038
																79.0668	1.13345	0.160368	1.11125
																79.3579	1.13637	0.189089	1.11212
																79.6489	1.17552	0.0958227	1.11299
																79.94	1.10731	0.093999	1.11385
																80.231	1.14559	0.0621504	1.11471
																80.5221	1.13603	0.142735	1.11556
																80.8131	1.08472	0.0962146	1.11641
																81.1041	1.12539	0.152975	1.11726
																81.3952	1.15486	0.0509786	1.1181
																81.6863	1.06838	0.0918285	1.11894
																81.9773	1.04822	0.127799	1.11977
																82.2683	1.06757	0.0862753	1.12061
																82.5594	1.12148	0.124393	1.12143
																82.8504	1.09958	0.114499	1.12225
																83.1415	1.11414	0.104613	1.12307
																83.4325	1.11388	0.105487	1.12389
																83.7236	1.13153	0.061161	1.1247
																84.0146	1.1772	0.122111	1.12551
																84.3057	1.21704	0.0976695	1.12631
																84.5967	1.06198	0.0627449	1.12711
																84.8878	1.08373	0.0726389	1.12791
																85.1788	1.1692	0.178117	1.1287
																85.4699	1.07034	0.0971889	1.12949
																85.7609	1.1469	0.0726299	1.13028
																86.052	1.1463	0.154107	1.13106
																86.343	1.10083	0.058634	1.13184
																86.6341	1.18766	0.0710196	1.13261
																86.9251	1.17036	0.217137	1.13338
																87.2162	1.12352	0.139478	1.13415
																87.5072	1.14863	0.0900401	1.13491
																87.7983	1.112	0.071212	1.13567
																88.0893	1.12631	0.0897901	1.13643
																88.3804	1.16368	0.122811	1.13718
																88.6714	1.10891	0.0463854	1.13793
																88.9625	1.18671	0.0828464	1.13868
																89.2535	1.12882	0.11144	1.13942
																89.5446	1.12443	0.0426305	1.14016
																89.8356	1.1687	0.14986	1.1409
																90.1266	1.14804	0.093659	1.14163
																90.4177	1.1825	0.0948367	1.14236
[truncated: 11 more columns]

## Sheet: Figure 5—figure supplement 4
FTIR Signal
	WT + DNA		only WT	DM + DNA		only DM	P33A + DNA		only P33A
Wavenumber (cm-1)	Normalized Absorbance @ 0 min	Normalized Absorbance @ 60 min	Normalized Absorbance	Normalized Absorbance @ 0 min	Normalized Absorbance @ 60 min	Normalized Absorbance	Normalized Absorbance @ 0 min	Normalized Absorbance @ 60 min	Normalized Absorbance
1700	-0.0129	0.023	-0.131	-0.154	0.0509	-0.1798	-0.0136	0.1302	-0.2008
1699	-0.0175	0.0173	-0.1081	-0.135	0.0272	-0.1832	-0.0132	0.1264	-0.1881
1698	-0.0125	0.0271	-0.1633	-0.1949	-0.0144	-0.1811	-0.0252	0.1296	-0.2182
1697	0.0143	0.0432	-0.2309	-0.2857	-0.0466	-0.1584	-0.0325	0.1389	-0.2632
1696	0.0545	0.0576	-0.2286	-0.3074	-0.0408	-0.1156	-0.0189	0.1486	-0.2648
1695	0.0845	0.0745	-0.1586	-0.2311	0.001941	-0.0722	0.0086093	0.1575	-0.2016
1694	0.0946	0.1008	-0.0993	-0.1369	0.0524	-0.0495	0.0351	0.1702	-0.1178
1693	0.097	0.1308	-0.0811	-0.0915	0.0893	-0.0341	0.0576	0.1875	-0.0498
1692	0.102	0.1526	-0.0793	-0.0922	0.1091	-0.0127	0.0798	0.2056	-0.0063241
1691	0.109	0.16	-0.0646	-0.1073	0.1176	0.0134	0.102	0.2205	0.0229
1690	0.114	0.1596	-0.0235	-0.1027	0.1254	0.0455	0.1248	0.2322	0.053
1689	0.1159	0.1608	0.0311	-0.0724	0.1347	0.0789	0.1457	0.2424	0.0909
1688	0.1145	0.1699	0.0781	-0.027	0.1421	0.107	0.1609	0.2532	0.1312
1687	0.1145	0.1863	0.0999	0.0046083	0.1429	0.1283	0.1695	0.2656	0.1518
1686	0.1256	0.2118	0.1016	0.0072416	0.146	0.1457	0.1768	0.2826	0.1383
1685	0.1565	0.2489	0.1181	0.0151	0.1747	0.1798	0.198	0.3058	0.117
1684	0.2013	0.2933	0.1569	0.0652	0.222	0.2513	0.2334	0.3317	0.132
1683	0.2419	0.3336	0.1892	0.1264	0.2566	0.3249	0.2649	0.3572	0.1779
1682	0.2669	0.3616	0.2039	0.1448	0.2721	0.357	0.2861	0.3811	0.2269
1681	0.2812	0.3768	0.2139	0.1257	0.2803	0.3603	0.302	0.4009	0.2625
1680	0.2946	0.3805	0.2368	0.108	0.2931	0.3556	0.3179	0.4167	0.2933
1679	0.3116	0.3768	0.2791	0.1211	0.3168	0.359	0.3391	0.4301	0.3391
1678	0.3407	0.3784	0.3208	0.1534	0.347	0.3757	0.3662	0.4457	0.3834
1677	0.3823	0.392	0.3408	0.1758	0.375	0.3937	0.3967	0.4656	0.3953
1676	0.4266	0.4188	0.3549	0.1929	0.3975	0.4051	0.4291	0.4873	0.3771
1675	0.4561	0.4533	0.3825	0.2357	0.4161	0.4138	0.4606	0.5067	0.3684
1674	0.4649	0.4887	0.413	0.291	0.427	0.4258	0.4851	0.5244	0.3889
1673	0.4654	0.5208	0.4248	0.3147	0.4325	0.4459	0.5007	0.5452	0.4174
1672	0.4723	0.5479	0.4189	0.2956	0.4359	0.4766	0.5096	0.5693	0.4332
1671	0.4908	0.5677	0.426	0.2712	0.4476	0.5167	0.5195	0.5918	0.453
1670	0.5235	0.5862	0.46	0.289	0.4759	0.5622	0.5397	0.6104	0.5012
1669	0.5702	0.6133	0.4994	0.3502	0.5159	0.5996	0.5735	0.6294	0.5652
1668	0.6196	0.6512	0.5217	0.42	0.5567	0.6183	0.6152	0.6539	0.6142
1667	0.6574	0.6898	0.5388	0.4747	0.5928	0.6303	0.6563	0.6811	0.6435
1666	0.6833	0.7223	0.5635	0.5109	0.6238	0.6491	0.6927	0.7077	0.6617
1665	0.7096	0.7487	0.6005	0.5365	0.6545	0.6758	0.7272	0.7341	0.6751
1664	0.7479	0.7738	0.6481	0.5622	0.6906	0.7025	0.7642	0.7637	0.6854
1663	0.8006	0.8021	0.7051	0.6103	0.7341	0.7286	0.8063	0.7974	0.6996
1662	0.8601	0.8392	0.7585	0.6781	0.7791	0.7627	0.849	0.8344	0.7241
1661	0.9146	0.8836	0.8002	0.736	0.8179	0.8108	0.8864	0.8726	0.7605
1660	0.9543	0.9297	0.829	0.7663	0.849	0.8723	0.9172	0.9096	0.8032
1659	0.9778	0.9687	0.8525	0.7821	0.8754	0.9345	0.944	0.941	0.8419
1658	0.988	0.993	0.8819	0.8137	0.9037	0.9799	0.9685	0.9623	0.8711
1657	0.9903	1	0.9172	0.8677	0.9328	0.9987	0.9881	0.9733	0.8846
1656	0.9889	0.9905	0.9465	0.925	0.9573	0.9993	0.9983	0.9783	0.8759
1655	0.9848	0.972	0.9653	0.9519	0.9732	0.986	0.998	0.9837	0.8419
1654	0.9806	0.9601	0.9941	0.9704	0.9926	0.9726	0.9983	0.9917	0.8316
1653	0.9871	0.9724	1	1	1	0.982	1	0.9989	0.8727
1652	1	0.9877	0.9565	0.998	0.9728	0.9953	0.9901	1	0.9344
1651	0.9986	0.9852	0.9083	0.9302	0.9317	0.9926	0.9738	0.9992	0.9858
1650	0.9788	0.97	0.8625	0.8183	0.8859	1	0.957	0.997	1
1649	0.9511	0.9461	0.8114	0.6899	0.8323	0.9947	0.9344	0.9914	0.966
1648	0.9164	0.9124	0.7814	0.5984	0.7799	0.9733	0.9096	0.9759	0.9281
1647	0.879	0.8828	0.7714	0.5727	0.7395	0.9492	0.8854	0.9512	0.9083
1646	0.8435	0.8655	0.745	0.5899	0.712	0.9405	0.8603	0.9228	0.8933
1645	0.813	0.8556	0.6992	0.6076	0.7003	0.9392	0.8381	0.897	0.8798
1644	0.7895	0.8441	0.6604	0.5984	0.7003	0.9305	0.8215	0.8749	0.8806
1643	0.7715	0.8289	0.6428	0.5596	0.7015	0.9078	0.805	0.8543	0.8862
1642	0.7576	0.8079	0.6463	0.5089	0.6964	0.873	0.7851	0.8339	0.8814
1641	0.7447	0.7849	0.6675	0.4793	0.6867	0.8336	0.7646	0.8141	0.8688
1640	0.7299	0.7676	0.6921	0.4898	0.6755	0.8008	0.7447	0.7974	0.8569
1639	0.7096	0.7569	0.7027	0.5161	0.6561	0.7828	0.7195	0.7836	0.8553
1638	0.6837	0.7454	0.6915	0.5221	0.6234	0.7787	0.6858	0.7693	0.8648
1637	0.6565	0.7223	0.6663	0.4832	0.5769	0.7828	0.6457	0.7499	0.8838
1636	0.6343	0.6853	0.6328	0.4154	0.5241	0.7841	0.6076	0.7233	0.8972
1635	0.6163	0.6401	0.5952	0.3456	0.4736	0.7787	0.5719	0.6935	0.887
1634	0.5914	0.5956	0.5799	0.3048	0.4402	0.764	0.5387	0.6668	0.8672
1633	0.5586	0.5619	0.587	0.2883	0.4255	0.7547	0.5099	0.6452	0.8561
1632	0.5309	0.5422	0.5928	0.2798	0.4193	0.7453	0.4874	0.6272	0.8419
1631	0.5152	0.5331	0.5858	0.2778	0.4189	0.7259	0.4732	0.6101	0.8166
1630	0.5092	0.529	0.5693	0.2844	0.4259	0.6972	0.4672	0.5928	0.7897
1629	0.5046	0.5228	0.5517	0.2995	0.4375	0.6718	0.4646	0.5745	0.77
1628	0.494	0.5113	0.5306	0.3127	0.4445	0.6564	0.4566	0.5555	0.751
1627	0.4746	0.494	0.5012	0.3127	0.4394	0.643	0.4381	0.5365	0.7249
1626	0.4501	0.4714	0.4642	0.2883	0.4212	0.6257	0.4103	0.5186	0.6964
1625	0.4257	0.4447	0.4295	0.239	0.3944	0.6029	0.3775	0.5009	0.6743
1624	0.4049	0.4163	0.4095	0.1824	0.3668	0.5775	0.3457	0.4828	0.6672
1623	0.3869	0.3937	0.4078	0.1547	0.3494	0.5475	0.3202	0.4645	0.6696
1622	0.3698	0.3805	0.416	0.1685	0.3459	0.516	0.303	0.4483	0.6704
1621	0.3564	0.3727	0.4207	0.1968	0.3463	0.4906	0.2897	0.4366	0.664
1620	0.349	0.362	0.4083	0.2093	0.3335	0.4806	0.2722	0.4287	0.6466
1619	0.3509	0.3443	0.3872	0.2054	0.3047	0.482	0.251	0.4218	0.6134
1618	0.3573	0.3246	0.376	0.2093	0.2768	0.4759	0.2358	0.4127	0.5652
1617	0.3596	0.313	0.3825	0.235	0.2698	0.4505	0.2371	0.3986	0.5091
1616	0.349	0.3118	0.3778	0.2475	0.2752	0.4057	0.246	0.3813	0.449
1615	0.3273	0.3102	0.3502	0.2159	0.2741	0.3583	0.2483	0.3663	0.4008
1614	0.3056	0.3011	0.3173	0.1593	0.2651	0.3282	0.2427	0.3563	0.3771
1613	0.2932	0.2884	0.2932	0.1093	0.2543	0.3168	0.2348	0.3499	0.3692
1612	0.2867	0.2793	0.2761	0.0783	0.2465	0.3122	0.2278	0.3449	0.3628
1611	0.2765	0.2727	0.265	0.0652	0.2418	0.3061	0.2219	0.3394	0.3589
1610	0.2544	0.2596	0.2632	0.0612	0.2376	0.3028	0.2156	0.3316	0.366
1609	0.2211	0.2336	0.2673	0.052	0.2306	0.3041	0.205	0.3212	0.3842
1608	0.1893	0.2044	0.2691	0.0316	0.2217	0.3082	0.1891	0.31	0.4032
1607	0.1681	0.1876	0.2656	0.0145	0.2143	0.3135	0.1732	0.3	0.415
1606	0.156	0.1859	0.2585	0.0165	0.2089	0.3142	0.1619	0.2913	0.4182
1605	0.1473	0.1892	0.2462	0.0336	0.2019	0.3001	0.155	0.2833	0.4095
1604	0.1422	0.1892	0.2286	0.056	0.1918	0.2721	0.151	0.2759	0.3921
1603	0.1427	0.1835	0.2086	0.0757	0.1801	0.2406	0.15	0.2684	0.3684
1602	0.1454	0.1719	0.1998	0.0876	0.17	0.2226	0.1513	0.2599	0.3486
1601	0.1431	0.1596	0.2027	0.0862	0.1611	0.2213	0.1503	0.2511	0.3344
1600	0.132	0.1481	0.2103	0.0665	0.1502	0.2326	0.1424	0.2433	0.3249

## Sheet: Figure 6—figure supplement 1
FRAP signal at different time points
Y19A @ 0-10min			Y19A @ 10-20min				Y19A @ 20-30min						Y19A t-half @ 0-10min	Y19A t-half @ 10-20min	Y19A t-half @ 20-30min			Y19A Amp @ 0-10min	Y19A Amp @ 10-20min	Y19A Amp @ 20-30min
Time (sec)	Fractional Recovery	fit	Time (sec)	Fractional Recovery	error	fit	Time (sec)	Fractional Recovery	error	fit		t-half	26.3	14.03	5.35		Fractional Amplitude	0.9589	0.6193	0.3492
0.0033	1		0.0033	1	0		0.0033	1	0					20.57	9.36				0.6012	0.3544
0.8567	1.0318		0.8567	1.0065	0.0265		0.8567	0.9987	0.022					22.96	11.28				0.5877	0.3065
2.13	0	0.002028	2.13	0	0	0.0176	2.13	0	0	0.0079255				15.31					0.5696
2.9834	0.0853	0.0786	2.9834	0.0649	0.0114	0.0559	2.9834	0.0378	0.0201	0.0355		Average thalf	26.3	18.2175	8.6633		Average Amp	0.9589	0.5945	0.3367
3.8368	0.1214	0.125	3.8368	0.0954	0.0173	0.0881	3.8368	0.0586	0.0236	0.0594		Error		4.2432	3.0258		Error		0.021	0.0263
4.6902	0.1507	0.1553	4.6902	0.1278	0.0212	0.1155	4.6902	0.0865	0.0262	0.0802
5.5436	0.1814	0.1769	5.5436	0.1443	0.0257	0.1388	5.5436	0.1014	0.0382	0.0983
6.397	0.1859	0.1939	6.397	0.1668	0.0237	0.1588	6.397	0.1228	0.031	0.1142
7.2504	0.2211	0.2084	7.2504	0.1688	0.0255	0.176	7.2504	0.1291	0.038	0.1281
8.1038	0.2211	0.2215	8.1038	0.1929	0.0274	0.191	8.1038	0.1386	0.0383	0.1403
8.9572	0.2247	0.2337	8.9572	0.1988	0.0196	0.2042	8.9572	0.1462	0.0235	0.1511
9.8106	0.2358	0.2454	9.8106	0.2126	0.0284	0.2158	9.8106	0.162	0.0316	0.1606
10.664	0.2497	0.2568	10.664	0.2128	0.0252	0.2262	10.664	0.1669	0.0363	0.169
11.5174	0.2794	0.268	11.5174	0.2327	0.0343	0.2356	11.5174	0.1837	0.0376	0.1765
12.3708	0.2768	0.2789	12.3708	0.2469	0.0335	0.2441	12.3708	0.1778	0.0494	0.1833
13.2242	0.2896	0.2897	13.2242	0.2412	0.0308	0.2519	13.2242	0.1854	0.0445	0.1893
14.0776	0.3023	0.3003	14.0776	0.2473	0.0181	0.259	14.0776	0.1908	0.0294	0.1947
14.931	0.3105	0.3108	14.931	0.2646	0.0311	0.2657	14.931	0.2031	0.0422	0.1997
15.7844	0.3117	0.3211	15.7844	0.2688	0.0306	0.272	15.7844	0.1955	0.0409	0.2042
16.6378	0.3293	0.3313	16.6378	0.284	0.0328	0.278	16.6378	0.2083	0.0435	0.2083
17.4912	0.3558	0.3414	17.4912	0.275	0.0318	0.2836	17.4912	0.2033	0.0393	0.212
18.3446	0.3398	0.3513	18.3446	0.2876	0.0483	0.289	18.3446	0.2126	0.0501	0.2155
19.198	0.3445	0.3611	19.198	0.2876	0.0335	0.2942	19.198	0.2186	0.0485	0.2188
20.0514	0.3897	0.3708	20.0514	0.3173	0.0374	0.2992	20.0514	0.2169	0.0435	0.2218
20.9048	0.3938	0.3803	20.9048	0.2992	0.0317	0.304	20.9048	0.2311	0.0387	0.2246
21.7582	0.3892	0.3897	21.7582	0.3049	0.0362	0.3087	21.7582	0.2322	0.0389	0.2273
22.6116	0.3978	0.399	22.6116	0.3117	0.0368	0.3133	22.6116	0.2299	0.0372	0.2298
23.465	0.4029	0.4082	23.465	0.3182	0.0303	0.3177	23.465	0.2354	0.049	0.2322
24.3184	0.402	0.4173	24.3184	0.3252	0.0478	0.3221	24.3184	0.2284	0.0366	0.2344
25.1718	0.4382	0.4262	25.1718	0.3234	0.032	0.3264	25.1718	0.2357	0.0455	0.2366
26.0252	0.4331	0.435	26.0252	0.3453	0.0297	0.3306	26.0252	0.2354	0.0547	0.2387
26.8786	0.432	0.4437	26.8786	0.3402	0.037	0.3347	26.8786	0.2393	0.0469	0.2407
27.732	0.4506	0.4523	27.732	0.3461	0.0445	0.3388	27.732	0.2439	0.0473	0.2426
28.5854	0.4858	0.4608	28.5854	0.3417	0.0351	0.3428	28.5854	0.2416	0.0466	0.2445
29.4388	0.4874	0.4692	29.4388	0.3525	0.0355	0.3467	29.4388	0.2443	0.0432	0.2463
30.2922	0.483	0.4774	30.2922	0.3603	0.0303	0.3506	30.2922	0.2477	0.0476	0.248
31.1456	0.4834	0.4856	31.1456	0.3502	0.0394	0.3544	31.1456	0.2531	0.0344	0.2497
31.999	0.482	0.4936	31.999	0.3567	0.035	0.3582	31.999	0.2529	0.0356	0.2514
32.8524	0.5117	0.5015	32.8524	0.3702	0.0325	0.362	32.8524	0.2546	0.0406	0.253
33.7058	0.501	0.5094	33.7058	0.3715	0.0368	0.3656	33.7058	0.2594	0.0393	0.2545
34.5592	0.5155	0.5171	34.5592	0.3721	0.0399	0.3693	34.5592	0.2538	0.0399	0.2561
35.4126	0.5146	0.5248	35.4126	0.3724	0.0344	0.3729	35.4126	0.2556	0.0505	0.2576
36.266	0.5498	0.5323	36.266	0.3759	0.0475	0.3764	36.266	0.2591	0.0536	0.259
37.1194	0.5305	0.5397	37.1194	0.3742	0.0337	0.3799	37.1194	0.2624	0.0478	0.2605
37.9728	0.5525	0.5471	37.9728	0.3867	0.0476	0.3834	37.9728	0.2705	0.0537	0.2619
38.8262	0.5542	0.5543	38.8262	0.3868	0.049	0.3868	38.8262	0.2637	0.0393	0.2633
39.6796	0.5959	0.5614	39.6796	0.3881	0.042	0.3902	39.6796	0.2711	0.0449	0.2646
40.533	0.5817	0.5685	40.533	0.3859	0.0394	0.3935	40.533	0.2718	0.0607	0.266
41.3864	0.5658	0.5755	41.3864	0.3937	0.0469	0.3968	41.3864	0.2578	0.0321	0.2673
42.2398	0.5715	0.5823	42.2398	0.3878	0.0352	0.4001	42.2398	0.2707	0.0457	0.2686
43.0932	0.5867	0.5891	43.0932	0.4057	0.0402	0.4033	43.0932	0.2764	0.0513	0.2698
43.9466	0.6165	0.5958	43.9466	0.4191	0.0474	0.4065	43.9466	0.2752	0.0464	0.2711
44.8	0.5952	0.6024	44.8	0.4053	0.0385	0.4097	44.8	0.2743	0.049	0.2723
45.6534	0.6034	0.6089	45.6534	0.416	0.0371	0.4128	45.6534	0.2831	0.0467	0.2735
46.5068	0.6018	0.6154	46.5068	0.4276	0.0281	0.4159	46.5068	0.2725	0.0475	0.2747
47.3602	0.6268	0.6217	47.3602	0.4191	0.0368	0.4189	47.3602	0.2721	0.0388	0.2759
48.2136	0.6379	0.628	48.2136	0.42	0.0337	0.4219	48.2136	0.281	0.0459	0.277
49.067	0.6253	0.6342	49.067	0.4251	0.0374	0.4249	49.067	0.2806	0.0443	0.2781
49.9204	0.657	0.6403	49.9204	0.4264	0.0477	0.4279	49.9204	0.2859	0.05	0.2793
50.7738	0.6551	0.6463	50.7738	0.4312	0.0346	0.4308	50.7738	0.2835	0.0447	0.2804
51.6272	0.6452	0.6522	51.6272	0.4356	0.0265	0.4337	51.6272	0.2864	0.0352	0.2814
52.4806	0.6373	0.6581	52.4806	0.4327	0.0255	0.4365	52.4806	0.2821	0.0397	0.2825
53.334	0.6585	0.6639	53.334	0.4423	0.0324	0.4393	53.334	0.2847	0.0423	0.2835
54.1874	0.6604	0.6696	54.1874	0.4476	0.029	0.4421	54.1874	0.2847	0.0465	0.2846
55.0408	0.6919	0.6753	55.0408	0.4529	0.0452	0.4448	55.0408	0.2917	0.0438	0.2856
55.8942	0.6791	0.6808	55.8942	0.4471	0.0379	0.4476	55.8942	0.2865	0.0365	0.2866
56.7476	0.6769	0.6863	56.7476	0.4539	0.0249	0.4502	56.7476	0.2876	0.0362	0.2876
57.601	0.6815	0.6917	57.601	0.4445	0.0289	0.4529	57.601	0.2851	0.0462	0.2885
58.4544	0.6703	0.6971	58.4544	0.4592	0.0329	0.4555	58.4544	0.2831	0.0431	0.2895
59.3078	0.696	0.7024	59.3078	0.4578	0.0424	0.4581	59.3078	0.2959	0.0394	0.2904
60.1612	0.7124	0.7076	60.1612	0.4558	0.0433	0.4607	60.1612	0.2827	0.0604	0.2913
61.0146	0.7116	0.7127	61.0146	0.4565	0.0344	0.4632	61.0146	0.3033	0.0358	0.2922
61.868	0.7238	0.7178	61.868	0.4683	0.0399	0.4657	61.868	0.2859	0.0459	0.2931
62.7214	0.7148	0.7228	62.7214	0.4681	0.0369	0.4682	62.7214	0.2875	0.0468	0.294
63.5748	0.7052	0.7278	63.5748	0.4808	0.0284	0.4706	63.5748	0.2912	0.0453	0.2949
64.4282	0.7294	0.7326	64.4282	0.4734	0.0339	0.4731	64.4282	0.2917	0.0535	0.2957
65.2816	0.746	0.7375	65.2816	0.4811	0.0415	0.4755	65.2816	0.3022	0.0505	0.2966
66.135	0.7352	0.7422	66.135	0.4781	0.0356	0.4778	66.135	0.2942	0.0423	0.2974
66.9884	0.7372	0.7469	66.9884	0.4812	0.0406	0.4802	66.9884	0.2904	0.0392	0.2982
67.8418	0.7297	0.7515	67.8418	0.4816	0.044	0.4825	67.8418	0.2962	0.0453	0.299
68.6952	0.7733	0.7561	68.6952	0.481	0.0298	0.4848	68.6952	0.2967	0.0399	0.2998
69.5486	0.7628	0.7606	69.5486	0.4847	0.0292	0.487	69.5486	0.2992	0.0457	0.3006
70.402	0.7834	0.7651	70.402	0.4848	0.0384	0.4893	70.402	0.3061	0.0455	0.3014
71.2554	0.755	0.7695	71.2554	0.4887	0.0338	0.4915	71.2554	0.3029	0.0407	0.3021
72.1088	0.7675	0.7738	72.1088	0.4905	0.0306	0.4937	72.1088	0.2998	0.0424	0.3029
72.9622	0.7877	0.7781	72.9622	0.4924	0.0267	0.4958	72.9622	0.3071	0.0496	0.3036
73.8156	0.7806	0.7823	73.8156	0.5034	0.0409	0.4979	73.8156	0.2979	0.0474	0.3043
74.669	0.7858	0.7865	74.669	0.4927	0.0228	0.5001	74.669	0.3042	0.0395	0.305
75.5224	0.8228	0.7906	75.5224	0.4939	0.0344	0.5021	75.5224	0.302	0.0397	0.3057
76.3758	0.8074	0.7947	76.3758	0.5047	0.0296	0.5042	76.3758	0.303	0.0406	0.3064
77.2292	0.8175	0.7987	77.2292	0.5005	0.0204	0.5062	77.2292	0.2947	0.0422	0.3071
78.0826	0.7955	0.8026	78.0826	0.5034	0.0307	0.5083	78.0826	0.3124	0.0287	0.3078
78.936	0.8062	0.8065	78.936	0.5022	0.0282	0.5103	78.936	0.3022	0.0334	0.3084
79.7894	0.7988	0.8104	79.7894	0.521	0.0349	0.5122	79.7894	0.2991	0.0482	0.3091
80.6428	0.7999	0.8142	80.6428	0.5127	0.0343	0.5142	80.6428	0.3102	0.0461	0.3097
81.4962	0.8182	0.8179	81.4962	0.5179	0.021	0.5161	81.4962	0.3082	0.0344	0.3104
82.3496	0.8083	0.8216	82.3496	0.5218	0.0451	0.518	82.3496	0.3168	0.0345	0.311
83.203	0.8362	0.8253	83.203	0.5203	0.0304	0.5199	83.203	0.3117	0.0332	0.3116
84.0564	0.828	0.8289	84.0564	0.5251	0.0375	0.5217	84.0564	0.3141	0.0418	0.3122
84.9098	0.8192	0.8325	84.9098	0.5271	0.0311	0.5236	84.9098	0.3189	0.0314	0.3128
85.7632	0.866	0.836	85.7632	0.5228	0.0235	0.5254	85.7632	0.3031	0.0417	0.3134
86.6166	0.8339	0.8394	86.6166	0.5333	0.027	0.5272	86.6166	0.3088	0.0375	0.3139
87.47	0.8614	0.8429	87.47	0.5295	0.0369	0.529	87.47	0.3204	0.0361	0.3145
88.3234	0.8667	0.8462	88.3234	0.5197	0.0211	0.5307	88.3234	0.3166	0.0389	0.3151
89.1768	0.8627	0.8496	89.1768	0.5249	0.0266	0.5325	89.1768	0.3188	0.0343	0.3156
90.0302	0.8389	0.8529	90.0302	0.538	0.0275	0.5342	90.0302	0.3122	0.0366	0.3162
90.8836	0.86	0.8561	90.8836	0.5443	0.0311	0.5359	90.8836	0.3218	0.0365	0.3167
91.737	0.8639	0.8593	91.737	0.5369	0.0191	0.5376	91.737	0.3146	0.032	0.3172
92.5904	0.8616	0.8625	92.5904	0.5454	0.0207	0.5392	92.5904	0.3236	0.0306	0.3177
93.4438	0.8696	0.8656	93.4438	0.5434	0.0299	0.5409	93.4438	0.3196	0.028	0.3182
94.2972	0.8716	0.8687	94.2972	0.5377	0.0286	0.5425	94.2972	0.321	0.0298	0.3187
95.1506	0.8565	0.8717	95.1506	0.5307	0.0316	0.5441	95.1506	0.3091	0.0293	0.3192
96.004	0.8837	0.8747	96.004	0.5413	0.0166	0.5457	96.004	0.3175	0.0324	0.3197
96.8574	0.8735	0.8777	96.8574	0.5344	0.0271	0.5472	96.8574	0.3155	0.0277	0.3202
97.7108	0.8668	0.8806	97.7108	0.5516	0.0293	0.5488	97.7108	0.3223	0.0239	0.3207
98.5642	0.8815	0.8835	98.5642	0.5455	0.0092	0.5503	98.5642	0.3228	0.0193	0.3211
99.4176	0.8682	0.8863	99.4176	0.5501	0.0364	0.5518	99.4176	0.3265	0.0241	0.3216
100.271	0.887	0.8892	100.271	0.5541	0.0183	0.5533	100.271	0.3406	0.0497	0.3221
101.124	0.8978	0.8919	101.124	0.5566	0.0249	0.5548	101.124	0.3215	0.0298	0.3225
101.978	0.9179	0.8947	101.978	0.5473	0.0112	0.5563	101.978	0.3236	0.0182	0.3229
102.831	0.8988	0.8974	102.831	0.5504	0.0134	0.5577	102.831	0.3256	0.0234	0.3234
103.685	0.9036	0.9	103.685	0.5398	0.02	0.5591	103.685	0.3183	0.0315	0.3238
104.538	0.8863	0.9027	104.538	0.5579	0.0271	0.5605	104.538	0.3258	0.0218	0.3242
105.391	0.8793	0.9053	105.391	0.5722	0.0289	0.5619	105.391	0.3274	0.0232	0.3246
106.245	0.8961	0.9078	106.245	0.5608	0.0189	0.5633	106.245	0.3204	0.023	0.325
107.098	0.8949	0.9104	107.098	0.5717	0.0159	0.5647	107.098	0.3162	0.0261	0.3254
107.952	0.9118	0.9129	107.952	0.574	0.0222	0.566	107.952	0.3159	0.012	0.3258
108.805	0.9323	0.9153	108.805	0.5698	0.0108	0.5674	108.805	0.3242	0.0175	0.3262
109.658	0.9411	0.9177	109.658	0.5638	0.0195	0.5687	109.658	0.3323	0.0231	0.3266
110.512	0.9006	0.9201	110.512	0.5688	0.0275	0.57	110.512	0.3273	0.0229	0.327
111.365	0.9098	0.9225	111.365	0.5735	0.0146	0.5713	111.365	0.3201	0.0187	0.3273
112.219	0.9157	0.9249	112.219	0.5805	0.0171	0.5726	112.219	0.3234	0.0164	0.3277
113.072	0.9394	0.9272	113.072	0.5737	0.0151	0.5738	113.072	0.3288	0.0119	0.3281
113.925	0.9405	0.9294	113.925	0.5846	0.0287	0.5751	113.925	0.3369	0.0152	0.3284
114.779	0.9362	0.9317	114.779	0.5775	0.0184	0.5763	114.779	0.3268	0.0109	0.3288
115.632	0.906	0.9339	115.632	0.5851	0.0115	0.5775	115.632	0.3314	0.0191	0.3291
116.486	0.9457	0.9361	116.486	0.5932	0.0226	0.5787	116.486	0.3322	0.0078	0.3294
117.339	0.9705	0.9383	117.339	0.5839	0.0151	0.5799	117.339	0.3332	0.0137	0.3298
118.192	0.9375	0.9404	118.192	0.5751	0.0128	0.5811	118.192	0.3313	0.0166	0.3301
119.046	0.931	0.9425	119.046	0.5835	0.012	0.5822	119.046	0.3368	0.0103	0.3304
119.899	0.9589	0.9446					119.899	0.3367	0.0263	0.3307
